# Supplementary material for: Systematic Investigation of the Diagnostic and Prognostic Impact of LINC01087 in Human Cancers
Source: MDPI journal article supplement (doi:10.3390/cancers14235980), 2022-12-03
Supplement: s1 [file s1]

# Systematic investigation of the diagnostic and prognostic impact of LINC01087 in human cancers

Fatima Domenica Elisa De Palma <sup>1,2,3,4,†</sup>, Vincent Carbonnier <sup>3,4,†</sup>, Francesco Salvatore <sup>2,5</sup>, Guido Kroemer <sup>3,4,6</sup>, Jonathan G. Pol <sup>3,4,\*,‡</sup> and Maria Chiara Maiuri <sup>1,3,4,‡,\*</sup>

<sup>1</sup> Department of Molecular Medicine and Medical Biotechnologies, University of Napoli Federico II, 80131 Napoli, Italy

<sup>2</sup> CEINGE-Biotecnologie Avanzate Franco Salvatore, 80145 Napoli, Italy

<sup>3</sup> Équipe Labellisée par la Ligue Contre le Cancer, Centre de Recherche des Cordeliers, Inserm U1138, Université Paris Cité, Sorbonne Université, Institut Universitaire de France, 75005 Paris, France

<sup>4</sup> Metabolomics and Cell Biology Platforms, Gustave Roussy Cancer Campus, 94805 Villejuif, France

<sup>5</sup> Centro Interuniversitario per Malattie Multigeniche e Multifattoriali e Loro Modelli Animali (Federico II, 80131, Napoli, Tor Vergata, Rome and “G. D’Annunzio”, Chieti-Pescara), 80131 Napoli, Italy

<sup>6</sup> Department of Biology, Institut du Cancer Paris CARPEM, Hôpital Européen Georges Pompidou, 75004 Paris, France

\* Correspondence: pol\_jonathan@yahoo.fr (J.G.P.); chiara.maiuri@crc.jussieu.fr (M.C.M.)

## Supplementary Tables

**Table S1.** Non-significant associations between LINC01087 expression and clinicopathological characteristics in TCGA and GTEx data.

| BC                           |            |                   |                      |      |         |
|------------------------------|------------|-------------------|----------------------|------|---------|
| Clinicopathological features |            | n. of total cases | LINC01087 expression |      | P-value |
|                              |            |                   | Low                  | High |         |
| Gender                       | Female     | 1100              | 555                  | 545  | 0.09    |
|                              | Male       | 12                | 3                    | 9    |         |
| Age                          | < 50 years | 296               | 146                  | 150  | 0.73    |
|                              | ≥ 50 years | 801               | 405                  | 396  |         |
| Tumor stage                  | I-II       | 815               | 411                  | 404  | 0.78    |
|                              | III-IV     | 273               | 135                  | 138  |         |
| pN                           | N0         | 523               | 276                  | 247  | 0.09    |
|                              | N+         | 569               | 271                  | 298  |         |
| pM                           | M0         | 923               | 465                  | 458  | 0.28    |
|                              | M1         | 6                 | 14                   | 8    |         |
| ESCA                         |            |                   |                      |      |         |
| Clinicopathological features |            | n. of total cases | LINC01087 expression |      | P-value |
|                              |            |                   | Low                  | High |         |
| Gender                       | Female     | 23                | 13                   | 10   | 1.00    |
|                              | Male       | 140               | 81                   | 59   |         |
| Age                          | < 50 years | 21                | 15                   | 6    | 0.24    |
|                              | ≥ 50 years | 142               | 79                   | 63   |         |
| Tumor stage                  | I-II       | 85                | 53                   | 32   | 0.12    |
|                              | III-IV     | 57                | 28                   | 29   |         |
| pT                           | T1-T2      | 82                | 49                   | 33   | 0.61    |
|                              | T3-T4      | 64                | 35                   | 29   |         |
| pN                           | N0         | 66                | 42                   | 24   | 0.18    |
|                              | N1-N2-N3   | 78                | 40                   | 38   |         |
| pM                           | M0         | 121               | 67                   | 54   | 0.14    |
|                              | M1         | 8                 | 2                    | 6    |         |
| Tumor size                   | ≤ 2cm      | 119               | 71                   | 48   | 0.29    |
|                              | > 2cm      | 27                | 13                   | 14   |         |
| OV                           |            |                   |                      |      |         |
| Clinicopathological features |            | n. of total cases | LINC01087 expression |      | P-value |
|                              |            |                   | Low                  | High |         |
| Gender                       | Female     | 381               | 235                  | 146  | 1       |
|                              | Male       | 0                 | 0                    | 0    |         |

|             |            |     |     |     |          |
|-------------|------------|-----|-----|-----|----------|
| Age         | < 50 years | 79  | 54  | 25  | 0.23987  |
|             | ≥ 50 years | 294 | 178 | 116 |          |
| Tumor stage | I-II       | 24  | 13  | 11  | 0.515346 |
|             | III-IV     | 354 | 221 | 133 |          |
| pT          | T1-T2      | 262 | 139 | 123 | 0.26     |
|             | T3-T4      | 44  | 19  | 25  |          |
| pN          | N0         | NA  | NA  | NA  | NA       |
|             | N1-N2-N3   | NA  | NA  | NA  |          |
| pM          | M0         | NA  | NA  | NA  | NA       |
|             | M1         | NA  | NA  | NA  |          |
| Tumor size  | ≤ 2cm      | NA  | NA  | NA  | NA       |
|             | > 2cm      | NA  | NA  | NA  |          |

**STAD**

| Clinicopathological features |            | n. of total cases | LINC01087 expression |      | P-value |
|------------------------------|------------|-------------------|----------------------|------|---------|
|                              |            |                   | Low                  | High |         |
| Gender                       | Female     | 134               | 79                   | 55   | 0.52    |
|                              | Male       | 241               | 133                  | 108  |         |
| Age                          | < 50 years | 26                | 10                   | 16   | 0.07    |
|                              | ≥ 50 years | 341               | 197                  | 144  |         |
| Tumor stage                  | I-II       | 164               | 89                   | 75   | 0.59    |
|                              | III-IV     | 188               | 108                  | 80   |         |
| pT                           | T1-T2      | 99                | 58                   | 41   | 0.64    |
|                              | T3-T4      | 268               | 149                  | 119  |         |
| pN                           | N0         | 111               | 60                   | 51   | 0.49    |
|                              | N1-N2-N3   | 246               | 143                  | 103  |         |
| pM                           | M0         | 330               | 192                  | 138  | 0.84    |
|                              | M1         | 25                | 14                   | 11   |         |
| Tumor size                   | ≤ 2cm      | 19                | 13                   | 6    | 0.35    |
|                              | > 2cm      | 348               | 194                  | 154  |         |

**TGCT**

| Clinicopathological features |            | n. of total cases | LINC01087 expression |      | P-value |
|------------------------------|------------|-------------------|----------------------|------|---------|
|                              |            |                   | Low                  | High |         |
| Gender                       | Female     | 139               | 81                   | 58   | 1.00    |
|                              | Male       | 0                 | 0                    | 0    |         |
| Age                          | < 50 years | 131               | 77                   | 54   | 0.72    |
|                              | ≥ 50 years | 8                 | 4                    | 4    |         |
| Tumor stage                  | I-II       | 118               | 66                   | 52   | 0.39    |
|                              | III-IV     | 14                | 10                   | 4    |         |
| pT                           | T1-T2      | 132               | 77                   | 55   | 1.00    |

|    |          |     |    |    |      |
|----|----------|-----|----|----|------|
|    | T3-T4    | 6   | 4  | 2  |      |
| pN | N0       | 51  | 34 | 17 | 0.52 |
|    | N1-N2-N3 | 13  | 7  | 6  |      |
| pM | M0       | 125 | 72 | 53 | 0.14 |
|    | M1       | 8   | 7  | 1  |      |

Abbreviations: BC, breast cancer; ESCA, esophageal carcinoma; NA, not available; OV, ovarian cancer; pN, lymph node stage; pM, metastasis stage; pT, tumor stage; STAD, stomach cancer; TGCT, testicular germ cell tumors, Fisher's test,

**Table S2.** Genes significantly correlated with LINC01087 expression in breast cancer (TCGA).

| Gene symbol | Positive R value | P-value     | Gene symbol | Positive R value | P-value     |
|-------------|------------------|-------------|-------------|------------------|-------------|
| POTEKP      | 0.96             | 0           | RPS20P4     | 0.44             | 5.52605E-54 |
| AC093838.1  | 0.88             | 0           | AC105074.1  | 0.44             | 6.06226E-54 |
| POTEI       | 0.82             | 3.2585E-268 | AC008269.1  | 0.44             | 6.25578E-54 |
| GRAMD4P8    | 0.80             | 1.5094E-246 | AC010746.1  | 0.44             | 6.26245E-54 |
| C2orf27A    | 0.79             | 3.7805E-241 | POTEF       | 0.44             | 7.79569E-54 |
| POTEH       | 0.71             | 5.7065E-173 | RNU6-155P   | 0.44             | 8.87003E-54 |
| AC109361.2  | 0.70             | 1.2019E-163 | RNU6-347P   | 0.44             | 9.91852E-54 |
| AC093838.2  | 0.69             | 2.9736E-157 | AC009948.3  | 0.44             | 1.02348E-53 |
| AC103702.1  | 0.67             | 1.1757E-146 | AC068790.1  | 0.44             | 1.05772E-53 |
| LINC02676   | 0.67             | 2.7563E-144 | AC013439.1  | 0.44             | 1.16953E-53 |
| MIR1252     | 0.67             | 4.7256E-143 | AL079304.1  | 0.44             | 1.26811E-53 |
| POTEJ       | 0.66             | 1.0889E-141 | AL117339.4  | 0.44             | 1.55987E-53 |
| AC008679.1  | 0.66             | 1.97E-139   | RN7SKP74    | 0.44             | 1.67098E-53 |
| AC105924.1  | 0.65             | 2.1522E-135 | RNA5SP372   | 0.44             | 1.8863E-53  |
| RNU6-904P   | 0.64             | 1.1546E-131 | RNU6-652P   | 0.44             | 2.03564E-53 |
| C1QTNF7-AS1 | 0.64             | 3.6074E-130 | ZNF680P1    | 0.44             | 3.25899E-53 |
| RPS16P3     | 0.64             | 4.1942E-130 | NDUFB4P2    | 0.44             | 3.50031E-53 |
| MIR7157     | 0.64             | 2.8214E-128 | MIR3170     | 0.44             | 3.95551E-53 |
| AL365436.2  | 0.63             | 3.8839E-126 | AMD1P1      | 0.44             | 4.82322E-53 |
| MIR4460     | 0.63             | 6.6005E-126 | AC011458.1  | 0.44             | 5.07023E-53 |
| REXO1L9P    | 0.63             | 2.2553E-122 | TCP11X2     | 0.44             | 6.00394E-53 |
| AC096733.1  | 0.62             | 8.5576E-118 | AC012404.2  | 0.44             | 6.17481E-53 |
| AC018511.2  | 0.62             | 1.8347E-117 | RNA5SP294   | 0.44             | 6.4889E-53  |
| NBEAP2      | 0.61             | 7.0889E-116 | LINC01946   | 0.44             | 7.2298E-53  |
| AL021068.1  | 0.61             | 2.5408E-114 | HMG1P20     | 0.44             | 7.79725E-53 |
| AL365436.1  | 0.61             | 2.0952E-113 | AC006296.1  | 0.44             | 1.35717E-52 |
| AL355333.1  | 0.61             | 3.44E-113   | MTCO1P29    | 0.43             | 1.36158E-52 |
| AL354771.1  | 0.60             | 8.1242E-112 | AC096586.2  | 0.43             | 1.39966E-52 |
| IDI1P1      | 0.60             | 1.5692E-110 | RNU6-1152P  | 0.43             | 1.41596E-52 |
| AC008591.1  | 0.60             | 4.5317E-110 | DUTP8       | 0.43             | 1.66284E-52 |
| AC090709.1  | 0.59             | 1.6977E-105 | AC009716.1  | 0.43             | 1.70329E-52 |
| TMEM161BP1  | 0.59             | 3.4108E-105 | AC245884.3  | 0.43             | 1.80276E-52 |
| AC020549.1  | 0.59             | 2.5896E-103 | AL157902.2  | 0.43             | 1.85977E-52 |
| MIR1537     | 0.58             | 4.9776E-103 | AP005131.1  | 0.43             | 1.92492E-52 |
| LRRC57P1    | 0.58             | 3.8318E-102 | XKRY        | 0.43             | 2.08566E-52 |
| LINC02510   | 0.58             | 5.9555E-100 | SLC7A2-IT1  | 0.43             | 2.32398E-52 |
| RNU6-316P   | 0.57             | 2.22472E-98 | RNU6-1267P  | 0.43             | 3.30229E-52 |
| RNU6-148P   | 0.57             | 1.27474E-97 | PBOV1       | 0.43             | 3.55247E-52 |

|             |      |             |              |      |             |
|-------------|------|-------------|--------------|------|-------------|
| RNU6-402P   | 0.57 | 2.07655E-97 | COX6CP10     | 0.43 | 3.69733E-52 |
| RPS20P15    | 0.57 | 3.22721E-96 | AC007622.2   | 0.43 | 4.10376E-52 |
| AC008533.1  | 0.57 | 5.28839E-96 | AL139396.1   | 0.43 | 6.10676E-52 |
| TMEM251P1   | 0.57 | 7.69541E-96 | RNU6-1112P   | 0.43 | 7.98189E-52 |
| ATP5MDP1    | 0.57 | 4.22373E-95 | SNORD69      | 0.43 | 1.142E-51   |
| VN1R53P     | 0.57 | 5.45731E-95 | PRICKLE2-AS1 | 0.43 | 1.23387E-51 |
| AC005741.1  | 0.56 | 6.62598E-94 | MIR5586      | 0.43 | 1.25373E-51 |
| PRKAR2B-AS1 | 0.56 | 1.83446E-93 | AL450263.1   | 0.43 | 1.52582E-51 |
| MIR554      | 0.56 | 2.90578E-93 | MTRNR2L7     | 0.43 | 1.7414E-51  |
| NREP-AS1    | 0.56 | 3.00829E-92 | ACAP2-IT1    | 0.43 | 1.74217E-51 |
| ANKRD30A    | 0.56 | 1.6399E-91  | AC104446.2   | 0.43 | 1.74678E-51 |
| MIR569      | 0.55 | 9.277E-91   | RNU6-375P    | 0.43 | 1.76794E-51 |
| PCDH9-AS4   | 0.55 | 1.078E-88   | AL136360.1   | 0.43 | 1.8155E-51  |
| RNU6-645P   | 0.55 | 1.10054E-87 | AC004223.1   | 0.43 | 2.11204E-51 |
| PTPRT-AS1   | 0.54 | 4.83839E-87 | ZNF410       | 0.43 | 2.14805E-51 |
| AP000462.1  | 0.54 | 7.16599E-87 | RNU6-625P    | 0.43 | 2.33402E-51 |
| AL139003.2  | 0.54 | 1.35546E-86 | PCDH9-AS2    | 0.43 | 2.39072E-51 |
| AC025031.3  | 0.54 | 3.19892E-86 | RPL7P39      | 0.43 | 2.58614E-51 |
| AC097493.1  | 0.54 | 5.96972E-86 | FDPSP2       | 0.43 | 2.77588E-51 |
| TOMM40P4    | 0.54 | 1.0363E-85  | AC016727.3   | 0.43 | 2.84546E-51 |
| NADK2-AS1   | 0.54 | 1.84012E-85 | AL136981.2   | 0.43 | 3.26001E-51 |
| RNU6-578P   | 0.54 | 2.04091E-85 | MIR376A2     | 0.43 | 3.2875E-51  |
| MTCO3P11    | 0.54 | 2.28195E-85 | AL133259.1   | 0.43 | 4.65851E-51 |
| MYB-AS1     | 0.54 | 2.68222E-85 | TUBAP12      | 0.43 | 6.06676E-51 |
| MIR3173     | 0.54 | 7.2137E-85  | AL354733.2   | 0.43 | 6.07892E-51 |
| MTCO2P29    | 0.54 | 1.89594E-84 | RPL39P14     | 0.43 | 7.23221E-51 |
| AP000462.3  | 0.54 | 5.61368E-84 | RHOA-IT1     | 0.43 | 8.06586E-51 |
| AC037193.1  | 0.54 | 7.05977E-84 | RNU6-654P    | 0.43 | 8.15342E-51 |
| RNU4-51P    | 0.54 | 7.41498E-84 | AC100821.1   | 0.43 | 8.24454E-51 |
| AL357568.1  | 0.54 | 1.42914E-83 | AC009230.1   | 0.43 | 9.45708E-51 |
| LDHBP3      | 0.54 | 1.5825E-83  | AC005183.1   | 0.43 | 1.01414E-50 |
| RNU2-13P    | 0.53 | 2.52972E-83 | AP000893.2   | 0.43 | 1.04814E-50 |
| RPS3AP14    | 0.53 | 5.52504E-83 | SELENOKP2    | 0.43 | 1.43569E-50 |
| MIR545      | 0.53 | 1.00071E-82 | TAS2R20      | 0.43 | 1.52508E-50 |
| AC092902.4  | 0.53 | 3.14034E-81 | AC098869.1   | 0.43 | 1.59336E-50 |
| AC239798.2  | 0.53 | 7.84425E-81 | AC113398.2   | 0.43 | 1.62084E-50 |
| AC010261.1  | 0.53 | 1.10223E-80 | RNU6-724P    | 0.43 | 1.72528E-50 |
| AC087427.1  | 0.53 | 1.2062E-80  | RNY4P20      | 0.43 | 1.76417E-50 |
| ANKRD20A5P  | 0.53 | 1.60932E-80 | AC005785.2   | 0.43 | 1.84973E-50 |
| RNU7-11P    | 0.53 | 2.00115E-80 | POC1B-AS1    | 0.43 | 2.37625E-50 |
| SOX5-AS1    | 0.53 | 2.87468E-80 | AC138150.1   | 0.43 | 2.40342E-50 |
| AL358779.1  | 0.53 | 4.09464E-80 | AC008625.1   | 0.43 | 2.55131E-50 |

|              |      |             |            |      |             |
|--------------|------|-------------|------------|------|-------------|
| AC099313.1   | 0.52 | 2.78983E-79 | AC015923.1 | 0.43 | 2.77732E-50 |
| COPRSP1      | 0.52 | 5.37191E-79 | AC107896.1 | 0.43 | 2.86259E-50 |
| FTX          | 0.52 | 1.84318E-78 | CNTN4-AS2  | 0.43 | 2.87379E-50 |
| MATR3        | 0.52 | 2.05027E-78 | RNU6-1007P | 0.43 | 3.0334E-50  |
| AC015971.1   | 0.52 | 2.70733E-78 | AC007000.2 | 0.43 | 3.16066E-50 |
| MTND5P14     | 0.52 | 3.58744E-78 | AP006565.1 | 0.43 | 4.00363E-50 |
| MTND4LP9     | 0.52 | 4.2651E-78  | TFAP2A-AS2 | 0.43 | 4.06439E-50 |
| AL133284.1   | 0.52 | 5.28131E-78 | AC008119.1 | 0.43 | 4.31938E-50 |
| MTND4P14     | 0.52 | 8.21682E-78 | AC114401.1 | 0.43 | 4.40485E-50 |
| AC008814.1   | 0.52 | 1.54482E-77 | RNU6-522P  | 0.42 | 5.3168E-50  |
| RNU7-46P     | 0.52 | 2.85563E-77 | TAS2R4     | 0.42 | 5.98532E-50 |
| AL133247.2   | 0.52 | 2.86949E-77 | SNORD74B   | 0.42 | 6.14115E-50 |
| CC2D2B       | 0.52 | 2.9524E-77  | AL606804.1 | 0.42 | 6.65022E-50 |
| CNTN4-AS1    | 0.52 | 7.00137E-77 | MIR626     | 0.42 | 7.24075E-50 |
| AP000462.2   | 0.52 | 9.47442E-77 | AC037198.1 | 0.42 | 7.36609E-50 |
| RNU6-617P    | 0.51 | 5.73961E-76 | ALG13-AS1  | 0.42 | 8.36479E-50 |
| SC4MOP       | 0.51 | 6.57989E-76 | AC025300.1 | 0.42 | 1.05745E-49 |
| MTCO2P11     | 0.51 | 8.83501E-76 | DOCK4-AS1  | 0.42 | 1.11869E-49 |
| LINC01861    | 0.51 | 3.8634E-75  | OR13G1     | 0.42 | 1.20795E-49 |
| MIR4505      | 0.51 | 3.97646E-75 | SNORD113-9 | 0.42 | 1.23595E-49 |
| AC008277.1   | 0.51 | 5.50134E-75 | RNA5SP28   | 0.42 | 1.2442E-49  |
| MIR920       | 0.51 | 1.46709E-74 | RNU6-1176P | 0.42 | 1.29878E-49 |
| SARNP        | 0.51 | 2.31534E-74 | AC131212.2 | 0.42 | 1.81212E-49 |
| MIR3671      | 0.51 | 3.62973E-74 | AL359885.1 | 0.42 | 2.3927E-49  |
| AC021078.1   | 0.51 | 4.67639E-74 | AC007695.1 | 0.42 | 2.44572E-49 |
| RNU7-38P     | 0.51 | 4.70762E-74 | AC010368.1 | 0.42 | 2.85455E-49 |
| AC004522.1   | 0.51 | 2.48744E-73 | AC025031.4 | 0.42 | 3.2362E-49  |
| RNASEH2B-AS1 | 0.50 | 4.67954E-73 | LINC02085  | 0.42 | 3.35734E-49 |
| GSTCD-AS1    | 0.50 | 4.84526E-73 | AC002044.3 | 0.42 | 3.73169E-49 |
| AC004217.1   | 0.50 | 6.40081E-73 | AC025576.2 | 0.42 | 4.08772E-49 |
| LINC01832    | 0.50 | 7.28895E-73 | RNU6-469P  | 0.42 | 4.99315E-49 |
| RNU4-24P     | 0.50 | 1.14242E-72 | SAP30L-AS1 | 0.42 | 5.07255E-49 |
| RNA5SP307    | 0.50 | 2.58271E-72 | AC005920.2 | 0.42 | 6.29745E-49 |
| RNU6-894P    | 0.50 | 2.72109E-72 | AC114980.1 | 0.42 | 8.41839E-49 |
| AF127577.2   | 0.50 | 6.87032E-72 | SOCS5P4    | 0.42 | 1.15115E-48 |
| SNRPCP11     | 0.50 | 9.03613E-72 | AC011825.2 | 0.42 | 1.15548E-48 |
| AC008868.1   | 0.50 | 1.93077E-71 | AC078809.1 | 0.42 | 1.36233E-48 |
| SIDT1-AS1    | 0.50 | 6.16717E-71 | AC006254.2 | 0.42 | 1.55463E-48 |
| AF127577.6   | 0.50 | 7.75122E-71 | CBX1P2     | 0.42 | 1.57928E-48 |
| AC018816.2   | 0.50 | 2.18044E-70 | AC005480.1 | 0.42 | 1.65847E-48 |
| Z94721.2     | 0.50 | 2.65912E-70 | AC016949.1 | 0.42 | 2.01301E-48 |
| RNU7-169P    | 0.50 | 2.81809E-70 | CDRT15P3   | 0.42 | 2.35342E-48 |

|            |      |             |             |      |             |
|------------|------|-------------|-------------|------|-------------|
| RN7SKP245  | 0.50 | 5.79494E-70 | AC093752.2  | 0.42 | 2.87816E-48 |
| AC025917.1 | 0.49 | 2.20708E-69 | AC009754.1  | 0.42 | 3.13319E-48 |
| RPS3AP19   | 0.49 | 2.32747E-69 | HMG1P12     | 0.42 | 3.33576E-48 |
| ENPP7P4    | 0.49 | 2.45765E-69 | RN7SKP253   | 0.42 | 4.32616E-48 |
| UBE2V2P2   | 0.49 | 3.81168E-69 | AC139792.2  | 0.42 | 4.3502E-48  |
| SRGAP3-AS3 | 0.49 | 4.92853E-69 | ANKRD61     | 0.42 | 4.5224E-48  |
| GTF2IP9    | 0.49 | 6.26076E-69 | Z93943.1    | 0.42 | 4.83198E-48 |
| AC064852.1 | 0.49 | 1.39803E-68 | AL391840.2  | 0.42 | 5.12056E-48 |
| ZBTB8OSP1  | 0.49 | 1.93087E-68 | AC090950.1  | 0.42 | 5.40195E-48 |
| LINC02614  | 0.49 | 2.07348E-68 | AC011586.1  | 0.42 | 5.49941E-48 |
| POTEE      | 0.49 | 2.985E-68   | TAS2R15P    | 0.42 | 7.36314E-48 |
| AC007919.1 | 0.49 | 3.70502E-68 | RNU6ATAC31P | 0.42 | 7.78135E-48 |
| AC114786.3 | 0.49 | 4.52611E-68 | LNK1-AS1    | 0.42 | 1.00571E-47 |
| AC004415.1 | 0.49 | 4.68242E-68 | RNU6-1275P  | 0.42 | 1.02703E-47 |
| NDUFV2     | 0.49 | 7.88961E-68 | AL139407.1  | 0.42 | 1.06463E-47 |
| AC083870.1 | 0.49 | 8.26364E-68 | AC108471.3  | 0.42 | 1.07068E-47 |
| RNU6-876P  | 0.49 | 8.69152E-68 | AC005702.2  | 0.42 | 1.16786E-47 |
| Z83843.1   | 0.49 | 9.82577E-68 | AC013410.1  | 0.42 | 1.20978E-47 |
| AC091117.2 | 0.49 | 1.6685E-67  | AC004865.1  | 0.42 | 1.34752E-47 |
| AC068790.6 | 0.49 | 3.10908E-67 | ETF1P1      | 0.41 | 1.60903E-47 |
| RN7SL314P  | 0.48 | 2.02852E-66 | DDX3P2      | 0.41 | 1.86547E-47 |
| AL391427.1 | 0.48 | 3.70775E-66 | SPICE1      | 0.41 | 1.97282E-47 |
| AL121584.1 | 0.48 | 4.64669E-66 | LINC01906   | 0.41 | 2.08834E-47 |
| AP002991.2 | 0.48 | 7.24975E-66 | RPL26P27    | 0.41 | 2.21337E-47 |
| AC011399.1 | 0.48 | 8.15581E-66 | AC004223.2  | 0.41 | 2.55479E-47 |
| UGT1A3     | 0.48 | 8.531E-66   | AL137847.1  | 0.41 | 2.63159E-47 |
| AC130651.1 | 0.48 | 1.24966E-65 | RPL35AP14   | 0.41 | 3.27569E-47 |
| HOXB-AS2   | 0.48 | 1.38319E-65 | AL607077.1  | 0.41 | 3.56994E-47 |
| AC069549.1 | 0.48 | 1.53992E-65 | AC011373.1  | 0.41 | 3.78563E-47 |
| AC087258.1 | 0.48 | 2.18023E-65 | RNU6-1165P  | 0.41 | 4.20099E-47 |
| RNU6-335P  | 0.48 | 3.04833E-65 | RNU4-56P    | 0.41 | 4.74253E-47 |
| RNA5SP237  | 0.48 | 4.49085E-65 | LANCL1-AS1  | 0.41 | 5.0815E-47  |
| RNU6-905P  | 0.48 | 6.22523E-65 | TTC3-AS1    | 0.41 | 5.15091E-47 |
| AC087260.1 | 0.48 | 6.96308E-65 | PRSS37      | 0.41 | 5.42208E-47 |
| RNU5A-6P   | 0.48 | 7.37522E-65 | MTND2P2     | 0.41 | 5.56598E-47 |
| MIR553     | 0.48 | 9.56536E-65 | AC117500.2  | 0.41 | 5.68576E-47 |
| AC004812.1 | 0.48 | 1.36169E-64 | MTND5P26    | 0.41 | 5.77333E-47 |
| AL163153.1 | 0.48 | 1.87713E-64 | CSNK1G2P1   | 0.41 | 6.1605E-47  |
| OPA1-AS1   | 0.48 | 4.3432E-64  | NBPF5P      | 0.41 | 6.30031E-47 |
| RNY1P14    | 0.47 | 1.16334E-63 | MIR1284     | 0.41 | 7.15407E-47 |
| AC139792.1 | 0.47 | 1.8356E-63  | AC110813.1  | 0.41 | 8.20921E-47 |
| AC091889.1 | 0.47 | 2.43712E-63 | ANKRD26P4   | 0.41 | 8.4371E-47  |



|              |      |             |              |      |             |
|--------------|------|-------------|--------------|------|-------------|
| MIR3134      | 0.47 | 2.83038E-63 | AL360091.2   | 0.41 | 8.67909E-47 |
| Z99129.1     | 0.47 | 3.65667E-63 | MTND4P32     | 0.41 | 8.92578E-47 |
| RAD17P1      | 0.47 | 3.83206E-63 | PCDHA9       | 0.41 | 9.98996E-47 |
| AC010632.3   | 0.47 | 4.17792E-63 | RNU5E-3P     | 0.41 | 1.01342E-46 |
| RNU6-1209P   | 0.47 | 5.8338E-63  | COX6CP15     | 0.41 | 1.02707E-46 |
| RNU4ATAC7P   | 0.47 | 8.96955E-63 | AC008752.3   | 0.41 | 1.12985E-46 |
| AC008147.2   | 0.47 | 9.51771E-63 | NACAP10      | 0.41 | 1.14288E-46 |
| AC002064.2   | 0.47 | 1.14321E-62 | AC092881.1   | 0.41 | 1.27168E-46 |
| RNU6-1005P   | 0.47 | 1.32381E-62 | RNU6-890P    | 0.41 | 1.36536E-46 |
| CDRT15P4     | 0.47 | 1.3294E-62  | SNORD96B     | 0.41 | 1.66158E-46 |
| AC008937.2   | 0.47 | 1.37628E-62 | THRB-IT1     | 0.41 | 1.67832E-46 |
| LINC00894    | 0.47 | 1.46986E-62 | INTS9-AS1    | 0.41 | 1.93008E-46 |
| RPL5P13      | 0.47 | 1.76159E-62 | AC093752.1   | 0.41 | 2.1682E-46  |
| MIR509-1     | 0.47 | 2.60502E-62 | AL136221.1   | 0.41 | 2.54294E-46 |
| PRICKLE2-AS3 | 0.47 | 2.92153E-62 | AP006248.1   | 0.41 | 2.55352E-46 |
| AC068189.2   | 0.47 | 4.36649E-62 | AC006059.1   | 0.41 | 2.5824E-46  |
| AC018797.3   | 0.47 | 4.92832E-62 | ENPP7P14     | 0.41 | 3.01186E-46 |
| RPL31P20     | 0.47 | 5.98546E-62 | RNU6-206P    | 0.41 | 3.25898E-46 |
| JPX          | 0.47 | 7.71628E-62 | RPL7P26      | 0.41 | 3.6326E-46  |
| AL391840.3   | 0.47 | 7.8646E-62  | AC078882.1   | 0.41 | 3.92909E-46 |
| PIGFP2       | 0.47 | 1.18736E-61 | EIF1AX-AS1   | 0.41 | 4.3712E-46  |
| CYP4F30P     | 0.47 | 1.20359E-61 | ARHGAP16P    | 0.41 | 4.7096E-46  |
| AL513185.2   | 0.47 | 1.74778E-61 | AC063965.2   | 0.41 | 7.01352E-46 |
| AC069549.2   | 0.47 | 1.77129E-61 | AC098798.1   | 0.41 | 7.92086E-46 |
| RPS26P5      | 0.47 | 3.46954E-61 | AP005899.1   | 0.41 | 8.55745E-46 |
| MIR606       | 0.47 | 3.47304E-61 | RNU7-19P     | 0.41 | 9.0299E-46  |
| AC139792.3   | 0.47 | 3.72859E-61 | AC008758.2   | 0.41 | 1.09898E-45 |
| AC093416.2   | 0.47 | 6.41134E-61 | GPR141BP     | 0.41 | 1.12964E-45 |
| MIR4526      | 0.47 | 6.48118E-61 | AL117339.3   | 0.41 | 1.32765E-45 |
| MTCO1P11     | 0.47 | 7.40838E-61 | AC005104.2   | 0.41 | 1.32935E-45 |
| SNORA70E     | 0.46 | 8.89569E-61 | AC010265.1   | 0.41 | 1.34189E-45 |
| AF178030.1   | 0.46 | 1.33652E-60 | AC110760.2   | 0.41 | 1.3863E-45  |
| AC034186.2   | 0.46 | 2.24793E-60 | AC133555.6   | 0.41 | 1.60585E-45 |
| PBX1-AS1     | 0.46 | 2.33978E-60 | RNU6-742P    | 0.41 | 1.76225E-45 |
| RNU6-1003P   | 0.46 | 2.52198E-60 | AC087235.1   | 0.41 | 1.84607E-45 |
| ARHGEF38-IT1 | 0.46 | 3.59388E-60 | AC007673.1   | 0.41 | 2.31151E-45 |
| AC091059.1   | 0.46 | 3.66108E-60 | AC010623.1   | 0.41 | 2.53977E-45 |
| MAST4-IT1    | 0.46 | 8.68889E-60 | AC025918.1   | 0.41 | 2.55631E-45 |
| TUBBP3       | 0.46 | 9.86969E-60 | UHRF2P1      | 0.41 | 2.77601E-45 |
| ANKRD20A11P  | 0.46 | 1.25026E-59 | ADAMTS19-AS1 | 0.41 | 2.79056E-45 |
| AC138832.1   | 0.46 | 1.71936E-59 | LRRC37A17P   | 0.41 | 2.91769E-45 |
| AC007684.1   | 0.46 | 1.90708E-59 | LRRC19       | 0.41 | 3.10636E-45 |

|                 |      |             |             |      |             |
|-----------------|------|-------------|-------------|------|-------------|
| CYP3A7-CYP3A51P | 0.46 | 2.70546E-59 | MIR4796     | 0.41 | 3.20014E-45 |
| AC037487.2      | 0.46 | 3.24593E-59 | AC090617.7  | 0.41 | 3.36331E-45 |
| AC108063.1      | 0.46 | 3.44594E-59 | RN7SL418P   | 0.41 | 3.49419E-45 |
| AC012358.1      | 0.46 | 4.63136E-59 | AC022726.2  | 0.40 | 3.5701E-45  |
| RHOT1P1         | 0.46 | 4.87668E-59 | AC009220.2  | 0.40 | 3.59159E-45 |
| AC008873.1      | 0.46 | 4.94395E-59 | ZC3H11A     | 0.40 | 3.70404E-45 |
| PRDX3P4         | 0.46 | 5.39565E-59 | AC092794.1  | 0.40 | 4.5256E-45  |
| DNAJC19P1       | 0.46 | 7.65135E-59 | AC005899.5  | 0.40 | 4.92678E-45 |
| AL136115.2      | 0.46 | 7.90654E-59 | AL591848.3  | 0.40 | 5.18423E-45 |
| MIR548AX        | 0.46 | 7.97398E-59 | AC090617.8  | 0.40 | 5.617E-45   |
| GCNT1P1         | 0.46 | 8.16642E-59 | AC072022.1  | 0.40 | 5.94349E-45 |
| TCEAL3-AS1      | 0.46 | 1.35621E-58 | MTCO3P19    | 0.40 | 5.98129E-45 |
| AC098869.2      | 0.46 | 1.41159E-58 | RAB11FIP1P1 | 0.40 | 6.89895E-45 |
| ATG12P2         | 0.46 | 1.4587E-58  | AC109454.4  | 0.40 | 7.61325E-45 |
| MIR346          | 0.46 | 1.4667E-58  | AC004492.1  | 0.40 | 7.88492E-45 |
| AC011451.2      | 0.46 | 2.34391E-58 | RNU6-181P   | 0.40 | 8.45095E-45 |
| ANKHD1          | 0.46 | 2.68253E-58 | AP002961.1  | 0.40 | 8.93774E-45 |
| OR9H1P          | 0.46 | 3.17806E-58 | GNRHR       | 0.40 | 8.98013E-45 |
| AL512283.1      | 0.46 | 3.73661E-58 | CYP3A7      | 0.40 | 1.10188E-44 |
| ANKRD49P1       | 0.46 | 3.86095E-58 | CENPCP1     | 0.40 | 1.34889E-44 |
| RNU6-786P       | 0.45 | 6.07455E-58 | MIR491      | 0.40 | 1.46935E-44 |
| MIR3936HG       | 0.45 | 6.44436E-58 | KCNMA1-AS2  | 0.40 | 1.47537E-44 |
| AF181450.1      | 0.45 | 7.18109E-58 | AC104365.1  | 0.40 | 1.67611E-44 |
| MRPS36P2        | 0.45 | 1.3498E-57  | FAM185BP    | 0.40 | 1.84575E-44 |
| RNF113B         | 0.45 | 1.42423E-57 | AC018462.1  | 0.40 | 1.88617E-44 |
| MTATP6P19       | 0.45 | 1.64544E-57 | AC068724.4  | 0.40 | 1.98586E-44 |
| AC145146.1      | 0.45 | 2.83686E-57 | AC134050.1  | 0.40 | 2.11834E-44 |
| RNU6-750P       | 0.45 | 2.94677E-57 | RNU6-608P   | 0.40 | 2.15048E-44 |
| RNU7-130P       | 0.45 | 3.24165E-57 | AC019226.1  | 0.40 | 2.20388E-44 |
| AC092903.2      | 0.45 | 6.15147E-57 | AC008770.3  | 0.40 | 2.28612E-44 |
| AF064866.1      | 0.45 | 9.07765E-57 | ANKRD20A21P | 0.40 | 2.60352E-44 |
| AC110760.1      | 0.45 | 9.11398E-57 | RNU6-586P   | 0.40 | 2.81172E-44 |
| AC068790.2      | 0.45 | 9.30715E-57 | AF064863.1  | 0.40 | 2.84355E-44 |
| MTATP6P11       | 0.45 | 9.97079E-57 | AC097500.1  | 0.40 | 3.12442E-44 |
| MIR4774         | 0.45 | 1.06949E-56 | AC087632.2  | 0.40 | 3.26837E-44 |
| RNA5SP168       | 0.45 | 1.19607E-56 | AC011755.1  | 0.40 | 3.47043E-44 |
| AL392023.2      | 0.45 | 1.34189E-56 | AC010761.3  | 0.40 | 3.74055E-44 |
| MIR582          | 0.45 | 1.43479E-56 | LINC00216   | 0.40 | 3.85304E-44 |
| AL049840.6      | 0.45 | 1.59782E-56 | AC113385.2  | 0.40 | 4.28627E-44 |
| AC113340.2      | 0.45 | 2.7931E-56  | SNRPGP18    | 0.40 | 4.53599E-44 |
| LINC00517       | 0.45 | 2.96756E-56 | AC087854.1  | 0.40 | 4.55282E-44 |
| AC005343.4      | 0.45 | 3.51377E-56 | MIR651      | 0.40 | 4.61001E-44 |

---

|            |      |             |              |      |             |
|------------|------|-------------|--------------|------|-------------|
| ASTN2-AS1  | 0.45 | 4.58326E-56 | AL359880.1   | 0.40 | 4.74741E-44 |
| MTRNR2L4   | 0.45 | 4.92848E-56 | OR11L1       | 0.40 | 5.69438E-44 |
| AC104126.1 | 0.45 | 5.1E-56     | AC073569.1   | 0.40 | 7.12456E-44 |
| AL451064.2 | 0.45 | 5.49905E-56 | ANKRD36      | 0.40 | 7.71426E-44 |
| AC009365.3 | 0.45 | 6.43543E-56 | SCYL2P1      | 0.40 | 8.02704E-44 |
| TAS2R6P    | 0.45 | 7.71192E-56 | RNU7-70P     | 0.40 | 8.69117E-44 |
| AC010261.2 | 0.45 | 1.13891E-55 | AC004765.1   | 0.40 | 9.28289E-44 |
| AC008147.1 | 0.45 | 1.16916E-55 | AC024267.5   | 0.40 | 1.10174E-43 |
| NCKAP5-IT1 | 0.45 | 1.30087E-55 | OR6F1        | 0.40 | 1.11407E-43 |
| ZFAT-AS1   | 0.45 | 1.31718E-55 | AL138752.1   | 0.40 | 1.15301E-43 |
| AC134669.1 | 0.45 | 1.37758E-55 | AC007684.2   | 0.40 | 1.18231E-43 |
| AP005131.3 | 0.45 | 2.02955E-55 | AL121652.1   | 0.40 | 1.19603E-43 |
| CFAP70     | 0.45 | 2.18701E-55 | AC108449.1   | 0.40 | 1.22001E-43 |
| BBIP1      | 0.45 | 2.24861E-55 | AC106791.2   | 0.40 | 1.29786E-43 |
| AC007619.1 | 0.45 | 2.6075E-55  | AC018926.3   | 0.40 | 1.35932E-43 |
| AC114812.1 | 0.44 | 3.23418E-55 | RNU6-719P    | 0.40 | 1.40836E-43 |
| AC015563.2 | 0.44 | 3.89381E-55 | RNU6-836P    | 0.40 | 1.42259E-43 |
| AC114763.2 | 0.44 | 3.90834E-55 | MIR4698      | 0.40 | 1.53017E-43 |
| AC018511.1 | 0.44 | 4.50991E-55 | RN7SL495P    | 0.40 | 1.77688E-43 |
| LRP1B      | 0.44 | 5.49084E-55 | AC007435.1   | 0.40 | 1.80423E-43 |
| AC090424.1 | 0.44 | 6.47956E-55 | RNY4P7       | 0.40 | 1.93465E-43 |
| AL049780.2 | 0.44 | 7.55575E-55 | PRICKLE2-AS2 | 0.40 | 2.08175E-43 |
| RNU6-1093P | 0.44 | 8.39242E-55 | AL031601.1   | 0.40 | 2.19538E-43 |
| RNU6-82P   | 0.44 | 9.77713E-55 | NEGR1-IT1    | 0.40 | 2.38653E-43 |
| USP3-AS1   | 0.44 | 1.00264E-54 | RNU6-310P    | 0.40 | 2.53896E-43 |
| MIR3174    | 0.44 | 1.07175E-54 | RNU6-769P    | 0.40 | 2.58764E-43 |
| PCDH9-AS3  | 0.44 | 1.12863E-54 | AL139805.1   | 0.40 | 2.84555E-43 |
| AC114763.1 | 0.44 | 1.14194E-54 | MTCO3P15     | 0.40 | 2.89716E-43 |
| AC117528.1 | 0.44 | 1.26738E-54 | PRH2         | 0.40 | 3.43744E-43 |
| AC012370.1 | 0.44 | 1.9672E-54  | AC009228.2   | 0.40 | 3.63572E-43 |
| OR2X1P     | 0.44 | 2.07241E-54 | AC106037.3   | 0.40 | 3.81554E-43 |
| LYST-AS1   | 0.44 | 2.36694E-54 | AL161457.2   | 0.40 | 4.52901E-43 |
| SNX9-AS1   | 0.44 | 2.85425E-54 | RORA-AS2     | 0.40 | 4.60721E-43 |
| AC092794.2 | 0.44 | 2.87507E-54 | MIR6809      | 0.40 | 4.62257E-43 |
| TH2LCRR    | 0.44 | 3.55952E-54 | KRT18P7      | 0.40 | 4.68472E-43 |
| OR1C1      | 0.44 | 4.11848E-54 | SNORA70G     | 0.40 | 5.11418E-43 |
| AC140481.3 | 0.44 | 4.35831E-54 | AC069437.1   | 0.40 | 5.35909E-43 |
| AC130462.1 | 0.44 | 5.12105E-54 | EFCAB13      | 0.40 | 5.49773E-43 |
| AC005740.3 | 0.44 | 5.23653E-54 | AC026725.1   | 0.40 | 5.5819E-43  |
|            |      |             | AP000465.1   | 0.40 | 6.65912E-43 |

---

**Table S3.** Genes significantly correlated with LINC01087 expression in esophageal carcinoma (TGCA).

| Gene symbol | Positive R value | P-value     | Gene symbol | Positive R value | P-value     |
|-------------|------------------|-------------|-------------|------------------|-------------|
| POTEKP      | 0.95             | 1.09316E-85 | GNAS-AS1    | 0.50             | 8.33291E-12 |
| AC093838.1  | 0.93             | 5.11746E-73 | GABRA2      | 0.50             | 8.36137E-12 |
| SNX18P23    | 0.82             | 1.68543E-41 | AC119868.1  | 0.50             | 8.47415E-12 |
| LINC00454   | 0.81             | 5.62255E-39 | DSCR8       | 0.50             | 8.67473E-12 |
| AC119751.6  | 0.79             | 1.86856E-35 | RNU6-603P   | 0.50             | 9.56928E-12 |
| AL731769.2  | 0.78             | 5.02683E-35 | NF1P11      | 0.50             | 9.93537E-12 |
| NEFH        | 0.78             | 1.40373E-34 | MRGPRX13P   | 0.50             | 1.03476E-11 |
| AL772337.2  | 0.77             | 3.14327E-33 | SLC25A1P3   | 0.50             | 1.04975E-11 |
| AL138773.1  | 0.77             | 3.62654E-33 | AP000553.5  | 0.50             | 1.06419E-11 |
| GFY         | 0.76             | 5.16646E-32 | HPR         | 0.50             | 1.16944E-11 |
| MAGEA8      | 0.75             | 2.76483E-31 | LINC02175   | 0.50             | 1.25396E-11 |
| CTSLP8      | 0.75             | 4.27748E-31 | PRPH2       | 0.50             | 1.38312E-11 |
| AL772337.1  | 0.75             | 9.35574E-31 | AC007996.1  | 0.50             | 1.41033E-11 |
| GNG13       | 0.75             | 2.76929E-30 | AP000428.1  | 0.50             | 1.4159E-11  |
| ZSCAN10     | 0.75             | 2.86903E-30 | NXNL2       | 0.50             | 1.41644E-11 |
| AC083836.1  | 0.74             | 4.25815E-30 | C8orf37     | 0.50             | 1.4697E-11  |
| CDH18       | 0.74             | 1.16838E-29 | C5orf58     | 0.50             | 1.5424E-11  |
| BX072579.2  | 0.74             | 1.75031E-29 | GPAT2       | 0.50             | 6.44467E-12 |
| AL445584.2  | 0.74             | 3.56406E-29 | SUMO2P19    | 0.50             | 6.49208E-12 |
| FIGN        | 0.73             | 5.93578E-29 | MIR548F1    | 0.50             | 6.64905E-12 |
| GRAMD4P3    | 0.73             | 2.91815E-28 | ZNF280B     | 0.50             | 6.88797E-12 |
| OLFM3       | 0.73             | 4.89372E-28 | AP001267.3  | 0.50             | 7.26237E-12 |
| SLITRK1     | 0.73             | 5.12214E-28 | AC019294.2  | 0.50             | 7.7951E-12  |
| TAC3        | 0.73             | 6.04703E-28 | AJ239318.1  | 0.50             | 1.54911E-11 |
| GABRG1      | 0.72             | 1.20499E-27 | KLF2P4      | 0.50             | 1.69967E-11 |
| ZFR2        | 0.72             | 1.22799E-27 | AL355516.1  | 0.50             | 1.84856E-11 |
| AC109472.1  | 0.72             | 1.5551E-27  | GRIN1       | 0.49             | 2.17785E-11 |
| ZNF317P1    | 0.72             | 1.76359E-27 | AC092634.3  | 0.49             | 2.18535E-11 |
| KLHL1       | 0.72             | 2.07296E-27 | GLUD1P3     | 0.49             | 2.19774E-11 |
| TNN         | 0.72             | 2.16239E-27 | H3P9        | 0.49             | 2.25843E-11 |
| RASL10A     | 0.72             | 2.16712E-27 | AP000347.1  | 0.49             | 2.33047E-11 |
| AC018558.2  | 0.72             | 2.76222E-27 | CCDC114     | 0.49             | 2.34575E-11 |
| AC103746.1  | 0.72             | 3.05669E-27 | TPBGL       | 0.49             | 2.36581E-11 |
| MIR5692B    | 0.72             | 3.69344E-27 | MTCO3P10    | 0.49             | 2.65801E-11 |
| LINC01297   | 0.72             | 3.78484E-27 | AC093642.3  | 0.49             | 2.76987E-11 |
| H2BU2P      | 0.72             | 4.22478E-27 | AC012339.1  | 0.49             | 2.79169E-11 |
| DPEP3       | 0.72             | 4.9596E-27  | AL162386.1  | 0.49             | 2.79949E-11 |

|             |      |             |            |      |             |
|-------------|------|-------------|------------|------|-------------|
| PCDH15      | 0.72 | 5.59256E-27 | PLIN5      | 0.49 | 2.81168E-11 |
| TTY23       | 0.72 | 5.89284E-27 | MYBL1      | 0.49 | 2.95368E-11 |
| FP236240.2  | 0.72 | 5.89284E-27 | EPOR       | 0.49 | 3.1628E-11  |
| CR381670.1  | 0.71 | 9.42868E-27 | PTH2R      | 0.49 | 3.66177E-11 |
| TMEFF2      | 0.71 | 1.1208E-26  | AP000705.1 | 0.49 | 3.74381E-11 |
| AL354919.1  | 0.71 | 1.31236E-26 | AL157823.2 | 0.49 | 3.90351E-11 |
| GRIN3A      | 0.71 | 1.52323E-26 | EEF1A2     | 0.49 | 3.98083E-11 |
| LINC00351   | 0.71 | 1.75196E-26 | AC068620.3 | 0.49 | 4.01319E-11 |
| ASZ1        | 0.71 | 1.84376E-26 | AC087175.1 | 0.49 | 4.25604E-11 |
| SKIDA1      | 0.71 | 2.45288E-26 | SAA3P      | 0.49 | 4.40515E-11 |
| AC092447.5  | 0.71 | 3.58466E-26 | AP000350.5 | 0.49 | 5.03953E-11 |
| AL157931.2  | 0.71 | 3.72781E-26 | LINC02088  | 0.49 | 5.16291E-11 |
| AL353709.1  | 0.71 | 4.99546E-26 | AL356776.2 | 0.49 | 5.20399E-11 |
| AC079799.2  | 0.70 | 1.06502E-25 | RNU7-123P  | 0.49 | 5.21595E-11 |
| ANGPT1      | 0.70 | 1.08601E-25 | Z99129.3   | 0.48 | 5.51672E-11 |
| SEMA3E      | 0.70 | 1.1739E-25  | GTF2IP3    | 0.48 | 5.52647E-11 |
| AL157931.1  | 0.70 | 1.99742E-25 | PPIAP47    | 0.48 | 5.61765E-11 |
| MIR4666A    | 0.70 | 2.10511E-25 | BX088651.2 | 0.48 | 5.63293E-11 |
| LINC01606   | 0.70 | 2.2184E-25  | OR1X5P     | 0.48 | 6.00084E-11 |
| AC099786.2  | 0.70 | 2.79294E-25 | MAP3K12    | 0.48 | 6.42725E-11 |
| AL035603.1  | 0.70 | 3.09088E-25 | GTF2H4     | 0.48 | 6.45195E-11 |
| OR8B5P      | 0.70 | 3.12168E-25 | DLGAP4-AS1 | 0.48 | 6.64374E-11 |
| RNU7-69P    | 0.70 | 3.75487E-25 | AC073896.4 | 0.48 | 6.72719E-11 |
| AL353784.1  | 0.70 | 4.08996E-25 | AL096701.4 | 0.48 | 6.91611E-11 |
| Z84485.1    | 0.70 | 4.88851E-25 | TUBB8      | 0.48 | 7.22132E-11 |
| AL512310.11 | 0.70 | 5.55334E-25 | AL137001.2 | 0.48 | 7.50446E-11 |
| SEMA3D      | 0.70 | 6.08486E-25 | DDX11L16   | 0.48 | 7.81856E-11 |
| AC099786.3  | 0.69 | 1.06437E-24 | OR8B2      | 0.48 | 7.9119E-11  |
| AC135803.1  | 0.69 | 1.45155E-24 | AC019185.1 | 0.48 | 8.16146E-11 |
| H4C10P      | 0.69 | 2.01931E-24 | DPY19L2    | 0.48 | 8.36955E-11 |
| AGGF1P6     | 0.69 | 2.2695E-24  | PPOX       | 0.48 | 8.42236E-11 |
| HSP90AB7P   | 0.69 | 2.3077E-24  | UFL1-AS1   | 0.48 | 1.12179E-10 |
| MAB21L2     | 0.69 | 5.27205E-24 | AC129492.4 | 0.48 | 1.13154E-10 |
| GDPD4       | 0.68 | 6.53225E-24 | AL160286.2 | 0.48 | 1.16444E-10 |
| SNHG31      | 0.68 | 6.81337E-24 | AL078605.1 | 0.48 | 1.17477E-10 |
| AC099786.1  | 0.68 | 7.60421E-24 | MTND1P4    | 0.48 | 1.241E-10   |
| NUS1P2      | 0.68 | 7.65841E-24 | TEX38      | 0.48 | 1.24983E-10 |
| MED15P1     | 0.68 | 8.05175E-24 | AL139288.2 | 0.48 | 1.29651E-10 |
| AL391840.3  | 0.68 | 9.34035E-24 | CRTC3-AS1  | 0.48 | 1.38368E-10 |
| ATXN8OS     | 0.68 | 1.54292E-23 | AL138831.1 | 0.48 | 1.40436E-10 |
| MTCO3P4     | 0.68 | 1.83341E-23 | GATA3      | 0.48 | 1.43757E-10 |
| GABBR2      | 0.68 | 1.9054E-23  | AC090099.1 | 0.48 | 1.44449E-10 |

|                |      |             |             |      |             |
|----------------|------|-------------|-------------|------|-------------|
| PTH2           | 0.68 | 2.35374E-23 | AL034348.1  | 0.48 | 1.47961E-10 |
| HAPLN1         | 0.68 | 2.84824E-23 | AL035530.2  | 0.47 | 1.63038E-10 |
| RTBDN          | 0.68 | 3.73421E-23 | FRG2B       | 0.47 | 1.71602E-10 |
| AC020584.1     | 0.68 | 4.28429E-23 | AC091133.3  | 0.47 | 1.76755E-10 |
| GRAMD4P8       | 0.68 | 4.68084E-23 | AL024498.1  | 0.47 | 1.80905E-10 |
| RNU6-54P       | 0.67 | 6.31793E-23 | PTCHD3      | 0.47 | 1.83172E-10 |
| LINC01231      | 0.67 | 6.62681E-23 | LINC00664   | 0.47 | 1.85986E-10 |
| AC018558.7     | 0.67 | 9.38758E-23 | OR8G1       | 0.47 | 1.87039E-10 |
| AL445207.1     | 0.67 | 9.60459E-23 | AC118282.2  | 0.47 | 1.95739E-10 |
| AL031658.1     | 0.67 | 2.48605E-22 | MTND5P7     | 0.47 | 1.9592E-10  |
| NR2F2          | 0.67 | 3.01142E-22 | UTS2R       | 0.47 | 2.28635E-10 |
| AL391840.2     | 0.66 | 4.91725E-22 | AL133255.1  | 0.47 | 2.31943E-10 |
| CITED2         | 0.66 | 5.08729E-22 | BMP3        | 0.47 | 2.3541E-10  |
| NLGN1          | 0.66 | 5.34278E-22 | CCDC78      | 0.47 | 2.38808E-10 |
| AP000255.1     | 0.66 | 6.35991E-22 | FRG2JP      | 0.47 | 2.53001E-10 |
| AC087477.2     | 0.66 | 6.4587E-22  | LINC01143   | 0.47 | 2.56356E-10 |
| PSMA8          | 0.66 | 8.22758E-22 | GUSBP10     | 0.47 | 2.70456E-10 |
| SNX18P12       | 0.66 | 8.251E-22   | AL512624.1  | 0.47 | 2.75669E-10 |
|                |      |             | SUGT1P4-    |      |             |
| LINC02663      | 0.66 | 8.35745E-22 | STRA6LP     | 0.47 | 2.9294E-10  |
| GRIA2          | 0.66 | 1.36835E-21 | MTND6P29    | 0.47 | 3.00421E-10 |
| <b>MED15P4</b> | 0.66 | 1.50577E-21 | OR8B3       | 0.47 | 3.19257E-10 |
| SKP1P3         | 0.66 | 1.89651E-21 | PIFO        | 0.47 | 3.33994E-10 |
| AC099520.1     | 0.65 | 2.89626E-21 | SYT5        | 0.47 | 3.37446E-10 |
| AC118282.1     | 0.65 | 3.38033E-21 | AL645608.4  | 0.47 | 3.42846E-10 |
| AC079466.2     | 0.65 | 4.13908E-21 | AGGF1P10    | 0.47 | 3.46215E-10 |
| GBX2           | 0.65 | 4.78135E-21 | AL591222.2  | 0.47 | 3.49052E-10 |
| OR8D1          | 0.65 | 5.16127E-21 | ERICD       | 0.47 | 3.66783E-10 |
| Z98745.2       | 0.65 | 6.18735E-21 | CROCC2      | 0.47 | 3.9032E-10  |
| AC004408.2     | 0.65 | 6.98716E-21 | MTATP6P10   | 0.46 | 4.04044E-10 |
| SNX18P25       | 0.65 | 7.52059E-21 | AL391650.2  | 0.46 | 4.09956E-10 |
| AC092447.2     | 0.65 | 7.8462E-21  | SLC25A30    | 0.46 | 4.42105E-10 |
| MDGA2          | 0.65 | 8.66783E-21 | DUX4L37     | 0.46 | 4.53948E-10 |
| SPACA6P-AS     | 0.65 | 8.74371E-21 | AC020907.5  | 0.46 | 4.58452E-10 |
| GRIA4          | 0.65 | 9.70669E-21 | ELK2BP      | 0.46 | 5.09112E-10 |
| POTEH          | 0.65 | 1.05948E-20 | CILP2       | 0.46 | 5.62452E-10 |
| AC005006.1     | 0.64 | 1.86706E-20 | AC130650.2  | 0.46 | 5.8173E-10  |
| LINC00452      | 0.64 | 1.92668E-20 | GJD2        | 0.46 | 6.06647E-10 |
| AL451064.1     | 0.64 | 2.14049E-20 | AL512310.10 | 0.46 | 6.15505E-10 |
| LINC02571      | 0.64 | 2.32026E-20 | HERC2P8     | 0.46 | 6.2085E-10  |
| MDM1           | 0.64 | 2.61446E-20 | EID3        | 0.46 | 6.32517E-10 |
| HABP4          | 0.64 | 2.97611E-20 | LRRN3       | 0.46 | 6.36802E-10 |

|            |      |             |            |      |             |
|------------|------|-------------|------------|------|-------------|
| CAVIN2-AS1 | 0.64 | 3.5762E-20  | SBNO1-AS1  | 0.46 | 7.2122E-10  |
| DNM3       | 0.64 | 3.67607E-20 | LINC01695  | 0.46 | 7.38592E-10 |
| AC099654.5 | 0.64 | 3.75595E-20 | AL929601.2 | 0.46 | 7.83783E-10 |
| SLC2A11    | 0.64 | 3.77524E-20 | LINC01673  | 0.46 | 7.87122E-10 |
| CDH12P4    | 0.64 | 4.0384E-20  | BANF1P2    | 0.46 | 8.27436E-10 |
| LHX8       | 0.64 | 4.38174E-20 | ZNF467     | 0.46 | 8.45871E-10 |
| HMGB1P46   | 0.64 | 5.6998E-20  | AC092720.2 | 0.46 | 9.20473E-10 |
| AP000553.7 | 0.64 | 5.83176E-20 | FOXN4      | 0.46 | 9.26626E-10 |
| DSCR10     | 0.64 | 6.1018E-20  | DDX43      | 0.46 | 9.31653E-10 |
| CATIP      | 0.64 | 6.46267E-20 | TLCD5      | 0.46 | 9.35509E-10 |
| AL731769.1 | 0.64 | 6.47645E-20 | AP000446.1 | 0.46 | 9.56618E-10 |
| GLRB       | 0.64 | 7.79435E-20 | CT45A10    | 0.46 | 9.97483E-10 |
| AL590491.2 | 0.64 | 8.30469E-20 | AC084876.2 | 0.45 | 1.07743E-09 |
| TP53TG3HP  | 0.63 | 9.87126E-20 | GDF9       | 0.45 | 1.08102E-09 |
| AC025674.1 | 0.63 | 9.98026E-20 | SAMD11     | 0.45 | 1.1043E-09  |
| RNU6-334P  | 0.63 | 1.05051E-19 | AC118282.4 | 0.45 | 1.1628E-09  |
| MIR1915HG  | 0.63 | 1.05664E-19 | FOXI1      | 0.45 | 1.27356E-09 |
| AC142116.2 | 0.63 | 1.28544E-19 | PLA2G12AP1 | 0.45 | 1.28504E-09 |
| CDH19      | 0.63 | 1.34602E-19 | FAM238C    | 0.45 | 1.30211E-09 |
| FTLP12     | 0.63 | 1.53245E-19 | LIX1       | 0.45 | 1.47511E-09 |
| AC068205.1 | 0.63 | 1.587E-19   | AP003900.1 | 0.45 | 1.47728E-09 |
| NTSR2      | 0.63 | 2.97236E-19 | AC129850.1 | 0.45 | 1.48898E-09 |
| LINC02593  | 0.63 | 3.22847E-19 | RNU6-448P  | 0.45 | 1.53366E-09 |
| LINC02689  | 0.63 | 3.41208E-19 | GPR37      | 0.45 | 1.55349E-09 |
| SYPL2      | 0.62 | 5.12671E-19 | MTATP6P8   | 0.45 | 1.5821E-09  |
| AC126915.2 | 0.62 | 6.41854E-19 | DSCR4-IT1  | 0.45 | 1.59162E-09 |
| DNM3-IT1   | 0.62 | 7.56165E-19 | AL138831.3 | 0.45 | 1.60407E-09 |
| AL356390.1 | 0.62 | 8.10325E-19 | AC091770.1 | 0.45 | 1.73073E-09 |
| AL671883.1 | 0.62 | 8.4983E-19  | AL359697.1 | 0.45 | 1.78138E-09 |
| OR8A1      | 0.62 | 9.24851E-19 | AC017100.1 | 0.45 | 1.81832E-09 |
| AC013287.1 | 0.62 | 9.56596E-19 | TAS2R14    | 0.45 | 1.90431E-09 |
| CTCFL      | 0.62 | 9.68994E-19 | LINC00442  | 0.45 | 1.91324E-09 |
| GUSBP12    | 0.62 | 1.1817E-18  | AC023347.1 | 0.45 | 1.96533E-09 |
| LDHAL6A    | 0.62 | 1.27727E-18 | C10orf88B  | 0.45 | 2.05841E-09 |
| AL353726.1 | 0.62 | 1.29389E-18 | MRPS17P1   | 0.45 | 2.23227E-09 |
| TSBP1-AS1  | 0.62 | 1.5853E-18  | LINC01581  | 0.45 | 2.28609E-09 |
| AC016885.3 | 0.62 | 1.69284E-18 | RPS6P8     | 0.45 | 2.2932E-09  |
| NF1P4      | 0.62 | 1.74718E-18 | AC010547.5 | 0.45 | 2.32182E-09 |
| OSTCP2     | 0.62 | 2.08955E-18 | MTND5P6    | 0.45 | 2.37814E-09 |
| AACSP1     | 0.62 | 2.11729E-18 | AC140113.4 | 0.45 | 2.40361E-09 |
| PANX3      | 0.62 | 2.26354E-18 | PRAME      | 0.45 | 2.45556E-09 |
| KCNV1      | 0.62 | 2.32944E-18 | AL662795.2 | 0.45 | 2.45741E-09 |

|             |      |             |            |      |             |
|-------------|------|-------------|------------|------|-------------|
| AL022329.3  | 0.61 | 3.48548E-18 | ZNF608     | 0.45 | 2.49344E-09 |
| AC107464.2  | 0.61 | 4.31333E-18 | AP001476.1 | 0.45 | 2.65585E-09 |
| CFAP77      | 0.61 | 4.31582E-18 | TP53TG3D   | 0.44 | 2.74595E-09 |
| AC079987.1  | 0.61 | 4.77561E-18 | RPEP4      | 0.44 | 2.82738E-09 |
| AC140125.1  | 0.61 | 4.92962E-18 | HERC2P5    | 0.44 | 2.83006E-09 |
| AC096543.2  | 0.61 | 5.36473E-18 | DSCR4      | 0.44 | 2.87294E-09 |
| AL160254.1  | 0.61 | 5.93896E-18 | GRAMD1C    | 0.44 | 2.95799E-09 |
| AC055788.2  | 0.61 | 6.88314E-18 | AC007240.2 | 0.44 | 3.04806E-09 |
| LUNAR1      | 0.61 | 7.15355E-18 | AL355297.3 | 0.44 | 3.20734E-09 |
| ERBB4       | 0.61 | 8.30064E-18 | AC002091.1 | 0.44 | 3.40853E-09 |
| LINC01140   | 0.61 | 8.51123E-18 | HES7       | 0.44 | 3.42575E-09 |
| AP000428.2  | 0.61 | 8.80707E-18 | PNMA3      | 0.44 | 3.7477E-09  |
| AL713851.1  | 0.61 | 9.72471E-18 | CR392039.3 | 0.44 | 3.76847E-09 |
| H2BU1       | 0.60 | 1.28402E-17 | FBXO16     | 0.44 | 3.84836E-09 |
| AC015574.1  | 0.60 | 1.4688E-17  | MTND4P4    | 0.44 | 3.93892E-09 |
| RN7SL221P   | 0.60 | 1.55303E-17 | CR381653.2 | 0.44 | 3.9403E-09  |
| TTC39C-AS1  | 0.60 | 1.93427E-17 | AC027097.1 | 0.44 | 4.15995E-09 |
| OR8B7P      | 0.60 | 2.03436E-17 | ANKRD34A   | 0.44 | 4.29401E-09 |
| CRYZ        | 0.60 | 2.07421E-17 | AC010336.2 | 0.44 | 4.43498E-09 |
| SNORD114-25 | 0.60 | 2.1364E-17  | UFL1       | 0.44 | 4.6043E-09  |
| LINC01621   | 0.60 | 2.17901E-17 | AC245452.3 | 0.44 | 4.71441E-09 |
| H4C5        | 0.60 | 3.50327E-17 | AC010240.1 | 0.44 | 5.22516E-09 |
| LINC01625   | 0.60 | 4.09763E-17 | PABPC1L    | 0.44 | 5.50081E-09 |
| AC010336.5  | 0.60 | 4.40215E-17 | COL26A1    | 0.44 | 5.57359E-09 |
| MIR663AHG   | 0.60 | 5.22915E-17 | ANKRD26P1  | 0.44 | 5.76377E-09 |
| AL451064.2  | 0.60 | 5.36826E-17 | LINC00540  | 0.44 | 5.90415E-09 |
| AC009802.1  | 0.60 | 5.44089E-17 | AC233702.9 | 0.44 | 5.97425E-09 |
| AL160391.1  | 0.59 | 5.52861E-17 | WASF5P     | 0.44 | 6.0534E-09  |
| CADM2       | 0.59 | 5.54083E-17 | CAPS2      | 0.44 | 6.31101E-09 |
| BX664608.1  | 0.59 | 7.30647E-17 | OR8G3P     | 0.43 | 6.85043E-09 |
| AC051618.1  | 0.59 | 8.37283E-17 | DUSP19     | 0.43 | 7.4985E-09  |
| MAPT-IT1    | 0.59 | 8.83745E-17 | AC107068.1 | 0.43 | 8.33869E-09 |
| LINC00535   | 0.59 | 9.44081E-17 | ZSCAN1     | 0.43 | 8.5435E-09  |
| AC104667.1  | 0.59 | 1.02598E-16 | AL137157.1 | 0.43 | 8.60476E-09 |
| AL022324.3  | 0.59 | 1.09061E-16 | RNU6-925P  | 0.43 | 8.65048E-09 |
| AC090578.2  | 0.59 | 1.23751E-16 | ADGRL2     | 0.43 | 8.66317E-09 |
| OR8Q1P      | 0.59 | 1.31281E-16 | AL138831.2 | 0.43 | 8.99399E-09 |
| PPP3R2      | 0.59 | 1.42453E-16 | DEFB109D   | 0.43 | 9.29277E-09 |
| KCNQ2       | 0.59 | 2.14971E-16 | OR8B10P    | 0.43 | 9.73241E-09 |
| RNU6-909P   | 0.59 | 2.20157E-16 | LINC02090  | 0.43 | 1.00915E-08 |
| SYCE1       | 0.59 | 2.25434E-16 | CTXN1      | 0.43 | 1.05418E-08 |
| AP000553.4  | 0.59 | 2.31281E-16 | AL645940.1 | 0.43 | 1.06224E-08 |



|            |      |             |             |      |             |
|------------|------|-------------|-------------|------|-------------|
| EDIL3-DT   | 0.58 | 2.44837E-16 | PKHD1       | 0.43 | 1.07199E-08 |
| UBR5-AS1   | 0.58 | 2.47022E-16 | AC138649.1  | 0.43 | 1.10613E-08 |
| MEIOC      | 0.58 | 2.6501E-16  | XAGE1A      | 0.43 | 1.15682E-08 |
| AC019193.3 | 0.58 | 3.025E-16   | LINC02505   | 0.43 | 1.15813E-08 |
| AL929601.1 | 0.58 | 3.92156E-16 | B4GALT6     | 0.43 | 1.16905E-08 |
| AP000553.2 | 0.58 | 4.4181E-16  | ANKRD20A21P | 0.43 | 1.20262E-08 |
| THSD7A     | 0.58 | 4.81233E-16 | LINC02521   | 0.43 | 1.24143E-08 |
| AP000350.8 | 0.58 | 4.81508E-16 | MED15P6     | 0.43 | 1.26741E-08 |
| AC010735.2 | 0.58 | 5.12559E-16 | HCG18       | 0.43 | 1.3173E-08  |
| SLC11A2    | 0.58 | 5.40885E-16 | USP32P3     | 0.43 | 1.33123E-08 |
| AL365259.1 | 0.58 | 5.88564E-16 | AC018865.2  | 0.43 | 1.33578E-08 |
| AC096736.3 | 0.58 | 7.11646E-16 | PRSS43P     | 0.43 | 1.33675E-08 |
| LINC01600  | 0.58 | 7.30846E-16 | LINC01839   | 0.43 | 1.37761E-08 |
| TATDN2P3   | 0.58 | 7.86472E-16 | AL135791.1  | 0.43 | 1.3866E-08  |
| L29074.1   | 0.58 | 9.33909E-16 | H2BC15      | 0.43 | 1.45916E-08 |
| CDH10      | 0.57 | 1.113E-15   | AC237221.2  | 0.42 | 1.58085E-08 |
| GABRG2     | 0.57 | 1.11353E-15 | AC090061.1  | 0.42 | 1.59591E-08 |
| CCDC151    | 0.57 | 1.17085E-15 | AC097462.3  | 0.42 | 1.63645E-08 |
| AC009126.1 | 0.57 | 1.23389E-15 | AL133334.1  | 0.42 | 1.64585E-08 |
| LINC01448  | 0.57 | 1.35066E-15 | AC068134.1  | 0.42 | 1.65393E-08 |
| AC069113.1 | 0.57 | 1.73219E-15 | PSLNR       | 0.42 | 1.72569E-08 |
| SNX18P24   | 0.57 | 2.08534E-15 | AC138776.1  | 0.42 | 1.73784E-08 |
| AP000553.6 | 0.57 | 2.6064E-15  | KIF5A       | 0.42 | 1.74068E-08 |
| AC073389.3 | 0.57 | 2.66823E-15 | PLPPR3      | 0.42 | 1.76833E-08 |
| AC097532.3 | 0.57 | 2.8895E-15  | RASGEF1C    | 0.42 | 1.85272E-08 |
| SELENOV    | 0.57 | 2.95553E-15 | AL590064.1  | 0.42 | 2.02872E-08 |
| PROKR2     | 0.57 | 3.10912E-15 | AL353729.2  | 0.42 | 2.17491E-08 |
| SGCG       | 0.57 | 3.13223E-15 | PPIAP35     | 0.42 | 2.20791E-08 |
| MRGPRX12P  | 0.57 | 3.36711E-15 | GSG1L       | 0.42 | 2.21921E-08 |
| AC119751.4 | 0.57 | 3.58375E-15 | FAM216A     | 0.42 | 2.24118E-08 |
| NEFMP1     | 0.57 | 3.89184E-15 | AC119751.3  | 0.42 | 2.30169E-08 |
| MTCO2P10   | 0.56 | 4.15791E-15 | PRSS44P     | 0.42 | 2.32075E-08 |
| AL353743.2 | 0.56 | 4.58526E-15 | LINC01901   | 0.42 | 2.38756E-08 |
| SEMA3A     | 0.56 | 5.11304E-15 | TSPEAR-AS1  | 0.42 | 2.4026E-08  |
| H2AC7      | 0.56 | 6.28076E-15 | NF1P8       | 0.42 | 2.42358E-08 |
| FGF12-AS3  | 0.56 | 6.49267E-15 | AC136431.1  | 0.42 | 2.47731E-08 |
| MAGEA4-AS1 | 0.56 | 6.68416E-15 | H2AW        | 0.42 | 2.55361E-08 |
| MYO18B     | 0.56 | 7.1625E-15  | FIGNL2-DT   | 0.42 | 2.63178E-08 |
| AL645608.6 | 0.56 | 7.70292E-15 | RB1-DT      | 0.42 | 2.65553E-08 |
| OR6L1P     | 0.56 | 8.04754E-15 | AL355490.2  | 0.42 | 2.66158E-08 |
| RPA2P1     | 0.56 | 8.32102E-15 | AC024361.2  | 0.42 | 2.6674E-08  |
| OR8B12     | 0.56 | 8.57164E-15 | WDR17       | 0.42 | 2.70563E-08 |

|            |      |             |                 |      |             |
|------------|------|-------------|-----------------|------|-------------|
| AC110813.1 | 0.56 | 8.9811E-15  | NLGN1-AS1       | 0.42 | 2.72869E-08 |
| MAGEA8-AS1 | 0.56 | 9.0834E-15  | LL22NC03-63E9.3 | 0.42 | 2.72893E-08 |
| ZNF280A    | 0.56 | 9.69015E-15 | DNAJC27-AS1     | 0.42 | 2.75494E-08 |
| NR5A2      | 0.56 | 9.7175E-15  | AC011498.4      | 0.42 | 2.77681E-08 |
| AC140168.1 | 0.56 | 1.30013E-14 | HNRNPDL4        | 0.42 | 2.83126E-08 |
| AC093326.1 | 0.56 | 1.37936E-14 | AL132765.2      | 0.42 | 2.87746E-08 |
| AL589823.1 | 0.55 | 1.50091E-14 | METTL7A         | 0.42 | 2.88973E-08 |
| P2RX2      | 0.55 | 1.52734E-14 | IGHV7-40        | 0.42 | 2.90721E-08 |
| GTSF1      | 0.55 | 1.6376E-14  | AC105118.1      | 0.42 | 2.93486E-08 |
| MTND4LP32  | 0.55 | 2.34457E-14 | C10orf88        | 0.42 | 3.09E-08    |
| KCNH5      | 0.55 | 2.35474E-14 | RAD21L1         | 0.42 | 3.12935E-08 |
| AC010735.1 | 0.55 | 2.63034E-14 | H2AB3           | 0.42 | 3.14185E-08 |
| AP001425.1 | 0.55 | 2.79166E-14 | AL137003.1      | 0.42 | 3.36572E-08 |
| RPS3AP24   | 0.55 | 3.26254E-14 | AL138828.1      | 0.42 | 3.38533E-08 |
| OXTR       | 0.55 | 3.71072E-14 | AL008721.1      | 0.42 | 3.42204E-08 |
| LINC01351  | 0.55 | 4.5368E-14  | F11-AS1         | 0.42 | 3.44244E-08 |
| TYW3       | 0.55 | 4.83664E-14 | PDGFC           | 0.41 | 3.78972E-08 |
| USP24P1    | 0.55 | 4.93703E-14 | LBHD1           | 0.41 | 3.84795E-08 |
| MTCYBP5    | 0.55 | 5.0682E-14  | RNA5SP532       | 0.41 | 3.8892E-08  |
| LCA5       | 0.55 | 5.06914E-14 | EDIL3           | 0.41 | 4.01429E-08 |
| AP000916.1 | 0.55 | 5.25834E-14 | AC105339.5      | 0.41 | 4.39217E-08 |
| AP000553.1 | 0.55 | 5.29325E-14 | RN7SKP234       | 0.41 | 4.51628E-08 |
| POLI       | 0.54 | 5.43972E-14 | MTCYBP29        | 0.41 | 4.53015E-08 |
| Z95115.1   | 0.54 | 5.59383E-14 | AC010632.3      | 0.41 | 4.65478E-08 |
| AC092967.1 | 0.54 | 6.03972E-14 | ACOT6           | 0.41 | 4.89543E-08 |
| OR8D2      | 0.54 | 6.38195E-14 | SS18L1          | 0.41 | 4.91094E-08 |
| OR8B6P     | 0.54 | 6.46818E-14 | RGL3            | 0.41 | 5.11228E-08 |
| FRG1GP     | 0.54 | 8.62479E-14 | AC233702.1      | 0.41 | 5.33357E-08 |
| ZNF663P    | 0.54 | 9.7037E-14  | AP000705.2      | 0.41 | 5.33411E-08 |
| OR8A3P     | 0.54 | 1.05007E-13 | AL157414.4      | 0.41 | 5.45139E-08 |
| AL031686.1 | 0.54 | 1.08209E-13 | KAT14           | 0.41 | 5.49505E-08 |
| PCDH10     | 0.54 | 1.0889E-13  | AL034550.3      | 0.41 | 5.69663E-08 |
| LINC00308  | 0.54 | 1.11468E-13 | FRG1FP          | 0.41 | 5.86582E-08 |
| NAT8L      | 0.54 | 1.12708E-13 | SLC2A3          | 0.41 | 5.89207E-08 |
| KCNN1      | 0.54 | 1.13298E-13 | HESX1           | 0.41 | 5.97134E-08 |
| AC011029.1 | 0.54 | 1.50923E-13 | IGLVIVOR22-1    | 0.41 | 6.17415E-08 |
| AC087499.2 | 0.54 | 1.53139E-13 | MIR3153         | 0.41 | 6.22725E-08 |
| AC092656.1 | 0.54 | 1.53667E-13 | AC138625.1      | 0.41 | 6.40278E-08 |
| FRG2DP     | 0.54 | 1.66986E-13 | AC078916.1      | 0.41 | 6.55089E-08 |
| AL662791.1 | 0.54 | 1.76932E-13 | AL132655.2      | 0.41 | 6.59612E-08 |
| AC119751.1 | 0.54 | 1.77803E-13 | LINC00466       | 0.41 | 6.74568E-08 |
| GBX1       | 0.53 | 2.10204E-13 | SAPCD2P4        | 0.41 | 6.96613E-08 |

|            |      |             |              |      |             |
|------------|------|-------------|--------------|------|-------------|
| AC096555.1 | 0.53 | 2.11407E-13 | HCG15        | 0.41 | 7.03774E-08 |
| SERPINH1P1 | 0.53 | 2.15603E-13 | AC027117.1   | 0.41 | 7.06623E-08 |
| AC012409.2 | 0.53 | 2.1917E-13  | ASNSP1       | 0.41 | 7.18749E-08 |
| AL137802.2 | 0.53 | 2.32558E-13 | ANKRD53      | 0.41 | 7.19604E-08 |
| KCNC3      | 0.53 | 2.32669E-13 | RN7SKP169    | 0.41 | 7.24751E-08 |
| POM121L2   | 0.53 | 2.34418E-13 | CATSPER2P1   | 0.41 | 7.27963E-08 |
| AL645608.2 | 0.53 | 2.7307E-13  | AP001626.1   | 0.41 | 7.4297E-08  |
| DPPA2      | 0.53 | 3.14551E-13 | RN7SL268P    | 0.41 | 7.43772E-08 |
| AL450332.1 | 0.53 | 4.19791E-13 | AL391152.1   | 0.41 | 7.45483E-08 |
| THRAP3P3   | 0.53 | 4.40401E-13 | H2BC9        | 0.41 | 7.5235E-08  |
| CCM2L      | 0.53 | 4.5428E-13  | AL031777.2   | 0.41 | 7.53967E-08 |
| AC099754.1 | 0.53 | 4.8033E-13  | SLC27A6      | 0.41 | 7.81484E-08 |
| SPATA31C2  | 0.53 | 5.43119E-13 | AC136944.3   | 0.41 | 8.01862E-08 |
| AL353726.2 | 0.53 | 5.62372E-13 | MST1         | 0.41 | 8.0418E-08  |
| AL353740.1 | 0.53 | 5.98078E-13 | AL513478.4   | 0.41 | 8.11344E-08 |
| H3C5P      | 0.52 | 6.84989E-13 | AL451142.1   | 0.40 | 8.28564E-08 |
| CNTNAP3P1  | 0.52 | 7.05627E-13 | ATP6V0E2-AS1 | 0.40 | 8.46946E-08 |
| AC004925.1 | 0.52 | 7.87799E-13 | CHRNE        | 0.40 | 8.88013E-08 |
| AC093875.1 | 0.52 | 7.93676E-13 | CDC37P2      | 0.40 | 8.89273E-08 |
| PAGE5      | 0.52 | 8.08587E-13 | ZNF780A      | 0.40 | 9.05499E-08 |
| AL353572.3 | 0.52 | 8.88137E-13 | BAIAP3       | 0.40 | 9.26405E-08 |
| TNNI3      | 0.52 | 1.03724E-12 | LINC01237    | 0.40 | 9.2714E-08  |
| CLDN6      | 0.52 | 1.06228E-12 | AC023824.6   | 0.40 | 9.28787E-08 |
| COX6A2     | 0.52 | 1.12853E-12 | EXTL2        | 0.40 | 9.59386E-08 |
| PHF2P2     | 0.52 | 1.19633E-12 | AC138207.3   | 0.40 | 9.73464E-08 |
| GRAMD4P2   | 0.52 | 1.40801E-12 | NEK2P1       | 0.40 | 1.00239E-07 |
| CEACAMP10  | 0.52 | 1.68646E-12 | LINC01202    | 0.40 | 1.00652E-07 |
| SLITRK6    | 0.52 | 1.68919E-12 | PCMTD2       | 0.40 | 1.03135E-07 |
| AL591438.2 | 0.52 | 1.72274E-12 | TMEM247      | 0.40 | 1.04219E-07 |
| MTND2P6    | 0.52 | 1.77646E-12 | AC023141.13  | 0.40 | 1.0432E-07  |
| CLUL1      | 0.52 | 1.98682E-12 | AC009005.1   | 0.40 | 1.06822E-07 |
| AC099654.4 | 0.51 | 2.04448E-12 | AL590096.1   | 0.40 | 1.07701E-07 |
| CFHR4      | 0.51 | 2.05823E-12 | AC105129.2   | 0.40 | 1.08919E-07 |
| AP006261.1 | 0.51 | 2.06494E-12 | CDRT15P8     | 0.40 | 1.09781E-07 |
| VN1R34P    | 0.51 | 2.08136E-12 | AC097532.2   | 0.40 | 1.1098E-07  |
| MYOZ3      | 0.51 | 2.15975E-12 | RALY-AS1     | 0.40 | 1.11449E-07 |
| AL138885.2 | 0.51 | 2.23064E-12 | RNU6-677P    | 0.40 | 1.12152E-07 |
| FAR2P1     | 0.51 | 2.26887E-12 | AC087393.1   | 0.40 | 1.12434E-07 |
| AC087499.5 | 0.51 | 2.35386E-12 | SLC22A31     | 0.40 | 1.14458E-07 |
| LINC02600  | 0.51 | 2.37488E-12 | TUBA3C       | 0.40 | 1.16921E-07 |
| NF1P7      | 0.51 | 2.65679E-12 | AP002761.3   | 0.40 | 1.17989E-07 |
| MAP3K15    | 0.51 | 2.66823E-12 | PRR36        | 0.40 | 1.18733E-07 |

---

|            |      |             |               |      |             |
|------------|------|-------------|---------------|------|-------------|
| RARRES2P10 | 0.51 | 2.8434E-12  | POTEG         | 0.40 | 1.19686E-07 |
| AC008738.1 | 0.51 | 2.91639E-12 | C2orf15       | 0.40 | 1.20435E-07 |
| SPATA31C1  | 0.51 | 3.02202E-12 | EFNA5         | 0.40 | 1.21861E-07 |
| AL009179.2 | 0.51 | 3.37603E-12 | AC083843.1    | 0.40 | 1.25414E-07 |
| SPATA31E1  | 0.51 | 3.50251E-12 | H2BC8         | 0.40 | 1.25615E-07 |
| ZNF391     | 0.51 | 3.92095E-12 | AC112229.2    | 0.40 | 1.30556E-07 |
| FXVD7      | 0.51 | 4.10528E-12 | CCDC144NL-AS1 | 0.40 | 1.32491E-07 |
| GRB14      | 0.51 | 4.22088E-12 | CFAP61-AS1    | 0.40 | 1.34888E-07 |
| FAR2P4     | 0.51 | 4.75636E-12 | PACRG         | 0.40 | 1.36811E-07 |
| AC007663.3 | 0.51 | 4.79377E-12 | XAGE1B        | 0.40 | 1.38651E-07 |
| STAG3      | 0.51 | 5.10101E-12 | AC022387.2    | 0.40 | 1.39631E-07 |
| AP001804.1 | 0.51 | 5.23803E-12 | H2BC19P       | 0.40 | 1.46942E-07 |
| NR2F2-AS1  | 0.51 | 5.58923E-12 | KLHL7-DT      | 0.40 | 1.58765E-07 |
| LINC00314  | 0.51 | 5.77569E-12 | AC020934.1    | 0.40 | 1.67956E-07 |
| SMC2-AS1   | 0.51 | 6.11304E-12 | NRBF2P2       | 0.40 | 1.70323E-07 |
|            |      |             | AC007391.1    | 0.40 | 1.74439E-07 |

---

**Table S4.** Genes significantly correlated with LINC01087 expression in ovarian cancer (TCGA).

| Gene symbol | Positive<br>R value | P-value     | Gene symbol  | Positive<br>R value | P-value     |
|-------------|---------------------|-------------|--------------|---------------------|-------------|
| AC093838.1  | 0.91                | 2.5519E-149 | AC009597.1   | 0.48                | 1.54889E-23 |
| MED15P4     | 0.81                | 3.30589E-91 | RN7SL863P    | 0.48                | 1.58438E-23 |
| AC006512.2  | 0.68                | 1.55423E-52 | TTC4P1       | 0.48                | 1.81225E-23 |
| ATP6V1G1P7  | 0.67                | 8.25797E-52 | AP000619.1   | 0.48                | 2.00541E-23 |
| LINC00529   | 0.67                | 8.25797E-52 | ANKRD63      | 0.48                | 2.93902E-23 |
| RNU6-295P   | 0.67                | 8.25797E-52 | FER1L6       | 0.48                | 3.4718E-23  |
| AP002991.2  | 0.67                | 8.25797E-52 | PNMA5        | 0.47                | 2.36614E-22 |
| SIGLECL1    | 0.67                | 1.39398E-51 | LINC01854    | 0.47                | 4.61838E-22 |
| AC007846.1  | 0.67                | 1.77284E-51 | MIR4255      | 0.47                | 6.15206E-22 |
| RPL6P12     | 0.67                | 1.41786E-50 | POTEE        | 0.46                | 2.66032E-21 |
| AP003031.1  | 0.67                | 3.7339E-50  | HOXC-AS3     | 0.46                | 2.9141E-21  |
| AC004835.1  | 0.67                | 4.87028E-50 | C10orf71-AS1 | 0.45                | 8.55858E-21 |
| MYL12BP1    | 0.66                | 9.41662E-49 | SLC25A24P2   | 0.45                | 1.08936E-20 |
| LINC01682   | 0.65                | 1.53134E-47 | LHFPL3-AS2   | 0.45                | 1.22293E-20 |
| DHRS2       | 0.65                | 2.73486E-47 | LINC01686    | 0.45                | 1.5483E-20  |
| AC007846.2  | 0.64                | 3.31409E-45 | FAM83C       | 0.45                | 1.98928E-20 |
| LINC02706   | 0.64                | 7.13851E-45 | KRT18P59     | 0.45                | 2.31439E-20 |
| AL592464.3  | 0.64                | 1.75464E-44 | SNX18P7      | 0.45                | 4.4976E-20  |
| AFG3L2P1    | 0.63                | 6.74738E-44 | AP002008.1   | 0.45                | 4.6822E-20  |
| AL117340.1  | 0.63                | 6.82527E-44 | AC090735.1   | 0.45                | 5.04702E-20 |
| AL592464.1  | 0.62                | 5.5581E-42  | Z98259.2     | 0.45                | 5.32037E-20 |
| KRT72       | 0.62                | 3.27579E-41 | GPR83        | 0.44                | 6.98501E-20 |
| POTEKP      | 0.61                | 7.88627E-41 | AC091133.4   | 0.44                | 7.81771E-20 |
| HOXC12      | 0.61                | 1.3117E-40  | AC108727.2   | 0.44                | 8.76905E-20 |
| AC111188.2  | 0.61                | 6.41932E-40 | UPK2         | 0.44                | 1.45276E-19 |
| AC021006.1  | 0.59                | 1.97816E-37 | KBTBD13      | 0.44                | 1.65193E-19 |
| PIP5K1P2    | 0.59                | 1.46754E-36 | FNTA         | 0.44                | 2.05141E-19 |
| AC000036.1  | 0.59                | 1.82759E-36 | AC012531.6   | 0.44                | 2.1494E-19  |
| LINC01120   | 0.58                | 2.31104E-35 | OR7E101P     | 0.44                | 2.69909E-19 |
| C15orf62    | 0.58                | 2.73046E-35 | VIPR2        | 0.44                | 3.25409E-19 |
| AL606500.1  | 0.58                | 4.02016E-35 | AC016168.2   | 0.44                | 3.94727E-19 |
| TERB1       | 0.58                | 5.99555E-35 | RN7SKP200    | 0.44                | 4.90634E-19 |
| C9orf129    | 0.57                | 8.59279E-35 | TMPOP2       | 0.43                | 5.55929E-19 |
| TBC1D8-AS1  | 0.57                | 4.70651E-34 | GPS2P2       | 0.43                | 7.04072E-19 |
| AC007993.1  | 0.57                | 8.04766E-34 | AC091133.5   | 0.43                | 7.11252E-19 |
| AL513478.2  | 0.56                | 1.44061E-32 | AC124947.2   | 0.43                | 9.33711E-19 |
| POMK        | 0.56                | 1.61221E-32 | AP000692.2   | 0.43                | 1.03565E-18 |
| ARMS2       | 0.55                | 2.20195E-31 | SSBP3P2      | 0.43                | 1.03606E-18 |

---

|            |      |             |            |      |             |
|------------|------|-------------|------------|------|-------------|
| LINC01623  | 0.54 | 2.2104E-30  | LINC01647  | 0.43 | 1.1827E-18  |
| AL109809.2 | 0.54 | 6.2863E-30  | ISCA1P4    | 0.43 | 1.4958E-18  |
| AC016168.1 | 0.54 | 1.24898E-29 | AL590068.2 | 0.43 | 1.75655E-18 |
| LINC01499  | 0.53 | 1.38783E-29 | RPL4P1     | 0.43 | 1.76205E-18 |
| AC009477.1 | 0.53 | 5.27622E-29 | TEX14      | 0.43 | 3.04114E-18 |
| BRDT       | 0.53 | 1.15564E-28 | AC012531.4 | 0.43 | 3.07058E-18 |
| AC112243.1 | 0.52 | 3.88188E-28 | KRT9       | 0.42 | 3.98712E-18 |
| TRAV8-2    | 0.52 | 7.65978E-28 | OR7E96P    | 0.42 | 5.46461E-18 |
| MIR196A2   | 0.52 | 2.28855E-27 | AL139384.2 | 0.42 | 6.97202E-18 |
| LINC01475  | 0.52 | 3.17157E-27 | HOOK3      | 0.42 | 7.83489E-18 |
| CALCA      | 0.51 | 4.10743E-27 | AC006460.1 | 0.42 | 7.91889E-18 |
| AL138686.2 | 0.51 | 5.87869E-27 | HYLS1      | 0.42 | 9.40279E-18 |
| AC005342.2 | 0.51 | 9.59796E-27 | CYP4F26P   | 0.42 | 9.8183E-18  |
| TREML5P    | 0.51 | 1.6414E-26  | YAP1       | 0.42 | 1.13877E-17 |
| AC079414.2 | 0.51 | 1.73003E-26 | MRPS21P5   | 0.42 | 1.20205E-17 |
| SCP2D1-AS1 | 0.51 | 2.19581E-26 | NRXN2-AS1  | 0.42 | 1.81972E-17 |
| TEX55      | 0.51 | 2.6328E-26  | AL391883.1 | 0.42 | 2.2848E-17  |
| AC091179.1 | 0.51 | 4.32454E-26 | PRAMEF19   | 0.42 | 2.49784E-17 |
| PATE2      | 0.50 | 7.06663E-26 | RNU7-187P  | 0.41 | 2.93072E-17 |
| HOXC11     | 0.50 | 9.45616E-26 | AC002115.1 | 0.41 | 3.07548E-17 |
| AC111149.2 | 0.50 | 1.00934E-25 | MIR138-2   | 0.41 | 8.98595E-17 |
| AC064869.1 | 0.50 | 2.12053E-25 | SPATA31E1  | 0.41 | 9.37168E-17 |
| RNU7-159P  | 0.50 | 3.46128E-25 | PDSS1P2    | 0.41 | 1.11644E-16 |
| Z94160.1   | 0.50 | 4.53726E-25 | AC073869.6 | 0.41 | 1.22834E-16 |
| AP001042.3 | 0.50 | 5.19444E-25 | GJA8       | 0.40 | 3.38565E-16 |
| CLCN1      | 0.49 | 1.36212E-24 | RGS8       | 0.40 | 3.8684E-16  |
| AL391358.1 | 0.49 | 1.37433E-24 | NF1P8      | 0.40 | 3.97383E-16 |
| AC021006.2 | 0.49 | 1.56962E-24 | HOTAIR     | 0.40 | 4.53704E-16 |
| AC008443.5 | 0.49 | 2.49791E-24 | AC106793.1 | 0.40 | 4.57198E-16 |
| NUTM1      | 0.49 | 5.17771E-24 | RNU6-781P  | 0.40 | 6.46058E-16 |
| AC004147.4 | 0.49 | 6.62166E-24 | AP001486.3 | 0.40 | 9.43728E-16 |
| AC087632.1 | 0.48 | 8.75141E-24 | SMOC1      | 0.40 | 9.94388E-16 |
|            |      |             | MEIOC      | 0.40 | 1.09602E-15 |

---

**Table S5.** Genes significantly correlated with LINC01087 expression in stomach adenocarcinoma (TCGA).

| Gene symbol | Positive<br>R value | P-value     | Gene symbol | Positive<br>R value | P-value     |
|-------------|---------------------|-------------|-------------|---------------------|-------------|
| POTEKP      | 0.93                | 5.2227E-160 | AL590560.3  | 0.47                | 2.78897E-22 |
| AC093838.1  | 0.90                | 2.7416E-137 | F7          | 0.47                | 2.87164E-22 |
| MED15P4     | 0.84                | 1.1074E-101 | AL136038.3  | 0.47                | 3.00737E-22 |
| AL022329.3  | 0.80                | 4.92878E-85 | AC091153.3  | 0.47                | 3.17414E-22 |
| NF1P8       | 0.79                | 9.29058E-80 | CCDC8       | 0.47                | 3.18856E-22 |
| AP005205.3  | 0.76                | 1.19219E-70 | LINC01518   | 0.47                | 3.2261E-22  |
| AC018865.2  | 0.75                | 1.41379E-69 | AL049543.1  | 0.47                | 3.81352E-22 |
| AC090907.2  | 0.75                | 2.66094E-69 | AC012467.1  | 0.47                | 4.60134E-22 |
| AC135068.11 | 0.75                | 1.00826E-68 | PDE6B       | 0.47                | 5.14239E-22 |
| AC183088.4  | 0.75                | 2.08581E-68 | LINC01012   | 0.47                | 5.44214E-22 |
| LINC01580   | 0.74                | 1.68429E-67 | AC243965.2  | 0.47                | 5.89769E-22 |
| FAR2P1      | 0.74                | 1.67667E-66 | AL109918.1  | 0.47                | 6.43541E-22 |
| NF1P9       | 0.74                | 8.06921E-66 | FO082796.1  | 0.47                | 6.55031E-22 |
| SOCS2P2     | 0.74                | 2.845E-65   | AC099661.1  | 0.47                | 6.72162E-22 |
| LINC02203   | 0.73                | 5.63804E-64 | AC093635.1  | 0.47                | 7.17868E-22 |
| AL353726.2  | 0.72                | 7.75175E-62 | RNU6-53P    | 0.47                | 7.33577E-22 |
| KLF2P4      | 0.72                | 1.66255E-61 | AF186192.2  | 0.47                | 7.44838E-22 |
| AL451142.1  | 0.72                | 5.07395E-61 | RN7SKP76    | 0.47                | 7.66024E-22 |
| AURKC       | 0.72                | 1.66353E-60 | IGHVII-46-1 | 0.47                | 9.5614E-22  |
| AC037471.1  | 0.72                | 1.89607E-60 | AL590062.1  | 0.47                | 1.00695E-21 |
| NF1P1       | 0.72                | 4.27314E-60 | AL353708.3  | 0.47                | 1.12836E-21 |
| AC134980.1  | 0.72                | 4.57659E-60 | LINC01740   | 0.47                | 1.12836E-21 |
| BMP6P1      | 0.71                | 8.38813E-60 | ANKRD26P3   | 0.47                | 1.15064E-21 |
| AC103996.3  | 0.71                | 2.84535E-58 | AL049646.1  | 0.47                | 1.3634E-21  |
| LINC01193   | 0.70                | 1.54308E-57 | AC244100.3  | 0.47                | 1.51406E-21 |
| AC131180.1  | 0.70                | 6.25024E-57 | LINC00355   | 0.46                | 1.78626E-21 |
| AC073578.4  | 0.70                | 6.6343E-57  | AC026471.5  | 0.46                | 1.83592E-21 |
| AC025884.2  | 0.70                | 3.65351E-56 | AL009176.1  | 0.46                | 1.87517E-21 |
| CENPIP1     | 0.70                | 1.30932E-55 | TSPEAR-AS2  | 0.46                | 2.03039E-21 |
| AL355516.1  | 0.69                | 4.38803E-55 | AL445228.2  | 0.46                | 2.16817E-21 |
| SPATA41     | 0.69                | 7.03258E-55 | AC091133.5  | 0.46                | 2.44208E-21 |
| FAR2P4      | 0.69                | 8.08585E-55 | AC092634.8  | 0.46                | 2.67843E-21 |
| AC090099.1  | 0.69                | 9.56322E-55 | TARS3       | 0.46                | 2.91424E-21 |
| AC037471.2  | 0.69                | 1.85534E-54 | AP003119.2  | 0.46                | 2.91479E-21 |
| AC245517.4  | 0.69                | 2.81637E-54 | AC016885.3  | 0.46                | 3.178E-21   |
| AL353726.1  | 0.69                | 1.29264E-53 | PIF1        | 0.46                | 3.44358E-21 |
| AC090164.1  | 0.68                | 6.48485E-53 | AC080080.1  | 0.46                | 3.56467E-21 |
| AC092326.1  | 0.68                | 3.33285E-52 | RAMP2-AS1   | 0.46                | 3.69215E-21 |

|            |      |             |            |      |             |
|------------|------|-------------|------------|------|-------------|
| MED15P9    | 0.68 | 4.8643E-52  | AL627309.7 | 0.46 | 3.8919E-21  |
| FO681548.1 | 0.68 | 6.76902E-52 | LINC01948  | 0.46 | 3.9701E-21  |
| CCDC144NL  | 0.68 | 1.03463E-51 | AC019254.1 | 0.46 | 4.49442E-21 |
| AC104041.1 | 0.68 | 1.14227E-51 | AC073488.1 | 0.46 | 4.75296E-21 |
| RNU6-1178P | 0.67 | 5.70787E-51 | AL133338.1 | 0.46 | 4.93486E-21 |
| AC015712.1 | 0.67 | 6.55394E-51 | SLCO6A1    | 0.46 | 4.99945E-21 |
| AC079460.2 | 0.67 | 1.69065E-50 | CASC6      | 0.46 | 5.27662E-21 |
| AC090774.2 | 0.67 | 2.08529E-50 | FGF14-AS2  | 0.46 | 5.71915E-21 |
| AC074389.2 | 0.67 | 6.6341E-50  | RNU6-695P  | 0.46 | 5.89616E-21 |
| KLF2P1     | 0.67 | 9.47562E-50 | AC136431.1 | 0.46 | 5.91963E-21 |
| OR4H6P     | 0.67 | 1.70377E-49 | SPTY2D1OS  | 0.46 | 6.30177E-21 |
| AC025884.1 | 0.67 | 2.9208E-49  | ZNF192P1   | 0.46 | 6.72237E-21 |
| AC025183.2 | 0.66 | 7.9419E-49  | DNAJC3-DT  | 0.46 | 6.88139E-21 |
| AC093326.1 | 0.66 | 9.69429E-49 | AL132780.5 | 0.46 | 7.03138E-21 |
| PHF2P2     | 0.66 | 1.8838E-48  | DSCR10     | 0.46 | 7.87144E-21 |
| AC245517.2 | 0.66 | 1.06475E-47 | AL118516.1 | 0.46 | 8.20111E-21 |
| LINC02348  | 0.65 | 3.70032E-47 | AL117379.1 | 0.46 | 9.72508E-21 |
| HOMER2P1   | 0.65 | 3.71309E-47 | CYP4F32P   | 0.46 | 1.03268E-20 |
| AL031674.1 | 0.65 | 4.47326E-47 | MAGEA10    | 0.46 | 1.05818E-20 |
| MTCO2P32   | 0.65 | 7.37471E-47 | LINC01311  | 0.46 | 1.17568E-20 |
| MED15P8    | 0.65 | 1.32015E-46 | LINC02393  | 0.46 | 1.1958E-20  |
| AC069148.1 | 0.65 | 1.43491E-46 | AC090164.3 | 0.46 | 1.22031E-20 |
| LINC01777  | 0.65 | 2.26646E-46 | RNU6-924P  | 0.46 | 1.30717E-20 |
| AC008805.1 | 0.65 | 4.32088E-46 | AC099654.5 | 0.46 | 1.45314E-20 |
| AL772337.3 | 0.65 | 4.89098E-46 | AC099487.2 | 0.45 | 1.48367E-20 |
| AC010491.1 | 0.65 | 7.92077E-46 | DUX4L35    | 0.45 | 1.50035E-20 |
| AC103996.2 | 0.65 | 1.15541E-45 | SNX18P14   | 0.45 | 1.64217E-20 |
| OR11J2P    | 0.65 | 1.29159E-45 | MAPK6-DT   | 0.45 | 1.66191E-20 |
| AC009477.1 | 0.64 | 1.95525E-45 | AL356585.4 | 0.45 | 1.68134E-20 |
| IGLVV-58   | 0.64 | 2.28731E-45 | LINC01850  | 0.45 | 1.84129E-20 |
| LINC01163  | 0.64 | 2.9662E-45  | AC069222.1 | 0.45 | 1.86789E-20 |
| Z98752.4   | 0.64 | 3.09149E-45 | AL513320.1 | 0.45 | 1.87353E-20 |
| LINC02253  | 0.64 | 4.12294E-45 | TP53TG3F   | 0.45 | 1.87641E-20 |
| AC103808.6 | 0.64 | 5.50594E-45 | ARHGEF19   | 0.45 | 1.95881E-20 |
| ADAM20P1   | 0.64 | 7.25696E-45 | AC005006.1 | 0.45 | 1.97348E-20 |
| FRG1DP     | 0.64 | 1.24455E-44 | AL158063.1 | 0.45 | 2.051E-20   |
| CCDC144NL- |      |             |            |      |             |
| AS1        | 0.64 | 1.50414E-44 | BNIP3P39   | 0.45 | 2.43763E-20 |
| NEK2P4     | 0.64 | 3.52757E-44 | AC138776.1 | 0.45 | 2.58816E-20 |
| IGLVI-56   | 0.64 | 3.75408E-44 | AC011632.1 | 0.45 | 2.63836E-20 |
| HERC2P8    | 0.64 | 5.10788E-44 | RNU6-1055P | 0.45 | 3.01198E-20 |
| LINC02076  | 0.64 | 9.91348E-44 | AC073464.1 | 0.45 | 3.39709E-20 |



|              |      |             |              |      |             |
|--------------|------|-------------|--------------|------|-------------|
| AL096701.4   | 0.63 | 1.62362E-43 | AC127520.1   | 0.45 | 3.67103E-20 |
| USP24P1      | 0.63 | 1.65558E-43 | CLCN3P1      | 0.45 | 4.09614E-20 |
| NF1P2        | 0.63 | 2.08908E-43 | AC063977.5   | 0.45 | 4.12957E-20 |
| OLIG3        | 0.63 | 6.97554E-43 | AL139005.1   | 0.45 | 4.14724E-20 |
| RNASEH1P1    | 0.63 | 2.47685E-42 | L3MBTL1      | 0.45 | 4.52255E-20 |
| FTCD         | 0.63 | 3.99191E-42 | AC140847.2   | 0.45 | 4.53827E-20 |
| AC026412.2   | 0.62 | 5.40879E-42 | AC231759.2   | 0.45 | 4.70031E-20 |
| IGHD5OR15-5B | 0.62 | 6.29669E-42 | AC026992.2   | 0.45 | 4.85438E-20 |
| OR4N3P       | 0.62 | 9.72311E-42 | LINC01893    | 0.45 | 5.12434E-20 |
| CR381670.1   | 0.62 | 1.14349E-41 | AP004782.1   | 0.45 | 5.60977E-20 |
| CXADRP2      | 0.62 | 5.78331E-41 | BX276092.7   | 0.45 | 5.99111E-20 |
| LINC00653    | 0.62 | 5.98582E-41 | AL512625.3   | 0.45 | 5.99234E-20 |
| GABRG2       | 0.62 | 6.87503E-41 | RNA5SP519    | 0.45 | 6.54878E-20 |
| IGHD2OR15-2A | 0.62 | 2.09497E-40 | Z82195.3     | 0.45 | 6.72934E-20 |
| TM2D3        | 0.61 | 4.00199E-40 | AC103794.1   | 0.45 | 6.87976E-20 |
| CT45A3       | 0.61 | 8.08943E-40 | ANKIB1       | 0.45 | 6.9512E-20  |
| AL050341.2   | 0.61 | 9.17728E-40 | AC073578.5   | 0.45 | 6.9553E-20  |
| AP000894.4   | 0.61 | 9.41291E-40 | AL021918.5   | 0.45 | 7.06282E-20 |
| ELK2BP       | 0.61 | 1.01135E-39 | MMEL1-AS1    | 0.45 | 7.43127E-20 |
| TP53TG3D     | 0.61 | 1.62361E-39 | MAGEA9B      | 0.45 | 7.70369E-20 |
| LRRD1        | 0.61 | 1.91209E-39 | AC068790.6   | 0.45 | 7.79034E-20 |
| MIR557       | 0.61 | 1.92265E-39 | AC007193.2   | 0.45 | 8.06969E-20 |
| LINC02254    | 0.61 | 2.64252E-39 | BX649601.1   | 0.45 | 8.24932E-20 |
| GRAMD4P8     | 0.61 | 2.93383E-39 | AC015818.5   | 0.45 | 8.49728E-20 |
| AC106052.1   | 0.60 | 8.40778E-39 | NFYAP1       | 0.45 | 9.04339E-20 |
| AC034231.1   | 0.60 | 8.48915E-39 | LINC00299    | 0.45 | 9.22782E-20 |
| AC016575.1   | 0.60 | 8.53396E-39 | SALL3        | 0.45 | 9.46666E-20 |
| TUFMP1       | 0.60 | 9.40827E-39 | MIR5582      | 0.45 | 9.89151E-20 |
| AC090696.1   | 0.60 | 1.32306E-38 | BMF          | 0.45 | 1.10113E-19 |
| AC002351.1   | 0.60 | 1.45424E-38 | C1GALT1C1L   | 0.45 | 1.16494E-19 |
| OR4M2        | 0.60 | 1.96785E-38 | AP000547.1   | 0.45 | 1.17917E-19 |
| AC106799.2   | 0.60 | 2.22032E-38 | GRM3-AS1     | 0.45 | 1.18624E-19 |
| NME8         | 0.60 | 2.24303E-38 | AC013727.3   | 0.45 | 1.20338E-19 |
| AC127381.1   | 0.60 | 2.29515E-38 | AL158835.2   | 0.44 | 1.39562E-19 |
| AC135068.1   | 0.60 | 3.10548E-38 | AC107926.1   | 0.44 | 1.42211E-19 |
| GTF2IP3      | 0.60 | 3.44794E-38 | CAMTA1-DT    | 0.44 | 1.46977E-19 |
| OR11H3P      | 0.60 | 3.63339E-38 | AC018697.1   | 0.44 | 1.53992E-19 |
| LINC01511    | 0.60 | 4.98347E-38 | AC020704.1   | 0.44 | 1.70808E-19 |
| Z95115.1     | 0.60 | 5.86466E-38 | AC019211.1   | 0.44 | 1.75083E-19 |
| AC073578.1   | 0.60 | 6.2983E-38  | OR56A5       | 0.44 | 1.81243E-19 |
| POTEE        | 0.60 | 1.40298E-37 | SLC25A21-AS1 | 0.44 | 1.96152E-19 |
| AC107057.1   | 0.60 | 1.8815E-37  | CYP51A1P2    | 0.44 | 2.05482E-19 |

|            |      |             |            |      |             |
|------------|------|-------------|------------|------|-------------|
| RASGEF1C   | 0.59 | 2.87793E-37 | CYP51A1P1  | 0.44 | 2.13403E-19 |
| MRPL45P1   | 0.59 | 3.89808E-37 | MGAT2P1    | 0.44 | 2.21221E-19 |
| AC103808.4 | 0.59 | 4.03048E-37 | LINC01843  | 0.44 | 2.24972E-19 |
| CEP83-DT   | 0.59 | 8.15674E-37 | AC020550.2 | 0.44 | 2.28485E-19 |
| RPS2P32    | 0.59 | 1.12486E-36 | AC044839.2 | 0.44 | 2.39425E-19 |
| AC106799.1 | 0.59 | 1.55866E-36 | AL606500.1 | 0.44 | 2.46683E-19 |
| HOXD-AS2   | 0.59 | 2.18369E-36 | AL355385.1 | 0.44 | 2.59864E-19 |
| LINC01524  | 0.59 | 2.58524E-36 | H2BW1      | 0.44 | 2.60921E-19 |
| AC126407.1 | 0.59 | 3.11346E-36 | TMBIM7P    | 0.44 | 2.67546E-19 |
| AC132872.1 | 0.59 | 4.01144E-36 | AC091905.1 | 0.44 | 2.79157E-19 |
| AC118758.2 | 0.59 | 4.28985E-36 | OR11Q1P    | 0.44 | 2.86858E-19 |
| AP001476.3 | 0.58 | 9.672E-36   | AL138831.3 | 0.44 | 3.09118E-19 |
| AL137001.2 | 0.58 | 1.1188E-35  | RNA5SP284  | 0.44 | 3.12719E-19 |
| SPATA31C2  | 0.58 | 1.59727E-35 | AL603839.3 | 0.44 | 3.18281E-19 |
| IGLVIV-59  | 0.58 | 1.88499E-35 | ACTBP8     | 0.44 | 3.54892E-19 |
| LINC00898  | 0.58 | 1.92734E-35 | ASB7       | 0.44 | 4.05142E-19 |
| GATAD1     | 0.58 | 2.34215E-35 | AC012625.1 | 0.44 | 4.06273E-19 |
| AC116666.1 | 0.58 | 3.18482E-35 | AC092803.1 | 0.44 | 4.29066E-19 |
| AL136162.1 | 0.58 | 5.04013E-35 | LINC02251  | 0.44 | 4.32484E-19 |
| AC106799.3 | 0.58 | 7.02789E-35 | AC119150.2 | 0.44 | 4.50898E-19 |
| NCOR1P2    | 0.58 | 8.63803E-35 | ANKRD20A8P | 0.44 | 5.80458E-19 |
| AC145350.2 | 0.58 | 1.64162E-34 | AC242842.1 | 0.44 | 6.18181E-19 |
| DUX4L37    | 0.58 | 1.64566E-34 | LINC02249  | 0.44 | 6.58316E-19 |
| LINC00442  | 0.57 | 2.47799E-34 | SPATA24    | 0.44 | 7.11061E-19 |
| AC137761.1 | 0.57 | 4.90779E-34 | AC239868.1 | 0.44 | 7.23255E-19 |
| AC023034.1 | 0.57 | 6.16433E-34 | AL161669.2 | 0.44 | 7.24903E-19 |
| AL356585.1 | 0.57 | 6.19296E-34 | AC106771.1 | 0.44 | 7.73149E-19 |
| AL132655.2 | 0.57 | 6.74107E-34 | AC006206.2 | 0.43 | 9.61784E-19 |
| MYO18B     | 0.57 | 6.88558E-34 | AC121342.1 | 0.43 | 9.66791E-19 |
| AL139254.3 | 0.57 | 7.86084E-34 | NDUFV2-AS1 | 0.43 | 1.01414E-18 |
| DANT1      | 0.57 | 8.35316E-34 | AP001425.1 | 0.43 | 1.06672E-18 |
| MKRN3      | 0.57 | 1.0977E-33  | AC001226.1 | 0.43 | 1.06888E-18 |
| OR7E149P   | 0.57 | 1.37351E-33 | PEX1       | 0.43 | 1.07641E-18 |
| AC124947.2 | 0.57 | 1.89717E-33 | AL137078.1 | 0.43 | 1.13597E-18 |
| CDH8       | 0.57 | 2.11929E-33 | AC126915.2 | 0.43 | 1.15195E-18 |
| AC000120.1 | 0.57 | 2.23515E-33 | LVRN       | 0.43 | 1.16706E-18 |
| AC103808.3 | 0.57 | 4.43141E-33 | LINC01233  | 0.43 | 1.1939E-18  |
| AC068473.5 | 0.57 | 4.58606E-33 | AL049557.1 | 0.43 | 1.19665E-18 |
| AC025811.1 | 0.57 | 4.7811E-33  | GUCY2D     | 0.43 | 1.20308E-18 |
| AC073869.7 | 0.56 | 6.6917E-33  | CTAG2      | 0.43 | 1.24829E-18 |
| H2BU2P     | 0.56 | 9.03993E-33 | ARID3A     | 0.43 | 1.27321E-18 |
| AC023024.1 | 0.56 | 9.26964E-33 | RARRES2P6  | 0.43 | 1.37678E-18 |

|             |      |             |            |      |             |
|-------------|------|-------------|------------|------|-------------|
| KRIT1       | 0.56 | 1.07001E-32 | PRSS44P    | 0.43 | 1.38213E-18 |
| RNA5SP359   | 0.56 | 2.09245E-32 | IRX4-AS1   | 0.43 | 1.43272E-18 |
| VPS50       | 0.56 | 3.0505E-32  | AC026801.2 | 0.43 | 1.43401E-18 |
| AC098656.1  | 0.56 | 3.08674E-32 | AC107464.2 | 0.43 | 1.46032E-18 |
| ZNF519P3    | 0.56 | 3.53138E-32 | GABPB1-IT1 | 0.43 | 1.49238E-18 |
| LINC00652   | 0.56 | 4.01066E-32 | AC099654.4 | 0.43 | 1.52868E-18 |
| AC183088.1  | 0.56 | 4.29819E-32 | AC005156.1 | 0.43 | 1.5489E-18  |
| AC060814.2  | 0.56 | 8.93401E-32 | AL356475.1 | 0.43 | 1.69414E-18 |
| CECR2       | 0.56 | 1.0428E-31  | AC025031.4 | 0.43 | 1.69716E-18 |
| SELENOS     | 0.56 | 1.04338E-31 | AP001468.1 | 0.43 | 1.81539E-18 |
| AC009271.2  | 0.55 | 1.26843E-31 | AC009812.4 | 0.43 | 1.8242E-18  |
| LINC02145   | 0.55 | 1.67504E-31 | GTF2IP6    | 0.43 | 1.8438E-18  |
| FAM169B     | 0.55 | 2.08073E-31 | SAA3P      | 0.43 | 1.95913E-18 |
| AC134684.11 | 0.55 | 2.13338E-31 | C11orf71   | 0.43 | 1.99233E-18 |
| AL137802.2  | 0.55 | 2.59514E-31 | AL358777.3 | 0.43 | 2.04654E-18 |
| POTEF       | 0.55 | 3.11771E-31 | MIR5087    | 0.43 | 2.09532E-18 |
| DSCR4-IT1   | 0.55 | 4.04868E-31 | CARS1P2    | 0.43 | 2.13328E-18 |
| DSCR4       | 0.55 | 5.39548E-31 | MTND6P29   | 0.43 | 2.17315E-18 |
| CST9LP2     | 0.55 | 1.08694E-30 | AC016710.1 | 0.43 | 2.27449E-18 |
| AC008443.2  | 0.55 | 1.17381E-30 | TCF15      | 0.43 | 2.47575E-18 |
| DBX1        | 0.55 | 1.19132E-30 | MIR2052HG  | 0.43 | 2.47984E-18 |
| AL031736.2  | 0.55 | 1.42178E-30 | RN7SKP106  | 0.43 | 2.53538E-18 |
| AL137100.3  | 0.55 | 1.60728E-30 | AC024361.1 | 0.43 | 2.56126E-18 |
| AL355602.1  | 0.55 | 2.01202E-30 | AP005262.1 | 0.43 | 3.14654E-18 |
| LINC01001   | 0.54 | 2.54604E-30 | LINC02456  | 0.43 | 3.5314E-18  |
| CR786580.1  | 0.54 | 3.34463E-30 | AL391152.1 | 0.43 | 3.61491E-18 |
| STK24-AS1   | 0.54 | 3.41888E-30 | C2orf16    | 0.43 | 3.70929E-18 |
| RNA5SP70    | 0.54 | 4.74951E-30 | NINL       | 0.43 | 3.80994E-18 |
| AC104667.1  | 0.54 | 5.77934E-30 | C2orf68    | 0.43 | 3.98878E-18 |
| AC012378.2  | 0.54 | 6.46451E-30 | AC007092.1 | 0.43 | 4.3437E-18  |
| YPEL5P1     | 0.54 | 8.31874E-30 | AC068205.2 | 0.43 | 4.34611E-18 |
| LINC02207   | 0.54 | 9.50111E-30 | FRG1GP     | 0.43 | 4.72617E-18 |
| LINC01056   | 0.54 | 1.01158E-29 | LINC01446  | 0.43 | 4.84807E-18 |
| CT45A1      | 0.54 | 1.13394E-29 | AL590822.3 | 0.43 | 5.29645E-18 |
| AC097382.3  | 0.54 | 1.86479E-29 | MIR718     | 0.43 | 5.77886E-18 |
| LUNAR1      | 0.54 | 1.87384E-29 | AC004597.1 | 0.43 | 6.26806E-18 |
| CR381670.2  | 0.54 | 1.95399E-29 | ALOX12P2   | 0.43 | 6.33378E-18 |
| NXF2        | 0.54 | 2.04924E-29 | NLRP3P1    | 0.43 | 6.72284E-18 |
| AF186192.1  | 0.54 | 2.15047E-29 | LINC02163  | 0.42 | 7.32405E-18 |
| AL137001.1  | 0.54 | 2.16177E-29 | MIR548AR   | 0.42 | 7.64309E-18 |
| AC073869.3  | 0.54 | 3.02519E-29 | SYCP2L     | 0.42 | 7.70302E-18 |
| AC113349.1  | 0.54 | 3.3008E-29  | TTC28-AS1  | 0.42 | 7.77264E-18 |

|            |      |             |            |      |             |
|------------|------|-------------|------------|------|-------------|
| CTAG1B     | 0.54 | 3.64158E-29 | UBAC2-AS1  | 0.42 | 7.96067E-18 |
| H2AZ1-DT   | 0.53 | 4.20851E-29 | LINC00540  | 0.42 | 9.49985E-18 |
| AC010608.2 | 0.53 | 4.88269E-29 | AC022031.2 | 0.42 | 9.56736E-18 |
| MRPS33P4   | 0.53 | 5.9217E-29  | ZNRD2-AS1  | 0.42 | 9.75915E-18 |
| CYP4F27P   | 0.53 | 6.8744E-29  | ARRDC4     | 0.42 | 1.09163E-17 |
| AC026341.3 | 0.53 | 8.80084E-29 | FP325330.3 | 0.42 | 1.11459E-17 |
| AC091271.1 | 0.53 | 9.03198E-29 | BRCA1P1    | 0.42 | 1.14951E-17 |
| FAM30B     | 0.53 | 1.03812E-28 | AC023141.2 | 0.42 | 1.21055E-17 |
| MRPS31P2   | 0.53 | 1.26033E-28 | AC012640.2 | 0.42 | 1.23122E-17 |
| AL589794.2 | 0.53 | 1.35784E-28 | TTC34      | 0.42 | 1.28241E-17 |
| AC139491.3 | 0.53 | 1.43979E-28 | AL355297.3 | 0.42 | 1.33929E-17 |
| LINC00648  | 0.53 | 1.60573E-28 | ASNSP1     | 0.42 | 1.43747E-17 |
| RBM48      | 0.53 | 1.7367E-28  | AC132192.2 | 0.42 | 1.56405E-17 |
| AC068544.2 | 0.53 | 2.08018E-28 | RAB6C-AS1  | 0.42 | 1.6122E-17  |
| AC063948.1 | 0.53 | 2.36297E-28 | LINC01666  | 0.42 | 1.61886E-17 |
| VN1R54P    | 0.53 | 3.22909E-28 | F11-AS1    | 0.42 | 1.62247E-17 |
| AC099489.1 | 0.53 | 3.73987E-28 | CYCSP41    | 0.42 | 1.66359E-17 |
| BCL11A     | 0.53 | 4.00793E-28 | AC018641.1 | 0.42 | 1.70927E-17 |
| AL590787.1 | 0.53 | 5.39212E-28 | AP003108.5 | 0.42 | 1.72805E-17 |
| LINC01756  | 0.53 | 5.45766E-28 | AP000873.2 | 0.42 | 1.77118E-17 |
| AL078622.1 | 0.52 | 8.74561E-28 | POTEH      | 0.42 | 1.81745E-17 |
| KIF25-AS1  | 0.52 | 9.10577E-28 | LINC01807  | 0.42 | 1.83723E-17 |
| MIR1285-1  | 0.52 | 9.48333E-28 | C17orf100  | 0.42 | 1.96896E-17 |
| AC026495.1 | 0.52 | 9.89194E-28 | H2BC19P    | 0.42 | 1.97748E-17 |
| AL117329.1 | 0.52 | 1.01991E-27 | AC009271.1 | 0.42 | 2.00626E-17 |
| AC005252.3 | 0.52 | 1.02357E-27 | PRR3       | 0.42 | 2.00981E-17 |
|            |      |             | SUGT1P4-   |      |             |
| TOLLIP-AS1 | 0.52 | 1.07927E-27 | STRA6LP    | 0.42 | 2.02924E-17 |
| AC090985.1 | 0.52 | 1.33286E-27 | AC092427.1 | 0.42 | 2.16307E-17 |
| SNRPA1     | 0.52 | 1.51857E-27 | AC109347.1 | 0.42 | 2.24633E-17 |
| ABHD17AP4  | 0.52 | 1.52442E-27 | AC104794.4 | 0.42 | 2.25472E-17 |
| AC116565.1 | 0.52 | 1.8304E-27  | AC026992.1 | 0.42 | 2.27803E-17 |
| NOTO       | 0.52 | 1.91657E-27 | AC099791.2 | 0.42 | 2.36138E-17 |
| AC090907.1 | 0.52 | 2.28102E-27 | RGL2       | 0.42 | 2.40681E-17 |
| AL136221.1 | 0.52 | 2.29991E-27 | AL445531.1 | 0.42 | 2.48953E-17 |
| AC010275.1 | 0.52 | 2.36475E-27 | LINC00052  | 0.42 | 2.5798E-17  |
| AL353801.3 | 0.52 | 2.38164E-27 | HLA-DRB9   | 0.42 | 2.73625E-17 |
| AC100812.1 | 0.52 | 2.39248E-27 | AC092685.1 | 0.42 | 2.79002E-17 |
| CHCHD2P7   | 0.52 | 2.46998E-27 | AC090970.2 | 0.42 | 2.91348E-17 |
| AC026108.1 | 0.52 | 2.6338E-27  | AL033530.1 | 0.42 | 3.02681E-17 |
| AL139384.1 | 0.52 | 2.67128E-27 | TOB1-AS1   | 0.42 | 3.06571E-17 |
| CLCP1      | 0.52 | 3.44245E-27 | PACSIN3    | 0.42 | 3.16604E-17 |

|             |      |             |             |      |             |
|-------------|------|-------------|-------------|------|-------------|
| AC112176.1  | 0.52 | 3.58394E-27 | CU633967.1  | 0.42 | 3.20201E-17 |
| LINC00865   | 0.52 | 3.58479E-27 | LINC01448   | 0.42 | 3.33121E-17 |
| SNCAIP      | 0.52 | 3.64756E-27 | DPP4-DT     | 0.42 | 3.38539E-17 |
| AL732372.2  | 0.52 | 3.8093E-27  | LINC00491   | 0.42 | 3.45215E-17 |
| AC090774.1  | 0.52 | 3.85324E-27 | HOXD9       | 0.42 | 3.54323E-17 |
| ZBED9       | 0.52 | 4.05206E-27 | AP005119.2  | 0.42 | 3.54879E-17 |
| BMS1P22     | 0.52 | 4.54695E-27 | AC092171.5  | 0.42 | 3.71402E-17 |
| RNU6-705P   | 0.52 | 5.19085E-27 | LINS1       | 0.42 | 3.80355E-17 |
| AC079160.1  | 0.52 | 6.93738E-27 | AC126177.6  | 0.42 | 3.95169E-17 |
| GNAS-AS1    | 0.52 | 6.97821E-27 | AC127455.1  | 0.42 | 4.26659E-17 |
| MIR653      | 0.52 | 7.27084E-27 | PCAT19      | 0.42 | 4.29154E-17 |
| AC108002.2  | 0.52 | 7.38845E-27 | AC036111.1  | 0.42 | 4.39798E-17 |
| AC091133.4  | 0.52 | 8.15716E-27 | ARIH2OS     | 0.42 | 4.46468E-17 |
| AC097532.2  | 0.52 | 8.60117E-27 | AL034550.3  | 0.42 | 4.56177E-17 |
| CAHM        | 0.51 | 9.23334E-27 | AL035427.1  | 0.42 | 4.56909E-17 |
| ADAMTS17    | 0.51 | 1.03842E-26 | TSPEAR-AS1  | 0.42 | 4.6601E-17  |
| AC090907.3  | 0.51 | 1.05338E-26 | AL022100.1  | 0.42 | 4.79999E-17 |
| ROBO3       | 0.51 | 1.11024E-26 | AC245100.7  | 0.41 | 4.98809E-17 |
| AC092634.3  | 0.51 | 1.30137E-26 | TCTE3       | 0.41 | 4.99848E-17 |
| KARS1P2     | 0.51 | 1.38412E-26 | AC092447.7  | 0.41 | 5.24057E-17 |
| AP001781.1  | 0.51 | 1.51833E-26 | NUS1P2      | 0.41 | 5.43084E-17 |
| KCNMB3P1    | 0.51 | 1.83475E-26 | AL357556.3  | 0.41 | 5.44255E-17 |
| LINC01456   | 0.51 | 2.04156E-26 | GTSE1-DT    | 0.41 | 5.5546E-17  |
| PRAME       | 0.51 | 2.15051E-26 | FRAS1       | 0.41 | 5.86708E-17 |
| HERC2P4     | 0.51 | 2.73612E-26 | RSL24D1P3   | 0.41 | 5.97704E-17 |
| AL359513.1  | 0.51 | 3.9253E-26  | AL023755.1  | 0.41 | 5.99459E-17 |
| AC011029.1  | 0.51 | 4.24635E-26 | AC129507.3  | 0.41 | 6.00149E-17 |
| AC125494.3  | 0.51 | 4.74413E-26 | MIR1305     | 0.41 | 6.42455E-17 |
| LINC02696   | 0.51 | 5.32167E-26 | LINC01639   | 0.41 | 6.54411E-17 |
| LINC01146   | 0.51 | 5.99206E-26 | ESRRAP2     | 0.41 | 6.54548E-17 |
| KIAA0895LP1 | 0.51 | 6.30211E-26 | AC016590.3  | 0.41 | 6.75487E-17 |
| AL691520.1  | 0.51 | 7.28807E-26 | AC010719.1  | 0.41 | 7.34395E-17 |
| NAALAD2     | 0.51 | 7.32526E-26 | AC026412.3  | 0.41 | 7.59267E-17 |
| AC136475.2  | 0.51 | 1.07174E-25 | C5orf34-AS1 | 0.41 | 7.93505E-17 |
| AC090527.3  | 0.50 | 1.32105E-25 | CASC20      | 0.41 | 8.30224E-17 |
| AC060780.2  | 0.50 | 1.42779E-25 | SULT1C4     | 0.41 | 8.32533E-17 |
| SLC25A3P3   | 0.50 | 1.45396E-25 | SSBL4P      | 0.41 | 8.39358E-17 |
| MIR647      | 0.50 | 1.5159E-25  | AC007383.1  | 0.41 | 1.04138E-16 |
| H2AZ2P1     | 0.50 | 1.6815E-25  | AC099565.1  | 0.41 | 1.0754E-16  |
| AC068831.5  | 0.50 | 2.69026E-25 | SLC47A1P2   | 0.41 | 1.08346E-16 |
| CNTN5       | 0.50 | 2.88314E-25 | AL358780.1  | 0.41 | 1.10876E-16 |
| AC016355.1  | 0.50 | 3.10192E-25 | AC119751.4  | 0.41 | 1.13696E-16 |

|              |      |             |             |      |             |
|--------------|------|-------------|-------------|------|-------------|
| DSCR8        | 0.50 | 3.21923E-25 | AC069061.2  | 0.41 | 1.20485E-16 |
| AL645929.1   | 0.50 | 3.32181E-25 | AC095057.3  | 0.41 | 1.31096E-16 |
| AC005391.1   | 0.50 | 3.35162E-25 | AL023802.1  | 0.41 | 1.31778E-16 |
| AC022762.1   | 0.50 | 3.92163E-25 | AVP         | 0.41 | 1.32487E-16 |
| LRRC28       | 0.50 | 4.17447E-25 | TSKS        | 0.41 | 1.34364E-16 |
| PASD1        | 0.50 | 4.24969E-25 | RNA5SP532   | 0.41 | 1.34427E-16 |
| PCDHB5       | 0.50 | 4.77229E-25 | IGF2BP1     | 0.41 | 1.37118E-16 |
| RN7SL832P    | 0.50 | 5.13957E-25 | PXN-AS1     | 0.41 | 1.39419E-16 |
| PLAG1        | 0.50 | 6.164E-25   | POM121L2    | 0.41 | 1.44059E-16 |
| AC135068.2   | 0.50 | 6.2877E-25  | OBSCN-AS1   | 0.41 | 1.4563E-16  |
| MRPL46       | 0.50 | 7.4346E-25  | LINC01793   | 0.41 | 1.54603E-16 |
| PARTICL      | 0.50 | 7.70311E-25 | USP32P3     | 0.41 | 1.56911E-16 |
| AC109583.1   | 0.50 | 9.11713E-25 | RNVU1-26    | 0.41 | 1.58117E-16 |
| AL139042.1   | 0.50 | 9.31676E-25 | AL132765.2  | 0.41 | 1.70509E-16 |
| AP000640.1   | 0.50 | 1.00221E-24 | AC097374.1  | 0.41 | 1.79832E-16 |
| AC073488.6   | 0.50 | 1.05898E-24 | AL137077.2  | 0.41 | 1.83725E-16 |
| AC139491.1   | 0.50 | 1.11634E-24 | MRPL45P2    | 0.41 | 1.88085E-16 |
| AC091925.1   | 0.50 | 1.13895E-24 | AC097639.1  | 0.41 | 1.89416E-16 |
| AC017083.1   | 0.50 | 1.27789E-24 | AC092745.4  | 0.41 | 2.10995E-16 |
| AC073578.2   | 0.50 | 1.29602E-24 | MKS1        | 0.41 | 2.25634E-16 |
| AC000032.1   | 0.49 | 1.44654E-24 | LMCD1-AS1   | 0.41 | 2.36244E-16 |
| AC118658.1   | 0.49 | 1.67631E-24 | SNORD115-32 | 0.41 | 2.48457E-16 |
| EIF2AK3-DT   | 0.49 | 1.68017E-24 | HOXD1       | 0.41 | 2.54934E-16 |
| COA6-AS1     | 0.49 | 1.68924E-24 | AC027584.1  | 0.41 | 2.63271E-16 |
| DUX4L27      | 0.49 | 1.99458E-24 | AP005057.1  | 0.41 | 2.75529E-16 |
| AC009084.2   | 0.49 | 2.29218E-24 | LINC00508   | 0.41 | 2.86628E-16 |
| AC010999.2   | 0.49 | 2.30777E-24 | AP005119.1  | 0.41 | 3.01384E-16 |
| AC008443.5   | 0.49 | 2.33213E-24 | AC096633.1  | 0.40 | 3.59475E-16 |
| AL844170.1   | 0.49 | 2.38733E-24 | AL596442.3  | 0.40 | 3.60224E-16 |
| AL356596.1   | 0.49 | 2.55071E-24 | PAN3-AS1    | 0.40 | 3.77228E-16 |
| AC023024.2   | 0.49 | 2.85737E-24 | AC007881.3  | 0.40 | 3.82249E-16 |
| LINC02550    | 0.49 | 3.02149E-24 | HNRNPA1P62  | 0.40 | 3.94534E-16 |
| OXCT2        | 0.49 | 3.23859E-24 | AC002056.2  | 0.40 | 3.96214E-16 |
| NKAIN1P2     | 0.49 | 3.25021E-24 | AL590326.1  | 0.40 | 3.9726E-16  |
| FAM133B      | 0.49 | 4.88211E-24 | PRR23D3P    | 0.40 | 4.06493E-16 |
| AC114956.1   | 0.49 | 5.44824E-24 | AC011370.1  | 0.40 | 4.23327E-16 |
| AC062029.1   | 0.49 | 5.65318E-24 | HOXD13      | 0.40 | 4.30923E-16 |
| PANK2-AS1    | 0.49 | 6.53301E-24 | AC003973.2  | 0.40 | 4.37886E-16 |
| AP001476.1   | 0.49 | 7.16568E-24 | RN7SKP184   | 0.40 | 4.46502E-16 |
| CCDC39-AS1   | 0.49 | 7.18203E-24 | AMZ2P3      | 0.40 | 4.70798E-16 |
| MRGPRX13P    | 0.49 | 7.47592E-24 | C8orf44     | 0.40 | 4.95919E-16 |
| IGHD1OR15-1A | 0.49 | 7.6533E-24  | AL132780.2  | 0.40 | 4.98805E-16 |

|            |      |             |            |      |             |
|------------|------|-------------|------------|------|-------------|
| ABHD17AP5  | 0.49 | 7.92705E-24 | TULP1      | 0.40 | 5.01468E-16 |
| FAM41C     | 0.49 | 8.2899E-24  | AL356123.2 | 0.40 | 5.03084E-16 |
| AC099684.2 | 0.49 | 1.0296E-23  | MTND4P4    | 0.40 | 5.16277E-16 |
| AC245517.3 | 0.49 | 1.05734E-23 | NRBF2P2    | 0.40 | 5.36853E-16 |
| HSPA8P13   | 0.49 | 1.08219E-23 | AL121658.1 | 0.40 | 5.53013E-16 |
| AC016825.1 | 0.49 | 1.25938E-23 | UCKL1      | 0.40 | 5.63876E-16 |
| AL390198.1 | 0.49 | 1.4316E-23  | AC108727.1 | 0.40 | 5.71171E-16 |
| AC022819.1 | 0.49 | 1.47369E-23 | IQCG       | 0.40 | 5.82199E-16 |
| LINC02610  | 0.49 | 1.52698E-23 | C17orf113  | 0.40 | 5.98153E-16 |
| AC037479.1 | 0.48 | 1.84202E-23 | AL023806.1 | 0.40 | 6.13024E-16 |
| HOXD10     | 0.48 | 1.99421E-23 | SEMA6A-AS1 | 0.40 | 6.21252E-16 |
| SLC25A15P4 | 0.48 | 2.72693E-23 | CYP51A1    | 0.40 | 6.32162E-16 |
| AL080284.1 | 0.48 | 3.16024E-23 | NEU1       | 0.40 | 6.38871E-16 |
| LINC01977  | 0.48 | 3.36136E-23 | AL133243.2 | 0.40 | 6.68283E-16 |
| ITPR1-DT   | 0.48 | 3.64594E-23 | AC126177.5 | 0.40 | 6.79099E-16 |
| AC145350.3 | 0.48 | 3.69945E-23 | AL008636.1 | 0.40 | 6.81278E-16 |
| KLF14      | 0.48 | 3.72439E-23 | GPR176-DT  | 0.40 | 6.90954E-16 |
| F10-AS1    | 0.48 | 3.76119E-23 | MTCYBP29   | 0.40 | 6.91529E-16 |
| AC108488.3 | 0.48 | 4.06718E-23 | LINC00470  | 0.40 | 7.02367E-16 |
| AC092335.1 | 0.48 | 4.15732E-23 | LINC01415  | 0.40 | 7.06091E-16 |
| AC008124.1 | 0.48 | 4.25219E-23 | AC069544.1 | 0.40 | 7.06281E-16 |
| AC015961.2 | 0.48 | 4.67501E-23 | AL158070.2 | 0.40 | 7.52985E-16 |
| AL442067.3 | 0.48 | 5.40062E-23 | AC090589.3 | 0.40 | 7.89382E-16 |
| NOC2LP1    | 0.48 | 5.5552E-23  | AC009955.4 | 0.40 | 7.9067E-16  |
| AL513550.1 | 0.48 | 5.60518E-23 | AL021707.2 | 0.40 | 7.94752E-16 |
| LINC02315  | 0.48 | 6.35585E-23 | ISX        | 0.40 | 8.05589E-16 |
| ATP1A1-AS1 | 0.48 | 6.49526E-23 | ASXL1      | 0.40 | 8.34074E-16 |
| ZNF334     | 0.48 | 7.02134E-23 | AC073389.3 | 0.40 | 8.34783E-16 |
| FAM230C    | 0.48 | 7.21929E-23 | AL713922.1 | 0.40 | 8.48395E-16 |
| AC119403.1 | 0.48 | 7.92969E-23 | OFCC1      | 0.40 | 9.76771E-16 |
| HERC2P5    | 0.48 | 8.0436E-23  | AL133153.1 | 0.40 | 1.05731E-15 |
| AC026671.1 | 0.48 | 8.81674E-23 | VN1R71P    | 0.40 | 1.09336E-15 |
| AFDN-DT    | 0.48 | 8.91016E-23 | FAR2P3     | 0.40 | 1.09748E-15 |
| MIR4453HG  | 0.48 | 9.30321E-23 | LINC00482  | 0.40 | 1.11314E-15 |
| AC007566.1 | 0.48 | 9.38181E-23 | C5orf58    | 0.40 | 1.1415E-15  |
| SYN3       | 0.48 | 9.82099E-23 | AC092910.3 | 0.40 | 1.18209E-15 |
| AL132655.1 | 0.48 | 1.00455E-22 | NIFK-AS1   | 0.40 | 1.1961E-15  |
| ZNF560     | 0.48 | 1.00563E-22 | AL161669.3 | 0.40 | 1.24573E-15 |
| AACSP1     | 0.48 | 1.02921E-22 | AC006206.1 | 0.40 | 1.24746E-15 |
| AC132807.2 | 0.48 | 1.03799E-22 | AP000829.1 | 0.40 | 1.26474E-15 |
| SLC6A13    | 0.48 | 1.11228E-22 | LINC01592  | 0.40 | 1.26817E-15 |
| CALN1      | 0.48 | 1.312E-22   | ZNF519     | 0.40 | 1.30209E-15 |

---

|            |      |             |            |      |             |
|------------|------|-------------|------------|------|-------------|
| AC093627.5 | 0.48 | 1.3307E-22  | AC090517.2 | 0.40 | 1.33514E-15 |
| HMGN2P15   | 0.48 | 1.48605E-22 | LINC01143  | 0.40 | 1.35777E-15 |
| AC021087.3 | 0.48 | 1.54522E-22 | DNMT3B     | 0.40 | 1.3625E-15  |
| AC090826.1 | 0.48 | 1.59518E-22 | AC010894.1 | 0.40 | 1.38639E-15 |
| EXOC3-AS1  | 0.48 | 1.66187E-22 | GUSBP10    | 0.40 | 1.41835E-15 |
| SALL4      | 0.47 | 1.87902E-22 | AL355596.1 | 0.40 | 1.44407E-15 |
| CTAG1A     | 0.47 | 1.9066E-22  | LINC01424  | 0.40 | 1.44803E-15 |
| AC140479.3 | 0.47 | 1.91627E-22 | FRG1FP     | 0.40 | 1.53329E-15 |
| ZNF280A    | 0.47 | 2.02049E-22 | MBL1P      | 0.40 | 1.54085E-15 |
| AC135068.8 | 0.47 | 2.06172E-22 | AC237221.2 | 0.40 | 1.54714E-15 |
| AC023824.3 | 0.47 | 2.08943E-22 | AC233702.1 | 0.40 | 1.65269E-15 |
| AC129926.2 | 0.47 | 2.17469E-22 | AGGF1P10   | 0.40 | 1.67012E-15 |
| AL357833.1 | 0.47 | 2.30575E-22 | AC239859.5 | 0.40 | 1.69189E-15 |
| AC084855.2 | 0.47 | 2.30899E-22 | ZNF682     | 0.40 | 1.70222E-15 |
|            |      |             | FOXN4      | 0.40 | 1.74826E-15 |

---



**Table S6.** Genes significantly correlated with LINC01087 expression in testicular germ cell tumor carcinoma (TCGA).

| Gene symbol | Positive<br>R value | P-value     | Gene symbol | Positive<br>R value | P-value     |
|-------------|---------------------|-------------|-------------|---------------------|-------------|
| POTEKP      | 0.98                | 8.011E-106  | CYP4F27P    | 0.47                | 7.00781E-10 |
| AC093838.1  | 0.89                | 3.03876E-55 | DEFB108B    | 0.47                | 7.10577E-10 |
| MED15P4     | 0.88                | 2.52966E-52 | AC008080.2  | 0.47                | 7.1239E-10  |
| LINC01518   | 0.87                | 3.84773E-50 | LYPD9P      | 0.47                | 7.26741E-10 |
| FAR2P4      | 0.86                | 3.92245E-46 | LINC02470   | 0.47                | 7.36368E-10 |
| NEK2P4      | 0.81                | 9.36716E-38 | TSPAN18-AS1 | 0.47                | 8.28077E-10 |
| KLF2P4      | 0.81                | 1.18027E-37 | MROH2A      | 0.47                | 8.50081E-10 |
| GRAMD4P8    | 0.80                | 5.04393E-36 | AC063977.4  | 0.47                | 8.74424E-10 |
| NF1P8       | 0.78                | 1.75758E-33 | AP002008.2  | 0.47                | 9.01823E-10 |
| CR769776.3  | 0.78                | 9.33232E-33 | AC083906.4  | 0.47                | 9.20414E-10 |
| KLF2P1      | 0.77                | 2.21707E-32 | ABTB2       | 0.47                | 9.28077E-10 |
| POTEF       | 0.74                | 8.56954E-28 | AP001992.1  | 0.46                | 9.62062E-10 |
| AC245517.2  | 0.73                | 2.43827E-27 | AC023468.1  | 0.46                | 9.99099E-10 |
| NF1P7       | 0.73                | 3.6848E-27  | AC007846.1  | 0.46                | 1.04852E-09 |
| SNORD56B    | 0.73                | 3.98763E-27 | LINC02527   | 0.46                | 1.05081E-09 |
| AC135068.1  | 0.73                | 4.77114E-27 | RNA5SP65    | 0.46                | 1.15159E-09 |
| ANKRD20A1   | 0.72                | 1.64792E-26 | AC022400.8  | 0.46                | 1.18377E-09 |
| NEK2P1      | 0.72                | 1.84012E-26 | AC025539.1  | 0.46                | 1.27643E-09 |
| AL512310.11 | 0.72                | 2.47755E-26 | CTAG1A      | 0.46                | 1.33471E-09 |
| CTCFL       | 0.72                | 3.78984E-26 | VCX3B       | 0.46                | 1.34733E-09 |
| AC018865.2  | 0.72                | 5.01659E-26 | AC114401.1  | 0.46                | 1.39734E-09 |
| NCOR1P2     | 0.72                | 8.40193E-26 | CTAG2       | 0.46                | 1.43191E-09 |
| AC073869.3  | 0.71                | 2.64017E-25 | AC114485.1  | 0.46                | 1.52085E-09 |
| AC245517.4  | 0.71                | 6.97186E-25 | PRSS43P     | 0.46                | 1.54414E-09 |
| RNU6-508P   | 0.70                | 1.12728E-24 | MED15P1     | 0.46                | 1.56473E-09 |
| RNA5SP133   | 0.70                | 1.12728E-24 | SLC25A18    | 0.46                | 1.57752E-09 |
| RNU6-115P   | 0.70                | 1.12728E-24 | LINC02022   | 0.46                | 1.67739E-09 |
| RNU6-741P   | 0.70                | 1.12728E-24 | BX664727.3  | 0.46                | 1.68903E-09 |
| BX088651.1  | 0.70                | 1.12728E-24 | AC016903.2  | 0.46                | 1.73231E-09 |
| RNU6ATAC41P | 0.70                | 1.12728E-24 | AC136431.1  | 0.46                | 2.03601E-09 |
| RN7SKP59    | 0.70                | 1.12728E-24 | TPM3P9      | 0.46                | 2.05863E-09 |
| FAM197Y5    | 0.70                | 1.12728E-24 | AC244102.1  | 0.46                | 2.21691E-09 |
| AL035417.1  | 0.70                | 1.12728E-24 | AP002449.1  | 0.46                | 2.40564E-09 |
| AC007967.2  | 0.70                | 1.12728E-24 | TCHH        | 0.45                | 2.44196E-09 |
| AL135790.2  | 0.70                | 1.12728E-24 | AL080276.1  | 0.45                | 2.49868E-09 |
| MTND6P14    | 0.70                | 1.12728E-24 | CPB2        | 0.45                | 2.6008E-09  |
| AL354766.1  | 0.70                | 1.12728E-24 | AL132655.1  | 0.45                | 2.62247E-09 |
| RPL30P5     | 0.70                | 1.12728E-24 | AP005210.2  | 0.45                | 2.69372E-09 |

|                |      |             |            |      |             |
|----------------|------|-------------|------------|------|-------------|
| AC113347.2     | 0.70 | 1.12728E-24 | AC007114.2 | 0.45 | 2.73821E-09 |
| AC010625.1     | 0.70 | 1.12728E-24 | MIR6779    | 0.45 | 3.01021E-09 |
| OR11H3P        | 0.70 | 1.12728E-24 | AC003093.1 | 0.45 | 3.05425E-09 |
| MIR3199-1      | 0.70 | 1.12728E-24 | ZNF705E    | 0.45 | 3.07008E-09 |
| AC010655.4     | 0.70 | 1.12728E-24 | RNA5SP131  | 0.45 | 3.14997E-09 |
| RN7SL719P      | 0.70 | 1.12728E-24 | AL391380.1 | 0.45 | 3.32723E-09 |
| IGHD2OR15-2B   | 0.70 | 1.12728E-24 | RAB6D      | 0.45 | 3.39262E-09 |
| AC140658.3     | 0.70 | 3.05794E-24 | AC121247.2 | 0.45 | 3.40768E-09 |
| POTEI          | 0.69 | 2.57725E-23 | MRGPRX8P   | 0.45 | 3.40926E-09 |
| VN1R54P        | 0.68 | 7.45637E-23 | GAB2       | 0.45 | 3.44726E-09 |
| AC131280.1     | 0.68 | 8.60713E-23 | AC104009.1 | 0.45 | 3.57582E-09 |
| ANKRD20A3P     | 0.68 | 1.50593E-22 | LINC01432  | 0.45 | 3.57689E-09 |
| NF1P6          | 0.68 | 2.2286E-22  | MIR3164    | 0.45 | 3.63077E-09 |
| AC023310.4     | 0.68 | 2.72791E-22 | ATP6V1B1   | 0.45 | 3.64006E-09 |
| AC009477.1     | 0.68 | 3.21873E-22 | AL355377.4 | 0.45 | 3.70641E-09 |
| FAR2P1         | 0.68 | 4.32718E-22 | AF099810.1 | 0.45 | 3.74163E-09 |
| LINC02203      | 0.67 | 1.78447E-21 | RN7SKP241  | 0.45 | 3.88304E-09 |
| IGHV1-14       | 0.67 | 2.01231E-21 | MTCO1P48   | 0.45 | 3.98281E-09 |
| AC037471.1     | 0.65 | 1.87027E-20 | AC007064.2 | 0.45 | 4.07884E-09 |
| POTEE          | 0.65 | 2.28188E-20 | RPS17P14   | 0.45 | 4.16846E-09 |
| IGKV2-28       | 0.65 | 4.90488E-20 | E2F3-IT1   | 0.45 | 4.18381E-09 |
| AC135068.2     | 0.65 | 6.20793E-20 | MTCP1      | 0.45 | 4.26421E-09 |
| POTEH          | 0.64 | 1.34161E-19 | AC004453.2 | 0.45 | 4.57567E-09 |
| AC135068.11    | 0.64 | 2.05878E-19 | LINC01804  | 0.45 | 4.80121E-09 |
| AC140481.3     | 0.64 | 2.20318E-19 | SMCR5      | 0.45 | 4.91214E-09 |
| ART1           | 0.64 | 3.90504E-19 | OR2L2      | 0.45 | 4.96816E-09 |
| RNU6-71P       | 0.64 | 5.01809E-19 | GAL3ST1    | 0.45 | 5.12443E-09 |
| ABBA01006766.1 | 0.63 | 8.39729E-19 | PRSS38     | 0.45 | 5.16086E-09 |
| AC100757.2     | 0.63 | 1.53603E-18 | GTF2IP3    | 0.45 | 5.38714E-09 |
| AC183088.2     | 0.63 | 1.55752E-18 | ZNF280A    | 0.45 | 5.49502E-09 |
| RPSAP58        | 0.63 | 1.56319E-18 | AC137695.2 | 0.45 | 5.60929E-09 |
| AC127381.1     | 0.63 | 2.72803E-18 | AC027313.1 | 0.45 | 5.62987E-09 |
| GPAT2P1        | 0.62 | 4.43589E-18 | AL627223.1 | 0.45 | 5.69997E-09 |
| AL929601.1     | 0.62 | 6.71884E-18 | PGBP       | 0.45 | 5.81942E-09 |
| UBBP4          | 0.62 | 8.18432E-18 | KRTAP6-1   | 0.45 | 5.83532E-09 |
| IGHJ5          | 0.62 | 8.52603E-18 | RPS15P9    | 0.44 | 5.88823E-09 |
| PCP4L1         | 0.61 | 2.33987E-17 | AC093110.1 | 0.44 | 5.98625E-09 |
| TMEM132D-AS1   | 0.61 | 2.62555E-17 | AC002525.1 | 0.44 | 6.32284E-09 |
| NBEAP1         | 0.60 | 7.76719E-17 | GRAMD4P3   | 0.44 | 6.63112E-09 |
| NHP2P1         | 0.60 | 1.39182E-16 | LINC02646  | 0.44 | 6.78084E-09 |
| RCVRN          | 0.60 | 1.42076E-16 | ELF2P4     | 0.44 | 6.80746E-09 |
| AC074389.2     | 0.60 | 2.02359E-16 | BTBD10     | 0.44 | 6.87693E-09 |

|              |      |             |            |      |             |
|--------------|------|-------------|------------|------|-------------|
| NF1P4        | 0.59 | 3.78413E-16 | AL023773.1 | 0.44 | 6.97912E-09 |
| THUMPD3P1    | 0.59 | 5.47711E-16 | AC006972.1 | 0.44 | 7.33173E-09 |
| KRTAP19-8    | 0.59 | 7.03208E-16 | AC027419.1 | 0.44 | 7.58908E-09 |
| AC005521.1   | 0.59 | 7.43929E-16 | AL451142.1 | 0.44 | 7.67731E-09 |
| IGHVII-43-1  | 0.58 | 1.13868E-15 | RAC3       | 0.44 | 7.76981E-09 |
| NF1P10       | 0.58 | 1.15355E-15 | AC110015.1 | 0.44 | 7.87069E-09 |
| AL157886.1   | 0.58 | 1.16882E-15 | RNU6-1048P | 0.44 | 8.50763E-09 |
| AL353726.1   | 0.58 | 1.35171E-15 | AC010145.1 | 0.44 | 9.33009E-09 |
| RN7SKP204    | 0.58 | 1.38975E-15 | MED15P9    | 0.44 | 9.9481E-09  |
| AC007923.1   | 0.58 | 1.5461E-15  | MIR4433B   | 0.44 | 1.0498E-08  |
| MED15P8      | 0.58 | 1.54797E-15 | DQX1       | 0.44 | 1.06731E-08 |
| AL033523.2   | 0.58 | 1.62385E-15 | TUBAP7     | 0.44 | 1.08638E-08 |
| AC097374.1   | 0.58 | 1.79092E-15 | AC087393.1 | 0.44 | 1.09976E-08 |
| EDDM3A       | 0.58 | 2.22172E-15 | LINC01193  | 0.44 | 1.15334E-08 |
| AC079466.1   | 0.58 | 2.29111E-15 | ORM2       | 0.44 | 1.17819E-08 |
| CGREF1       | 0.58 | 2.86023E-15 | FAM9A      | 0.44 | 1.18622E-08 |
| AL356489.4   | 0.58 | 4.12501E-15 | TTC21B-AS1 | 0.44 | 1.19473E-08 |
| AL139327.1   | 0.57 | 4.3419E-15  | Z82185.1   | 0.44 | 1.19662E-08 |
| AL445985.2   | 0.57 | 4.6646E-15  | GGT3P      | 0.44 | 1.2831E-08  |
| MAGEA1       | 0.57 | 5.70977E-15 | AL139095.2 | 0.44 | 1.29052E-08 |
| SSXP1        | 0.57 | 5.7326E-15  | PABPC1P10  | 0.44 | 1.30718E-08 |
| RNU6-873P    | 0.57 | 5.7326E-15  | GABRA6     | 0.44 | 1.34587E-08 |
| RN7SKP93     | 0.57 | 5.7326E-15  | AC121161.2 | 0.43 | 1.39961E-08 |
| RNA5SP516    | 0.57 | 5.7326E-15  | AL512329.1 | 0.43 | 1.41644E-08 |
| MIR1238      | 0.57 | 5.7326E-15  | USP17L2    | 0.43 | 1.45413E-08 |
| CDKN2AIPNLP3 | 0.57 | 5.7326E-15  | RN7SL812P  | 0.43 | 1.46257E-08 |
| NDUFA12P1    | 0.57 | 5.7326E-15  | AC003686.1 | 0.43 | 1.4855E-08  |
| Z98751.1     | 0.57 | 5.7326E-15  | MIR4740    | 0.43 | 1.54195E-08 |
| ZNF886P      | 0.57 | 5.7326E-15  | OR56A5     | 0.43 | 1.54955E-08 |
| TPMTP3       | 0.57 | 5.7326E-15  | AC068058.1 | 0.43 | 1.65384E-08 |
| BX284632.1   | 0.57 | 5.7326E-15  | RPL3P8     | 0.43 | 1.74703E-08 |
| RN7SL654P    | 0.57 | 5.7326E-15  | AC083806.3 | 0.43 | 1.78355E-08 |
| AC012087.2   | 0.57 | 5.7326E-15  | ELOCP27    | 0.43 | 1.80531E-08 |
| AC241929.1   | 0.57 | 5.7326E-15  | STAM-AS1   | 0.43 | 1.83037E-08 |
| AL590410.1   | 0.57 | 5.7326E-15  | RPS6P2     | 0.43 | 1.85083E-08 |
| VCX3A        | 0.57 | 5.97833E-15 | RPS3AP13   | 0.43 | 1.88636E-08 |
| AC138035.2   | 0.57 | 6.21263E-15 | RN7SL523P  | 0.43 | 1.89996E-08 |
| AC139365.2   | 0.57 | 9.38106E-15 | AF064863.1 | 0.43 | 1.90657E-08 |
| LINC02780    | 0.57 | 1.02428E-14 | MAGEA6     | 0.43 | 1.91278E-08 |
| CENPIP1      | 0.57 | 1.17023E-14 | AL109933.3 | 0.43 | 1.96991E-08 |
| PNMA6E       | 0.57 | 1.23392E-14 | RAP1AP     | 0.43 | 1.97856E-08 |
| AC006927.5   | 0.57 | 1.27993E-14 | ACVR2B     | 0.43 | 1.98147E-08 |

|            |      |             |            |      |             |
|------------|------|-------------|------------|------|-------------|
| VCX2       | 0.57 | 1.34191E-14 | RNU6-1143P | 0.43 | 1.98309E-08 |
| FP325317.2 | 0.57 | 1.43499E-14 | AC108865.1 | 0.43 | 1.9934E-08  |
| AC244107.1 | 0.57 | 1.45229E-14 | AL121949.3 | 0.43 | 2.07417E-08 |
| AC132938.6 | 0.57 | 1.51749E-14 | AL132775.2 | 0.43 | 2.07983E-08 |
| BX664718.1 | 0.56 | 1.59868E-14 | LINC00244  | 0.43 | 2.08321E-08 |
| LINC01029  | 0.56 | 1.7296E-14  | AL929236.1 | 0.43 | 2.10327E-08 |
| OMP        | 0.56 | 1.97292E-14 | ANKRD36    | 0.43 | 2.11599E-08 |
| AC107886.1 | 0.56 | 1.98717E-14 | ARPP19P1   | 0.43 | 2.1624E-08  |
| LINC00454  | 0.56 | 2.57957E-14 | LINC01587  | 0.43 | 2.17281E-08 |
| FO082842.1 | 0.56 | 4.14976E-14 | ZNF761     | 0.43 | 2.175E-08   |
| MAGEA9B    | 0.56 | 4.62765E-14 | AL159987.2 | 0.43 | 2.1824E-08  |
| AC100757.1 | 0.56 | 4.62827E-14 | AL110505.1 | 0.43 | 2.19526E-08 |
| SNX18P9    | 0.56 | 4.81782E-14 | AL359198.1 | 0.43 | 2.25291E-08 |
| LINC01639  | 0.55 | 7.42967E-14 | AL121894.3 | 0.43 | 2.27436E-08 |
| NF1P9      | 0.55 | 7.96523E-14 | MIR4632    | 0.43 | 2.31714E-08 |
| OR7E16P    | 0.55 | 8.17789E-14 | NDUFS5P2   | 0.43 | 2.32873E-08 |
| AL121949.2 | 0.55 | 8.30323E-14 | AC023090.2 | 0.43 | 2.36316E-08 |
| OR52E3P    | 0.55 | 9.58919E-14 | NF1P1      | 0.43 | 2.39318E-08 |
| HM13-AS1   | 0.55 | 1.04152E-13 | PRSS40B    | 0.43 | 2.41051E-08 |
| AC116666.1 | 0.55 | 1.20455E-13 | PCAT7      | 0.43 | 2.4416E-08  |
| TPM3P6     | 0.55 | 1.29967E-13 | ABHD17AP4  | 0.43 | 2.45501E-08 |
| GPAT2      | 0.55 | 1.3979E-13  | TPT1P3     | 0.43 | 2.61385E-08 |
| RN7SKP209  | 0.55 | 1.5141E-13  | AC018358.1 | 0.43 | 2.61711E-08 |
| AC092490.1 | 0.55 | 1.60729E-13 | IGLVV-58   | 0.43 | 2.62069E-08 |
|            |      |             | TMEM147-   |      |             |
| AC008543.2 | 0.55 | 1.68139E-13 | AS1        | 0.43 | 2.76716E-08 |
| OR7E4P     | 0.55 | 1.68849E-13 | CYP4X1     | 0.43 | 2.82803E-08 |
| GPR55      | 0.54 | 1.93361E-13 | AC025031.4 | 0.43 | 3.01838E-08 |
| PHF2P2     | 0.54 | 2.06319E-13 | AC073862.3 | 0.43 | 3.07314E-08 |
| LINC01251  | 0.54 | 2.21298E-13 | NOC2LP2    | 0.43 | 3.14451E-08 |
| GPR151     | 0.54 | 2.25819E-13 | DENND2C    | 0.42 | 3.20329E-08 |
| AC011997.2 | 0.54 | 2.59748E-13 | ANKRD20A7P | 0.42 | 3.26122E-08 |
| AP000244.1 | 0.54 | 2.71509E-13 | DEFB108C   | 0.42 | 3.28577E-08 |
| AC068790.3 | 0.54 | 2.7895E-13  | AL139109.1 | 0.42 | 3.2962E-08  |
| AC068790.5 | 0.54 | 2.81542E-13 | AC005520.1 | 0.42 | 3.36076E-08 |
| USP24P1    | 0.54 | 3.90859E-13 | LINC00470  | 0.42 | 3.51665E-08 |
| RNU6-1306P | 0.54 | 4.13333E-13 | NBPF17P    | 0.42 | 3.55508E-08 |
| AL513478.4 | 0.54 | 4.5442E-13  | SYNDIG1L   | 0.42 | 3.56249E-08 |
| ELK2BP     | 0.54 | 5.9921E-13  | RNU6-1283P | 0.42 | 3.57256E-08 |
| AC005006.1 | 0.53 | 6.55492E-13 | AC239859.1 | 0.42 | 3.64605E-08 |
| SLC5A11    | 0.53 | 6.8714E-13  | AC009102.4 | 0.42 | 3.75171E-08 |
| VCX        | 0.53 | 7.40679E-13 | BCRP7      | 0.42 | 3.83201E-08 |

|              |      |             |            |      |             |
|--------------|------|-------------|------------|------|-------------|
| AL021937.3   | 0.53 | 7.57565E-13 | EDDM3B     | 0.42 | 3.93336E-08 |
| AC114752.2   | 0.53 | 7.82049E-13 | CLDN18     | 0.42 | 4.30394E-08 |
| CCDC144NL    | 0.53 | 9.41655E-13 | KPNB1P1    | 0.42 | 4.57454E-08 |
| AC066580.1   | 0.53 | 9.41758E-13 | RGPD5      | 0.42 | 4.68686E-08 |
| MED15P6      | 0.53 | 9.84272E-13 | LINC02365  | 0.42 | 4.75159E-08 |
| AC016687.3   | 0.53 | 1.15873E-12 | CSAG1      | 0.42 | 4.78361E-08 |
| AC005291.1   | 0.53 | 1.20562E-12 | TPTE2P1    | 0.42 | 4.85793E-08 |
| ANKRD18DP    | 0.53 | 1.21692E-12 | AC048337.1 | 0.42 | 4.91992E-08 |
| AC092623.1   | 0.53 | 1.25586E-12 | MOBP       | 0.42 | 4.92016E-08 |
| DPRXP1       | 0.53 | 1.53958E-12 | AL929601.2 | 0.42 | 4.92963E-08 |
| NUTF2P4      | 0.53 | 1.59339E-12 | AL049765.2 | 0.42 | 5.04123E-08 |
| MAGEA10      | 0.53 | 1.66413E-12 | AC131180.1 | 0.42 | 5.06147E-08 |
| LINC02675    | 0.53 | 1.71517E-12 | AP005205.3 | 0.42 | 5.10978E-08 |
| AC092803.2   | 0.53 | 1.73757E-12 | AL731557.1 | 0.42 | 5.18726E-08 |
| APOBEC3B-AS1 | 0.53 | 1.79986E-12 | AC079336.3 | 0.42 | 5.21579E-08 |
| MTATP6P4     | 0.53 | 1.91791E-12 | FBXO36P1   | 0.42 | 5.26506E-08 |
| AL132775.1   | 0.52 | 2.0323E-12  | CEP192     | 0.42 | 5.26806E-08 |
| LINC02074    | 0.52 | 2.36559E-12 | MIR6775    | 0.42 | 5.28381E-08 |
| KRTAP7-1     | 0.52 | 2.36685E-12 | SNRPCP14   | 0.42 | 5.30425E-08 |
| LINC02636    | 0.52 | 2.47796E-12 | AL139010.1 | 0.42 | 5.52922E-08 |
| ATP6V1G1P7   | 0.52 | 3.35344E-12 | AL033523.1 | 0.42 | 5.54911E-08 |
| AL157702.1   | 0.52 | 3.42124E-12 | CLUHP3     | 0.42 | 5.61399E-08 |
| CT55         | 0.52 | 3.79907E-12 | F9         | 0.42 | 5.69591E-08 |
| AC136431.2   | 0.52 | 3.84498E-12 | AC121342.1 | 0.42 | 5.70032E-08 |
| SOCS2P2      | 0.52 | 4.26118E-12 | NLRP13     | 0.42 | 5.74883E-08 |
| AL355516.1   | 0.52 | 4.27243E-12 | MYO18B     | 0.42 | 5.84309E-08 |
| AP001033.3   | 0.52 | 4.28548E-12 | AC107926.1 | 0.42 | 5.9791E-08  |
| AC005291.2   | 0.52 | 4.91387E-12 | AL359736.1 | 0.42 | 6.07861E-08 |
| AL353726.2   | 0.52 | 5.37697E-12 | RN7SL79P   | 0.42 | 6.09998E-08 |
| LINC01297    | 0.52 | 5.42385E-12 | AC233702.1 | 0.42 | 6.25855E-08 |
| BOK-AS1      | 0.52 | 5.47723E-12 | COX20P2    | 0.42 | 6.26029E-08 |
| AC183088.4   | 0.51 | 6.35232E-12 | LINC01694  | 0.42 | 6.57356E-08 |
| ART5         | 0.51 | 6.8005E-12  | AC011626.1 | 0.42 | 6.9559E-08  |
| MIR3972      | 0.51 | 6.94443E-12 | AC023824.1 | 0.42 | 6.97164E-08 |
| MPPE1P1      | 0.51 | 8.42152E-12 | AC068790.2 | 0.42 | 7.06949E-08 |
| MIR7975      | 0.51 | 8.73433E-12 | RAB5CP1    | 0.42 | 7.10578E-08 |
| RFPL3        | 0.51 | 8.8823E-12  | AC073869.2 | 0.42 | 7.14685E-08 |
| PPP1R2P6     | 0.51 | 9.03131E-12 | ARL13A     | 0.41 | 7.32628E-08 |
| AGGF1P5      | 0.51 | 9.26537E-12 | AC106800.2 | 0.41 | 7.34786E-08 |
| AQP11        | 0.51 | 9.50631E-12 | CYP4F9P    | 0.41 | 7.34786E-08 |
| RNASEH1P1    | 0.51 | 9.96326E-12 | AC135050.6 | 0.41 | 7.55747E-08 |
| PRR5-ARHGAP8 | 0.51 | 1.00849E-11 | AC092058.1 | 0.41 | 7.60766E-08 |

|              |      |             |            |      |             |
|--------------|------|-------------|------------|------|-------------|
| AC006511.1   | 0.51 | 1.0586E-11  | BCR        | 0.41 | 7.69076E-08 |
| KRTAP4-1     | 0.51 | 1.19953E-11 | L34079.2   | 0.41 | 7.74213E-08 |
| SLC18A2      | 0.51 | 1.28025E-11 | LINC01511  | 0.41 | 7.85077E-08 |
| AL078602.1   | 0.51 | 1.28556E-11 | AP001547.1 | 0.41 | 7.92558E-08 |
| FUNDC2P3     | 0.51 | 1.32183E-11 | NOC2LP1    | 0.41 | 8.09629E-08 |
| LINC01861    | 0.51 | 1.33017E-11 | AL590762.1 | 0.41 | 8.15098E-08 |
| AL354674.1   | 0.51 | 1.38895E-11 | AC107385.2 | 0.41 | 8.21145E-08 |
| AC140479.4   | 0.51 | 1.38895E-11 | RPL30P2    | 0.41 | 8.23242E-08 |
| SMIM12P1     | 0.51 | 1.40251E-11 | CCK        | 0.41 | 8.27271E-08 |
| AC087222.1   | 0.51 | 1.42454E-11 | AP001033.2 | 0.41 | 8.30454E-08 |
| AC006504.4   | 0.51 | 1.49924E-11 | LINC02084  | 0.41 | 8.56065E-08 |
| ETNPPL       | 0.51 | 1.54307E-11 | MAPRE1P3   | 0.41 | 8.80429E-08 |
| RNU6-815P    | 0.51 | 1.61194E-11 | MRPS21P9   | 0.41 | 9.27768E-08 |
| AC009133.2   | 0.51 | 1.61194E-11 | AL121949.1 | 0.41 | 9.30247E-08 |
| RN7SL474P    | 0.51 | 1.61194E-11 | MIRLET7I   | 0.41 | 9.49898E-08 |
| AL390961.1   | 0.51 | 1.62284E-11 | GSDME      | 0.41 | 1.01066E-07 |
| LCN15        | 0.51 | 1.77538E-11 | FO393415.1 | 0.41 | 1.01676E-07 |
| LINC02432    | 0.50 | 1.84168E-11 | CMTM6      | 0.41 | 1.05976E-07 |
| AC007666.1   | 0.50 | 1.85408E-11 | AC004771.1 | 0.41 | 1.068E-07   |
| AC002351.1   | 0.50 | 1.85899E-11 | AP001531.1 | 0.41 | 1.10565E-07 |
| IGHV1OR21-1  | 0.50 | 2.11021E-11 | AC020612.4 | 0.41 | 1.12598E-07 |
| SRSF3P2      | 0.50 | 2.14786E-11 | CST5       | 0.41 | 1.1279E-07  |
| AC025277.1   | 0.50 | 2.77852E-11 | AMMECR1L   | 0.41 | 1.15529E-07 |
| AC244102.4   | 0.50 | 2.85431E-11 | ANKRD20A4P | 0.41 | 1.16896E-07 |
| AC023906.5   | 0.50 | 2.92909E-11 | AC002519.1 | 0.41 | 1.17941E-07 |
| RNU6-1178P   | 0.50 | 2.98423E-11 | LINC00895  | 0.41 | 1.19058E-07 |
| CTAG1B       | 0.50 | 3.18457E-11 | AL356747.1 | 0.41 | 1.1921E-07  |
| MC3R         | 0.50 | 3.23874E-11 | MIR1281    | 0.41 | 1.19582E-07 |
| AL138686.1   | 0.50 | 3.55768E-11 | INTS9-AS1  | 0.41 | 1.2531E-07  |
| LINC01488    | 0.50 | 3.66205E-11 | C10orf82   | 0.41 | 1.26789E-07 |
| FAM30B       | 0.50 | 3.75602E-11 | RNA5SP174  | 0.41 | 1.28792E-07 |
| AL049693.1   | 0.50 | 3.787E-11   | NRBF2P2    | 0.41 | 1.28923E-07 |
| RNY1P3       | 0.50 | 3.787E-11   | EAF1       | 0.41 | 1.29192E-07 |
| AC117454.1   | 0.50 | 3.787E-11   | AP001972.4 | 0.41 | 1.32458E-07 |
| IGHVII-30-21 | 0.50 | 3.81692E-11 | OR1J4      | 0.41 | 1.33082E-07 |
| AL022329.3   | 0.50 | 3.97682E-11 | AC006967.1 | 0.41 | 1.40892E-07 |
| LDHAL6A      | 0.50 | 4.035E-11   | AC087269.1 | 0.41 | 1.51959E-07 |
| DPRXP7       | 0.50 | 4.05483E-11 | AC027612.3 | 0.41 | 1.52519E-07 |
| ANKRD20A19P  | 0.50 | 4.4853E-11  | TRIM3      | 0.41 | 1.55326E-07 |
| AJ239322.1   | 0.50 | 4.58522E-11 | AL360091.1 | 0.41 | 1.56027E-07 |
| PPP1R26P4    | 0.50 | 4.67216E-11 | KLB        | 0.41 | 1.56665E-07 |
| KCNH3        | 0.50 | 4.83361E-11 | ARVCF      | 0.40 | 1.5783E-07  |

|            |      |             |            |      |             |
|------------|------|-------------|------------|------|-------------|
| ZNF812P    | 0.50 | 4.98303E-11 | AC000072.1 | 0.40 | 1.60312E-07 |
| KRTAP11-1  | 0.49 | 5.22735E-11 | AP000776.1 | 0.40 | 1.63332E-07 |
| AC036108.2 | 0.49 | 6.68283E-11 | AL451139.1 | 0.40 | 1.65037E-07 |
| SNORD115-5 | 0.49 | 7.08232E-11 | RARRES2P7  | 0.40 | 1.66609E-07 |
| AC027369.4 | 0.49 | 7.08232E-11 | AC127071.3 | 0.40 | 1.67201E-07 |
| OXTR       | 0.49 | 7.35471E-11 | AC104119.1 | 0.40 | 1.67933E-07 |
| PASD1      | 0.49 | 7.35874E-11 | PROZ       | 0.40 | 1.6994E-07  |
| AC091646.1 | 0.49 | 7.56972E-11 | RPS2P45    | 0.40 | 1.7008E-07  |
| RXFP1      | 0.49 | 7.98967E-11 | ANK2-AS1   | 0.40 | 1.70456E-07 |
| ADD3-AS1   | 0.49 | 7.99198E-11 | AC087269.2 | 0.40 | 1.70923E-07 |
| AC011379.2 | 0.49 | 8.34289E-11 | LINC00529  | 0.40 | 1.72305E-07 |
| FAM245A    | 0.49 | 8.43416E-11 | SPRING1    | 0.40 | 1.7424E-07  |
| SCYGR9     | 0.49 | 8.70201E-11 | BAIAP3     | 0.40 | 1.78983E-07 |
| UCP1       | 0.49 | 8.87735E-11 | MIR644A    | 0.40 | 1.81164E-07 |
| DRAXINP1   | 0.49 | 8.97159E-11 | CHRNA10    | 0.40 | 1.81841E-07 |
| FAM245B    | 0.49 | 9.51019E-11 | KRT12      | 0.40 | 1.82102E-07 |
| RPS6P26    | 0.49 | 9.62815E-11 | CLDN24     | 0.40 | 1.8242E-07  |
| AC009102.3 | 0.49 | 1.05642E-10 | IGBP1-AS1  | 0.40 | 1.8282E-07  |
| RNA5SP341  | 0.49 | 1.06358E-10 | MFF-DT     | 0.40 | 1.83108E-07 |
| OR7C2      | 0.49 | 1.06777E-10 | NSFP1      | 0.40 | 1.87353E-07 |
| RNU6-1087P | 0.49 | 1.06777E-10 | AC236972.1 | 0.40 | 1.90773E-07 |
| OR9L1P     | 0.49 | 1.06777E-10 | KRTAP9-1   | 0.40 | 1.90773E-07 |
| AL390123.1 | 0.49 | 1.06777E-10 | RNU6-600P  | 0.40 | 1.94169E-07 |
| NBPF21P    | 0.49 | 1.08676E-10 | AL133243.2 | 0.40 | 1.96559E-07 |
| AL450311.1 | 0.49 | 1.13392E-10 | BMP6P1     | 0.40 | 1.98542E-07 |
| RPL12P39   | 0.49 | 1.23993E-10 | AC004022.2 | 0.40 | 1.98985E-07 |
| AC113143.2 | 0.49 | 1.29936E-10 | RPL35AP31  | 0.40 | 1.9992E-07  |
| AL157414.2 | 0.49 | 1.30845E-10 | GTF3C6P3   | 0.40 | 2.02046E-07 |
| ARAFP1     | 0.49 | 1.30845E-10 | AL035691.1 | 0.40 | 2.04562E-07 |
| AC018712.2 | 0.49 | 1.30845E-10 | AL390961.3 | 0.40 | 2.06321E-07 |
| RPSAP68    | 0.49 | 1.30845E-10 | MIR4443    | 0.40 | 2.06477E-07 |
| AC134980.1 | 0.49 | 1.38333E-10 | AL136418.1 | 0.40 | 2.06703E-07 |
| AC087863.1 | 0.48 | 1.60126E-10 | RNU6-705P  | 0.40 | 2.1379E-07  |
| CEND1P1    | 0.48 | 1.60126E-10 | AC015982.1 | 0.40 | 2.18563E-07 |
| NUTF2P8    | 0.48 | 1.60126E-10 | PFN1P10    | 0.40 | 2.25003E-07 |
| AC025678.2 | 0.48 | 1.72302E-10 | AC004232.2 | 0.40 | 2.30066E-07 |
| OR1L1      | 0.48 | 1.78356E-10 | RPL6P30    | 0.40 | 2.32029E-07 |
| RNA5SP290  | 0.48 | 1.91214E-10 | VN1R91P    | 0.40 | 2.34208E-07 |
| UBE2V1P11  | 0.48 | 1.957E-10   | AC008080.1 | 0.40 | 2.34431E-07 |
| AC117522.1 | 0.48 | 1.957E-10   | KMT5B      | 0.40 | 2.35101E-07 |
| KATNBL1P4  | 0.48 | 1.957E-10   | ARHGEF33   | 0.40 | 2.35893E-07 |
| AC100810.2 | 0.48 | 1.957E-10   | AC131235.1 | 0.40 | 2.36847E-07 |

---

|               |      |             |            |      |             |
|---------------|------|-------------|------------|------|-------------|
| MTND6P19      | 0.48 | 1.957E-10   | PRAP1      | 0.40 | 2.37059E-07 |
| PRR20G        | 0.48 | 2.14599E-10 | AC097015.1 | 0.40 | 2.40522E-07 |
| AC087392.3    | 0.48 | 2.35739E-10 | AC008443.6 | 0.40 | 2.47207E-07 |
| AC112243.1    | 0.48 | 2.60192E-10 | AC023908.1 | 0.40 | 2.54218E-07 |
| ZPLD2P        | 0.48 | 2.637E-10   | AL139008.2 | 0.40 | 2.56285E-07 |
| AC116099.1    | 0.48 | 2.64597E-10 | RPSAP37    | 0.40 | 2.65074E-07 |
| AC008443.2    | 0.48 | 2.64937E-10 | OR8S21P    | 0.40 | 2.65074E-07 |
| FAM9B         | 0.48 | 2.67154E-10 | AL445675.1 | 0.40 | 2.6548E-07  |
| AC021683.6    | 0.48 | 2.69873E-10 | AC008083.1 | 0.40 | 2.66939E-07 |
| AL391358.1    | 0.48 | 2.99658E-10 | AL132765.1 | 0.40 | 2.68743E-07 |
| AC007342.4    | 0.48 | 2.99886E-10 | FAM95B1    | 0.40 | 2.73853E-07 |
| ELOCP21       | 0.48 | 3.45616E-10 | AP002812.5 | 0.40 | 2.74579E-07 |
| AC004875.1    | 0.48 | 3.48049E-10 | AL133493.2 | 0.40 | 2.75417E-07 |
| AC010601.1    | 0.48 | 3.49833E-10 | AC104071.1 | 0.40 | 2.83963E-07 |
| OR52M1        | 0.48 | 3.50053E-10 | AC008738.6 | 0.40 | 2.84721E-07 |
| AC134978.1    | 0.47 | 3.85112E-10 | RPL23AP15  | 0.40 | 2.89886E-07 |
| AP001804.1    | 0.47 | 3.90742E-10 | MTCO1P54   | 0.40 | 2.90778E-07 |
| LINC02181     | 0.47 | 4.01627E-10 | MTDHP2     | 0.40 | 2.92571E-07 |
| ABCA9-AS1     | 0.47 | 4.2265E-10  | AC019257.2 | 0.40 | 3.02178E-07 |
| AP003559.1    | 0.47 | 4.42463E-10 | EXOC5P1    | 0.40 | 3.04097E-07 |
| GOLGA8M       | 0.47 | 4.55371E-10 | PGAM1P11   | 0.40 | 3.12389E-07 |
| RN7SKP169     | 0.47 | 4.69699E-10 | ARHGAP28   | 0.40 | 3.13931E-07 |
| BX072579.2    | 0.47 | 4.84168E-10 | FAM30C     | 0.40 | 3.25863E-07 |
| OR7E145P      | 0.47 | 5.10522E-10 | DPYS       | 0.40 | 3.27978E-07 |
| AL109897.1    | 0.47 | 5.1855E-10  | AL365203.1 | 0.40 | 3.28291E-07 |
| AC018697.1    | 0.47 | 5.35282E-10 | LINC01287  | 0.40 | 3.2947E-07  |
| TAS1R2        | 0.47 | 5.50799E-10 | PLCD1      | 0.40 | 3.32018E-07 |
| LINC01524     | 0.47 | 5.82417E-10 |            |      |             |
| CCDC144NL-AS1 | 0.47 | 6.08038E-10 |            |      |             |
| OR56A3        | 0.47 | 6.09016E-10 |            |      |             |
| SLC7A10       | 0.47 | 6.28858E-10 |            |      |             |

---



**Table S7.** GO annotation of genes positively associated with LINC01087 expression in BC, ESCA, OV, STAD and TGCT.

| GO domain | GO term description                                         | GO term ID | N. of genes | P-value adj | Gene symbol                                                                                                                                                                                                                                                                                                                      |
|-----------|-------------------------------------------------------------|------------|-------------|-------------|----------------------------------------------------------------------------------------------------------------------------------------------------------------------------------------------------------------------------------------------------------------------------------------------------------------------------------|
| BP        | synaptic transmission. GABAergic                            | GO:0051932 | 9           | 0.008       | GABRG1 (ESCA), NLGN1 (ESCA), GABRG2 (ESCA), OXTR (ESCA, STAD), GABRA2 (ESCA), BAIAP3 (ESCA, STAD), SYN3 (STAD), RAC3 (TGCT), GABRA6 (TGCT)                                                                                                                                                                                       |
| CC        | synaptic membrane                                           | GO:0097060 | 22          | 0.009       | SLITRK1 (ESCA), GABRG1 (ESCA), GRIN3A (ESCA), GABBR2 (ESCA), NLGN1 (ESCA), GRIA2 (ESCA), GRIA4 (ESCA), DNM3 (ESCA), GLRB (ESCA), ERBB4 (ESCA), CDH10 (ESCA), GABRG2 (ESCA, STAD), KCNC3 (ESCA), GABRA2 (ESCA), GRIN1 (ESCA), GSG1L (ESCA), CHRNE (ESCA), CDH8 (STAD), SNCAIP (STAD), CNTN5 (STAD), GABRA6 (TGCT), CHRNA10 (TGCT) |
| CC        | postsynaptic membrane                                       | GO:0045211 | 19          | 0.009       | SLITRK1 (ESCA), GABRG1 (ESCA), GRIN3A (ESCA), GABBR2 (ESCA), NLGN1 (ESCA), GRIA2 (ESCA), GRIA4 (ESCA), DNM3 (ESCA), GLRB (ESCA), ERBB4 (ESCA), CDH10 (ESCA), GABRG2 (ESCA, STAD), KCNC3 (ESCA), GABRA2 (ESCA), GRIN1 (ESCA), GSG1L (ESCA), CHRNE (ESCA), GABRA6 (TGCT), CHRNA10 (TGCT)                                           |
| CC        | DNA packaging complex                                       | GO:0044815 | 13          | 0.032       | H2BU1 (ESCA), H4C5 (ESCA), H2AC7 (ESCA), STAG3 (ESCA), H2BC15 (ESCA), H2AW (ESCA), RAD21L1 (ESCA), H2AB3 (ESCA), SS18L1 (ESCA), H2BC9 (ESCA), BCL11A (STAD), H2BW1 (STAD), H2BC19P (STAD)                                                                                                                                        |
| CC        | postsynaptic specialization membrane                        | GO:0099634 | 10          | 0.020       | SLITRK1 (ESCA), GRIN3A (ESCA), NLGN1 (ESCA), GRIA2 (ESCA), ERBB4 (ESCA), CDH10 (ESCA), GABRG2 (ESCA, STAD), GABRA2 (ESCA), GSG1L (ESCA), CHRNA10 (TGCT)                                                                                                                                                                          |
| CC        | integral component of postsynaptic specialization membrane  | GO:0099060 | 9           | 0.009       | SLITRK1 (ESCA), GRIN3A (ESCA), NLGN1 (ESCA), ERBB4 (ESCA), CDH10 (ESCA), GABRG2 (ESCA, STAD), GABRA2 (ESCA), GSG1L (ESCA), CHRNA10 (TGCT)                                                                                                                                                                                        |
| CC        | intrinsic component of postsynaptic specialization membrane | GO:0098948 | 9           | 0.009       | SLITRK1 (ESCA), GRIN3A (ESCA), NLGN1 (ESCA), ERBB4 (ESCA), CDH10 (ESCA), GABRG2 (ESCA, STAD), GABRA2 (ESCA), GSG1L (ESCA), CHRNA10 (TGCT)                                                                                                                                                                                        |
| CC        | GABA-ergic synapse                                          | GO:0098982 | 8           | 0.017       | SLITRK1 (ESCA), GLRB (ESCA), ERBB4 (ESCA), CDH10 (ESCA), GABRG2 (ESCA, STAD), GABRA2 (ESCA), EFNA5 (ESCA), CNTN5 (STAD)                                                                                                                                                                                                          |
| CC        | synaptonemal complex                                        | GO:0000795 | 6           | 0.019       | SYCE1 (ESCA), STAG3 (ESCA), RAD21L1 (ESCA), SYCP2L (STAD), FAM9B (TGCT), FAM9A (TGCT)                                                                                                                                                                                                                                            |
| CC        | synaptonemal structure                                      | GO:0099086 | 6           | 0.019       | SYCE1 (ESCA), STAG3 (ESCA), RAD21L1 (ESCA), SYCP2L (STAD), FAM9B (TGCT), FAM9A (TGCT)                                                                                                                                                                                                                                            |
| CC        | chloride channel complex                                    | GO:0034707 | 6           | 0.043       | GABRG1 (ESCA), GLRB (ESCA), GABRG2 (ESCA, STAD), GABRA2 (ESCA), CLCN1 (OV), GABRA6 (ESCA)                                                                                                                                                                                                                                        |

|    |                                                 |            |    |          |                                                                                                                                                                                                                                                                                                                                        |
|----|-------------------------------------------------|------------|----|----------|----------------------------------------------------------------------------------------------------------------------------------------------------------------------------------------------------------------------------------------------------------------------------------------------------------------------------------------|
| CC | GABA receptor complex                           | GO:1902710 | 5  | 0.009    | GABRG1 (ESCA), GABBR2 (ESCA), GABRG2 (ESCA, STAD), GABRA2 (ESCA), GABRA6 (TGCT)                                                                                                                                                                                                                                                        |
| CC | synaptic cleft                                  | GO:0043083 | 4  | 0.030    | NLGN1 (ESCA), DNMT3 (ESCA), GRIN1 (ESCA), CDH8 (STAD)                                                                                                                                                                                                                                                                                  |
| CC | GABA-A receptor complex                         | GO:1902711 | 4  | 0.032    | GABRG1 (ESCA), GABRG2 (ESCA, STAD), GABRA2 (ESCA), GABRA6 (TGCT)                                                                                                                                                                                                                                                                       |
| MF | channel activity                                | GO:0015267 | 23 | 0.027    | GABRG1 (ESCA), GRIN3A (ESCA), GRIA2 (ESCA), GRIA4 (ESCA), GLRB (ESCA), PANX3 (ESCA), KCNV1 (ESCA), KCNQ2 (ESCA), GABRG2 (ESCA, STAD), P2RX2 (ESCA), KCNH5 (ESCA), KCNN1 (ESCA), KCNC3 (ESCA), GABRA2 (ESCA), GRIN1 (ESCA), GJD2 (ESCA), CHRNE (ESCA), CLCN1 (OV), GJA8 (OV), AQP11 (TGCT), KCNH3 (TGCT), GABRA6 (TGCT), CHRNA10 (TGCT) |
| MF | passive transmembrane transporter activity      | GO:0022803 | 23 | 0.027    | GABRG1 (ESCA), GRIN3A (ESCA), GRIA2 (ESCA), GRIA4 (ESCA), GLRB (ESCA), PANX3 (ESCA), KCNV1 (ESCA), KCNQ2 (ESCA), GABRG2 (ESCA, STAD), P2RX2 (ESCA), KCNH5 (ESCA), KCNN1 (ESCA), KCNC3 (ESCA), GABRA2 (ESCA), GRIN1 (ESCA), GJD2 (ESCA), CHRNE (ESCA), CLCN1 (OV), GJA8 (OV), AQP11 (TGCT), KCNH3 (TGCT), GABRA6 (TGCT), CHRNA10 (TGCT) |
| MF | gated channel activity                          | GO:0022836 | 19 | 0.012    | GABRG1 (ESCA), GRIN3A (ESCA), GRIA2 (ESCA), GRIA4 (ESCA), GLRB (ESCA), KCNV1 (ESCA), KCNQ2 (ESCA), GABRG2 (ESCA, STAD), P2RX2 (ESCA), KCNH5 (ESCA), KCNN1 (ESCA), KCNC3 (ESCA), GABRA2 (ESCA), GRIN1 (ESCA), CHRNE (ESCA), CLCN1 (OV), KCNH3 (TGCT), GABRA6 (TGCT), CHRNA10 (TGCT)                                                     |
| MF | ligand-gated ion channel activity               | GO:0015276 | 13 | 0.002    | GABRG1 (ESCA), GRIN3A (ESCA), GRIA2 (ESCA), GRIA4 (ESCA), GLRB (ESCA), GABRG2 (ESCA, STAD), P2RX2 (ESCA), KCNN1 (ESCA), GABRA2 (ESCA), GRIN1 (ESCA), CHRNE (ESCA), GABRA6 (TGCT), CHRNA10 (TGCT)                                                                                                                                       |
| MF | ligand-gated channel activity                   | GO:0022834 | 13 | 0.002    | GABRG1, GRIN3A, GRIA2, GRIA4, GLRB, GABRG2, P2RX2, KCNN1, GABRA2, GRIN1, CHRNE, GABRA6, CHRNA10                                                                                                                                                                                                                                        |
| MF | extracellular ligand-gated ion channel activity | GO:0005230 | 12 | 1.82E-05 | GABRG1 (ESCA), GRIN3A (ESCA), GRIA2 (ESCA), GRIA4 (ESCA), GLRB (ESCA), GABRG2 (ESCA, STAD), P2RX2 (ESCA), GABRA2 (ESCA), GRIN1 (ESCA), CHRNE (ESCA), GABRA6 (TGCT), CHRNA10 (TGCT)                                                                                                                                                     |
| MF | transmitter-gated ion channel activity          | GO:0022824 | 11 | 1.82E-05 | GABRG1 (ESCA), GRIN3A(ESCA), GRIA2(ESCA), GRIA4(ESCA), GLRB (ESCA), GABRG2 (ESCA, STAD), GABRA2(ESCA), GRIN1 (ESCA), CHRNE (ESCA), GABRA6 (TGCT), CHRNA10 (TGCT)                                                                                                                                                                       |
| MF | transmitter-gated channel activity              | GO:0022835 | 11 | 1.82E-05 | GABRG1 (ESCA), GRIN3A (ESCA), GRIA2 (ESCA), GRIA4 (ESCA), GLRB (ESCA), GABRG2 (ESCA, STAD), GABRA2 (ESCA), GRIN1 (ESCA), CHRNE (ESCA), GABRA6 (TGCT), CHRNA10 (TGCT)                                                                                                                                                                   |

|    |                                                                                                  |            |    |         |                                                                                                                                                                      |
|----|--------------------------------------------------------------------------------------------------|------------|----|---------|----------------------------------------------------------------------------------------------------------------------------------------------------------------------|
| MF | neurotransmitter receptor activity                                                               | GO:0030594 | 11 | 0.003   | GABRG1 (ESCA), GRIN3A (ESCA), GRIA2 (ESCA), GRIA4 (ESCA), GLRB (ESCA), GABRG2 (ESCA, STAD), GABRA2 (ESCA), GRIN1 (ESCA), CHRNE (ESCA), GABRA6 (TGCT), CHRNA10 (TGCT) |
| MF | peptide receptor activity                                                                        | GO:0001653 | 11 | 0.026   | NTSR2 (ESCA), PROKR2 (ESCA), OXTR (ESCA, TGCT), PTH2R (ESCA), UTS2R (ESCA), GPR37 (ESCA), GPR83 (OV), VIPR2 (OV), GUCY2D (STAD), MC3R (TGCT), RXFP1 (TGCT)           |
| MF | odorant binding                                                                                  | GO:0005549 | 9  | 0.04348 | OR13G1 (BRCA), OR8D1 (ESCA), OR8A1 (ESCA), OR8B12 (ESCA), OR8D2 (ESCA), OR8B2 (ESCA), OR8G1 (ESCA), OR8B3 (ESCA), OR8G3P (ESCA)                                      |
| MF | transmitter-gated ion channel activity involved in regulation of postsynaptic membrane potential | GO:1904315 | 8  | 0.001   | GABRG1 (ESCA), GRIN3A (ESCA), GLRB (ESCA), GABRG2 (ESCA), GABRA2 (ESCA, STAD), CHRNE (ESCA), GABRA6 (TGCT), CHRNA10 (TGCT)                                           |
| MF | neurotransmitter receptor activity involved in regulation of postsynaptic membrane potential     | GO:0099529 | 8  | 0.001   | GABRG1 (ESCA), GRIN3A (ESCA), GLRB (ESCA), GABRG2 (ESCA, STAD), GABRA2 (ESCA), CHRNE (ESCA), GABRA6 (TGCT), CHRNA10 (TGCT)                                           |
| MF | postsynaptic neurotransmitter receptor activity                                                  | GO:0098960 | 8  | 0.005   | GABRG1 (ESCA), GRIN3A (ESCA), GLRB (ESCA), GABRG2 (ESCA, STAD), GABRA2 (ESCA), CHRNE (ESCA), GABRA6 (TGCT), CHRNA10 (TGCT)                                           |
| MF | inhibitory extracellular ligand-gated ion channel activity                                       | GO:0005237 | 5  | 0.001   | GABRG1 (ESCA), GLRB (ESCA), GABRG2 (ESCA, STAD), GABRA2 (ESCA), GABRA6 (TGCT)                                                                                        |
| MF | ligand-gated anion channel activity                                                              | GO:0099095 | 5  | 0.002   | GABRG1 (ESCA), GLRB (ESCA), GABRG2 (ESCA, STAD), GABRA2 (ESCA), GABRA6 (TGCT)                                                                                        |
| MF | GABA receptor activity                                                                           | GO:0016917 | 5  | 0.005   | GABRG1, GABBR2, GABRG2, GABRA2, GABRA6                                                                                                                               |
| MF | benzodiazepine receptor activity                                                                 | GO:0008503 | 4  | 0.004   | GABRG1 (ESCA), GABRG2 (ESCA, STAD), GABRA2 (ESCA), GABRA6 (TGCT)                                                                                                     |
| MF | GABA-gated chloride ion channel activity                                                         | GO:0022851 | 4  | 0.006   | GABRG1 (ESCA), GABRG2 (ESCA, STAD), GABRA2 (ESCA), GABRA6 (TGCT)                                                                                                     |
| MF | GABA-A receptor activity                                                                         | GO:0004890 | 4  | 0.026   | GABRG1 (ESCA), GABRG2 (ESCA, STAD), GABRA2 (ESCA), GABRA6 (TGCT)                                                                                                     |
| MF | ionotropic glutamate receptor activity                                                           | GO:0004970 | 4  | 0.026   | GRIN3A (ESCA), GRIA2 (ESCA), GRIA4 (ESCA), GRIN1 (ESCA)                                                                                                              |

Tumors associated with enriched genes in each GO term are reported in brackets. Abbreviations: adj. adjusted p-value; BC, breast cancer; BP; biological process; CC, cellular component; ESCA, esophageal carcinoma; GABA: gamma-aminobutyric acid; GO, gene ontology; MF, molecular function; OV, ovarian cancer; STAD, stomach adenocarcinoma; TGCT, testicular germ cell cancers.

**Table S8.** KEGG pathways associated with LINC01087 expression in BC, ESCA, OV, STAD and TGCT.

| Pathway ID | Pathway description                     | N. of genes | P-value adj | Gene symbol                                                                                                                                                                                                                                                                                                                                                                                             |
|------------|-----------------------------------------|-------------|-------------|---------------------------------------------------------------------------------------------------------------------------------------------------------------------------------------------------------------------------------------------------------------------------------------------------------------------------------------------------------------------------------------------------------|
| hsa04080   | Neuroactive ligand-receptor interaction | 28          | 3.48159E-07 | GNRHR (BC), TAC3 (ESCA), GABRG1 (ESCA), GRIN3A (ESCA), GABBR2 (ESCA), PTH2 (ESCA), GRIA2 (ESCA), GRIA4 (ESCA), GLRB (ESCA), NTSR2 (ESCA), GABRG2 (ESCA, STAD), P2RX2 (ESCA), OXTR (ESCA, STAD), GABRA2 (ESCA), GRIN1 (ESCA), PTH2R (ESCA), UTS2R (ESCA), CHRNE (ESCA), CALCA (OV), PATE2 (OV), GPR83 (OV), VIPR2 (OV), AVP (STAD), MC3R (TGCT), RXFP1 (TGCT), GABRA6 (TGCT), CCK (TGCT), CHRNA10 (TGCT) |
| hsa05034   | Alcoholism                              | 12          | 0.02821     | GNG13 (ESCA), GRIN3A (ESCA), H2BU1 (ESCA), H4C5 (ESCA), H2AC7 (ESCA), GRIN1 (ESCA), H2BC15 (ESCA), H2AW (ESCA), H2AB3 (ESCA), H2BC9 (ESCA), H2BW1 (STAD), SLC18A2(TGCT)                                                                                                                                                                                                                                 |
| hsa04742   | Taste transduction                      | 9           | 0.00501     | TAS2R20 (BC), TAS2R4 (BC), GNG13(ESCA), GABBR2(ESCA), P2RX2(ESCA), GABRA2(ESCA), TAS2R14(ESCA), TAS1R2 (TGCT), GABRA6 (TGCT)                                                                                                                                                                                                                                                                            |
| hsa05033   | Nicotine addiction                      | 8           | 0.00014     | GABRG1 (ESCA), GRIN3A (ESCA), GRIA2 (ESCA), GRIA4 (ESCA), GABRG2 (ESCA, STAD), GABRA2 (ESCA), GRIN1 (ESCA), GABRA6 (TGCT)                                                                                                                                                                                                                                                                               |

Tumors associated with enriched genes in each KEGG pathway are reported in brackets. Abbreviations: adj. adjusted p-value; BC, breast cancer; ESCA, esophageal carcinoma; KEGG, Kyoto encyclopedia of genes and genomes; OV, ovarian cancer; STAD, stomach adenocarcinoma; TGCT, testicular germ cell cancers.

**Table S9.** Prediction of subcellular localization of LINC0187 using "lncLocator" database.

| Subcellular locations | score |
|-----------------------|-------|
| Cytoplasm             | 0.76  |
| Cytosol               | 0.16  |
| Ribosome              | 0.04  |
| Nucleus               | 0.03  |

**Table S10.** List of the 64 miRNAs significantly correlated with LINC01087 expression in BC, ESCA, OV, STAD and TGCT in TCGA datasets (Analysis 2).

[illegible]

---

|          |      |             |
|----------|------|-------------|
| MIR376A2 | 0.43 | 3.2875E-51  |
| MIR626   | 0.42 | 7.24075E-50 |
| MIR1284  | 0.41 | 7.15407E-47 |
| MIR4796  | 0.41 | 3.20014E-45 |
| MIR491   | 0.40 | 1.46935E-44 |
| MIR651   | 0.40 | 4.61001E-44 |

---

miRNAs showing the top 5 strongest correlation value (R) across the tumor types are highlighted in bold. Abbreviations: BC, breast cancer; ESCA, esophageal carcinoma; OV, ovarian cancer; STAD, stomach adenocarcinoma; TGCT, testicular germ cell cancers.

**Table S11.** List of the 31 mRNA targets of LINC01087-related miRNAs that overlapped between Analysis 1 and Analysis 2.

---

|                |
|----------------|
| ACVR2B         |
| ARIH2OS        |
| <b>C8orf37</b> |
| <b>EFNA5</b>   |
| FAM169B        |
| FAM216A        |
| FTCD           |
| GABBR2         |
| GSG1L          |
| HES7           |
| <b>HOOK3</b>   |
| HOXD10         |
| <b>IQCG</b>    |
| KBTBD13        |
| LVRN           |
| <b>MYOZ3</b>   |
| <b>PCP4L1</b>  |
| PDE6B          |
| PKHD1          |
| <b>PLAG1</b>   |
| <b>POLI</b>    |
| RBM48          |
| RGL2           |
| RTBDN          |
| SELENOS        |
| <b>SLC2A3</b>  |
| <b>SNRPA1</b>  |
| UFL1           |
| VPS50          |
| ZC3H11A        |
| ZNF410         |

---

Target genes shared between the Analyses 2 and 3 are highlighted in bold.



**Table S12.** List of the 20 miRNA identified to interact with LINC01087 in the DIANA-LncBASE repository (Analysis 3).

---

|                 |
|-----------------|
| hsa-let-7a-5p   |
| hsa-let-7d-5p   |
| hsa-let-7e-5p   |
| hsa-miR-148b-5p |
| hsa-miR-152-3p  |
| hsa-miR-181a-5p |
| hsa-miR-181b-5p |
| hsa-miR-181d-5p |
| hsa-miR-197-3p  |
| hsa-miR-19a-3p  |
| hsa-miR-19b-3p  |
| hsa-miR-21-5p   |
| hsa-miR-25-3p   |
| hsa-miR-32-5p   |
| hsa-miR-34a-5p  |
| hsa-miR-423-5p  |
| hsa-miR-7-5p    |
| hsa-miR-92a-3p  |
| hsa-miR-92b-3p  |
| hsa-miR-98-5p   |

---

**Table S13.** List of the 68 mRNA targets of LINC01087-related miRNAs that overlapped between Analysis 1 and Analysis 3.

---

ADAMTS17  
ADGRL2  
AMMECR1L  
ANKIB1  
ANKRD36  
ARID3A  
ARRDC4  
BCL11A  
BCR  
BMF  
BMP3  
BTBD10  
C10orf88  
C17orf100  
C2orf68  
**C8orf37**  
CDH18  
CMTM6  
CST5  
CTCFL  
CYP51A1  
DENND2C  
DSCR8  
EDIL3  
**EFNA5**  
ERBB4  
FIGN  
GATA3  
GPR37  
GPR55  
GPR83  
GRIA2  
HABP4  
HAPLN1  
**HOOK3**  
HOXC12  
IGF2BP1  
**IQCG**  
KLB

---

KRIT1  
KRTAP11-1  
LRRC28  
LRRN3  
MAGEA6  
MATR3  
MST1  
**MYOZ3**  
NAT8L  
NUTM1  
OXTR  
PATE2  
PCDH10  
**PCP4L1**  
PDGFC  
**PLAG1**  
**POLI**  
POTEG  
PRR3  
PRR5-ARHGAP8  
SALL3  
SALL4  
SLC11A2  
SLC2A11  
**SLC2A3**  
**SNRPA1**  
ZFR2  
ZNF280B  
ZNF780A

---

Target genes shared between the Analyses 2 and 3 are highlighted in bold.

## Supplementary Figures

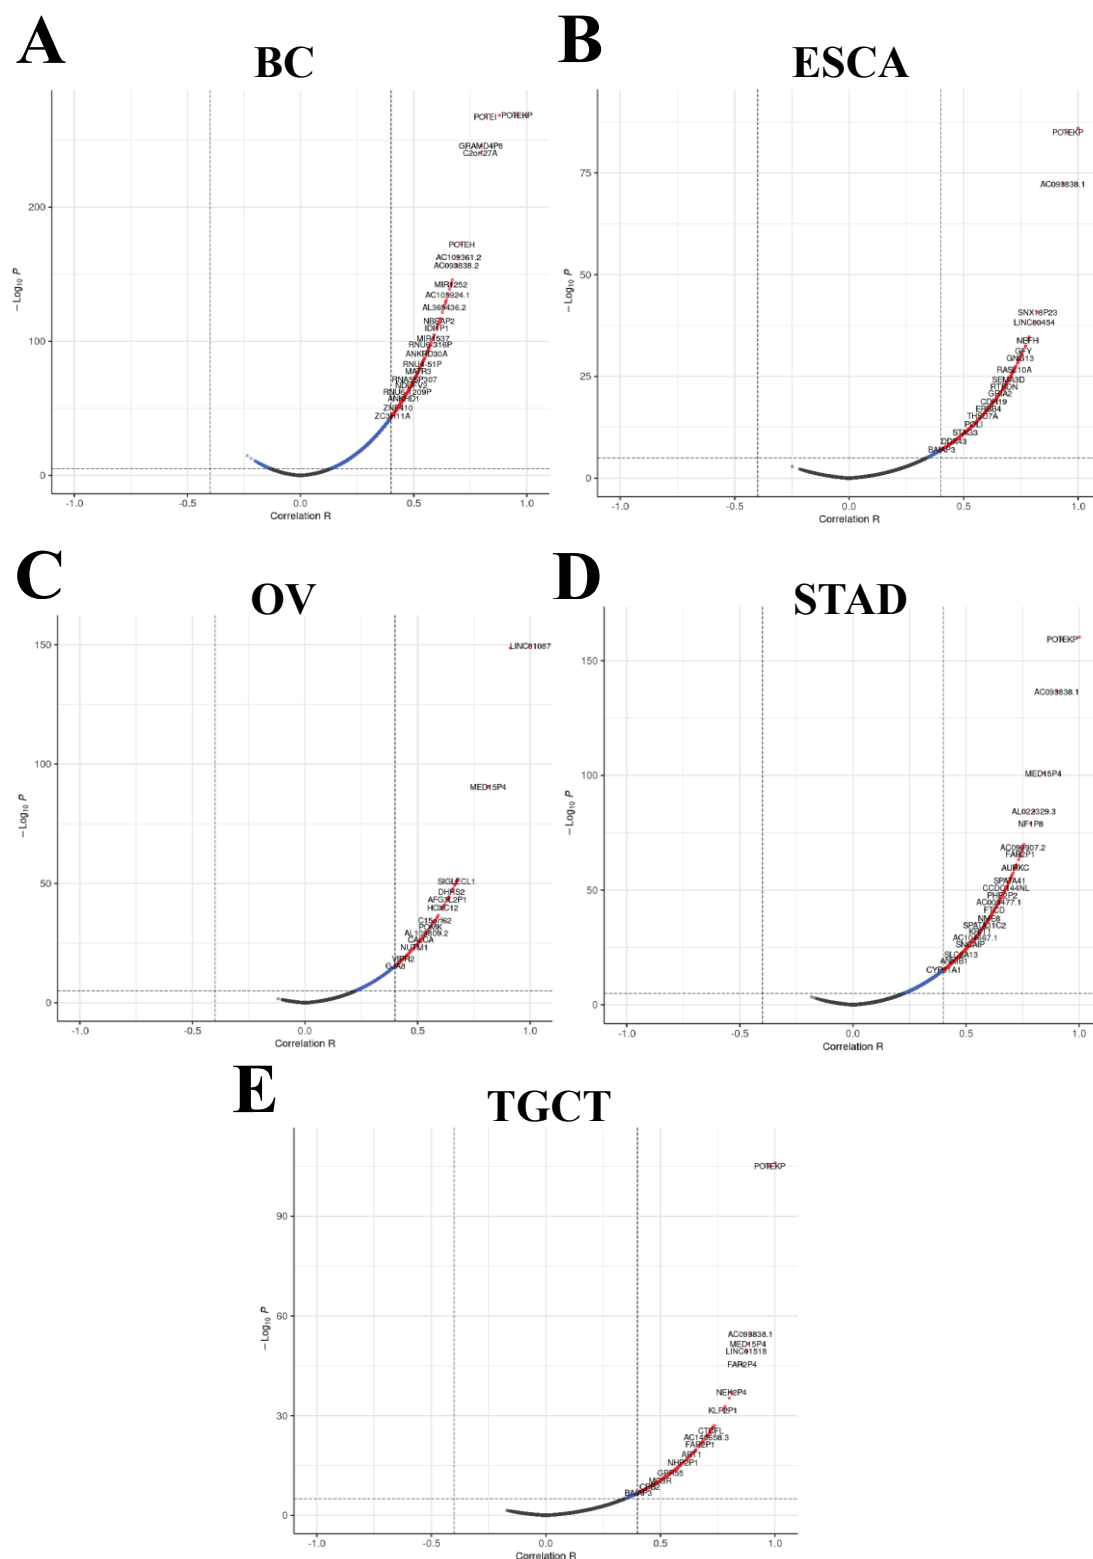

**Figure S1. Differentially expressed genes correlated with LINC01087 expression in several tissue types extracted from TCGA.** Volcano plots showing both significant (Spearman correlation test,  $R > 0.4$ ,  $p < 0.05$ , in red) and non-significant (Spearman correlation test,  $R < 0.4$ ,  $p > 0.05$ , in dark and light grey) correlations between LINC01087 expression and transcripts in BC (A), ESCA (B), OV (C), STAD (D), and TGCT (E). Genes showing cut-off criteria of  $|R| < 0.4$  and  $p < 0.05$  value are highlighted in blue. The expression values are reported as log2FC. Corresponding data of the statistical analyses are displayed in **Supplementary Table S2-S6**. Abbreviations: BC, breast cancer; ESCA, esophageal carcinoma; OV, ovarian cancer; STAD, stomach adenocarcinoma; TCGA, the cancer genome atlas; TGCT, testicular germ cell tumours.
